# Supplementary material
Source: PubMed Central journal article supplement (PMC4215164)
Supplement: NIHMS619770-supplement-1.pdf [file NIHMS619770-supplement-1.pdf]

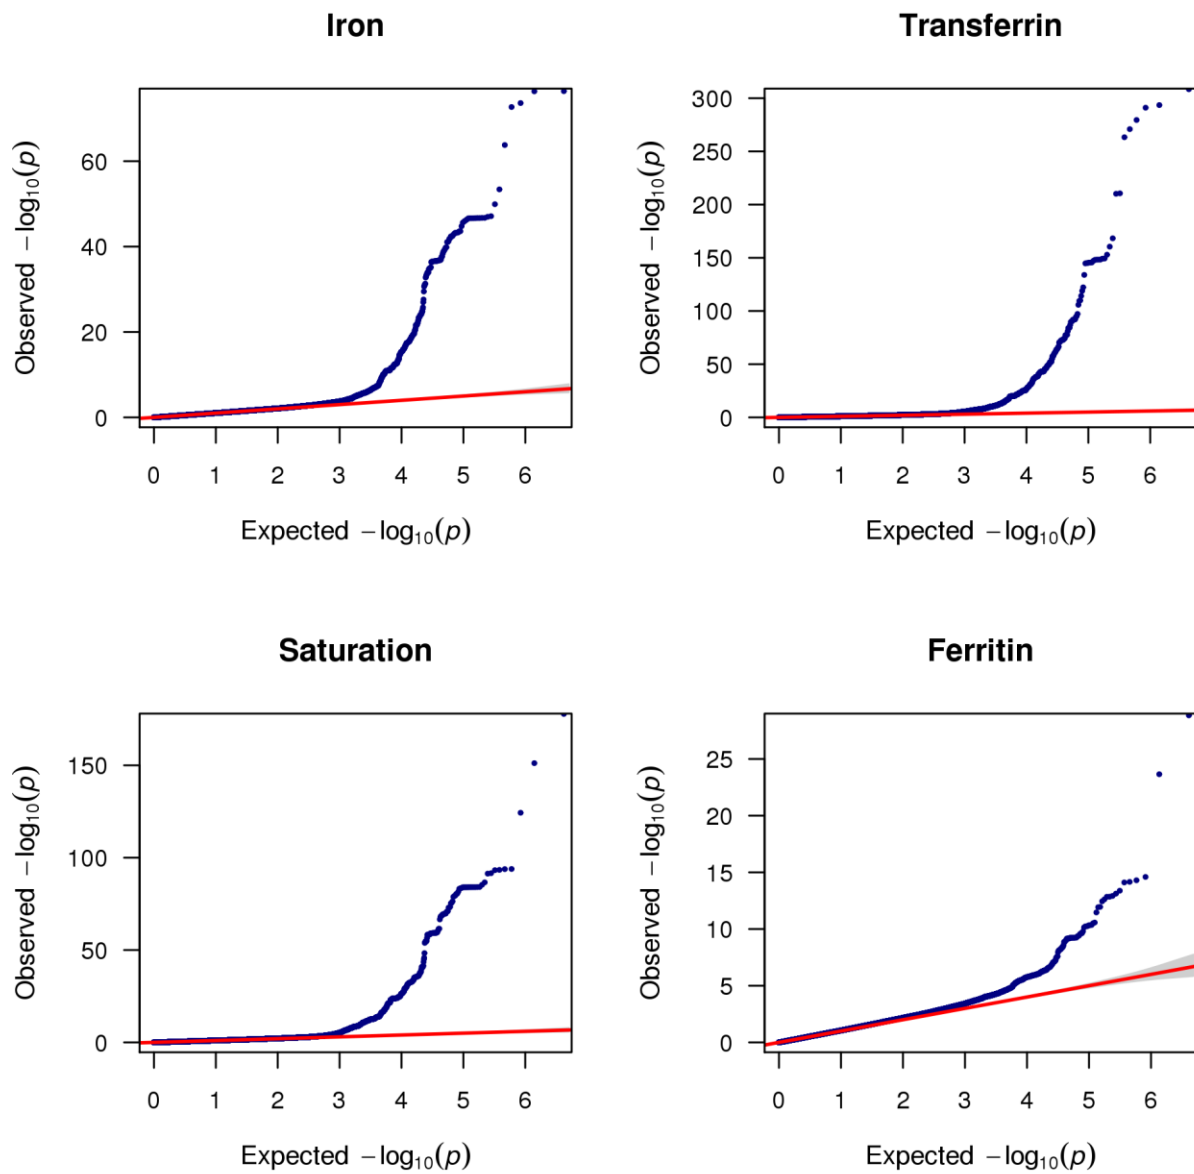

**Supplementary Figure 1.** Q-Q plots for iron, transferrin, saturation and ferritin in the Discovery meta-analysis. The genomic inflation factors ( $\lambda$ ) are 1.035, 1.092, 1.051 and 1.067 for serum iron, transferrin, transferrin saturation and ferritin, respectively.

## Supplementary Figure 2.

### DISCOVERY.

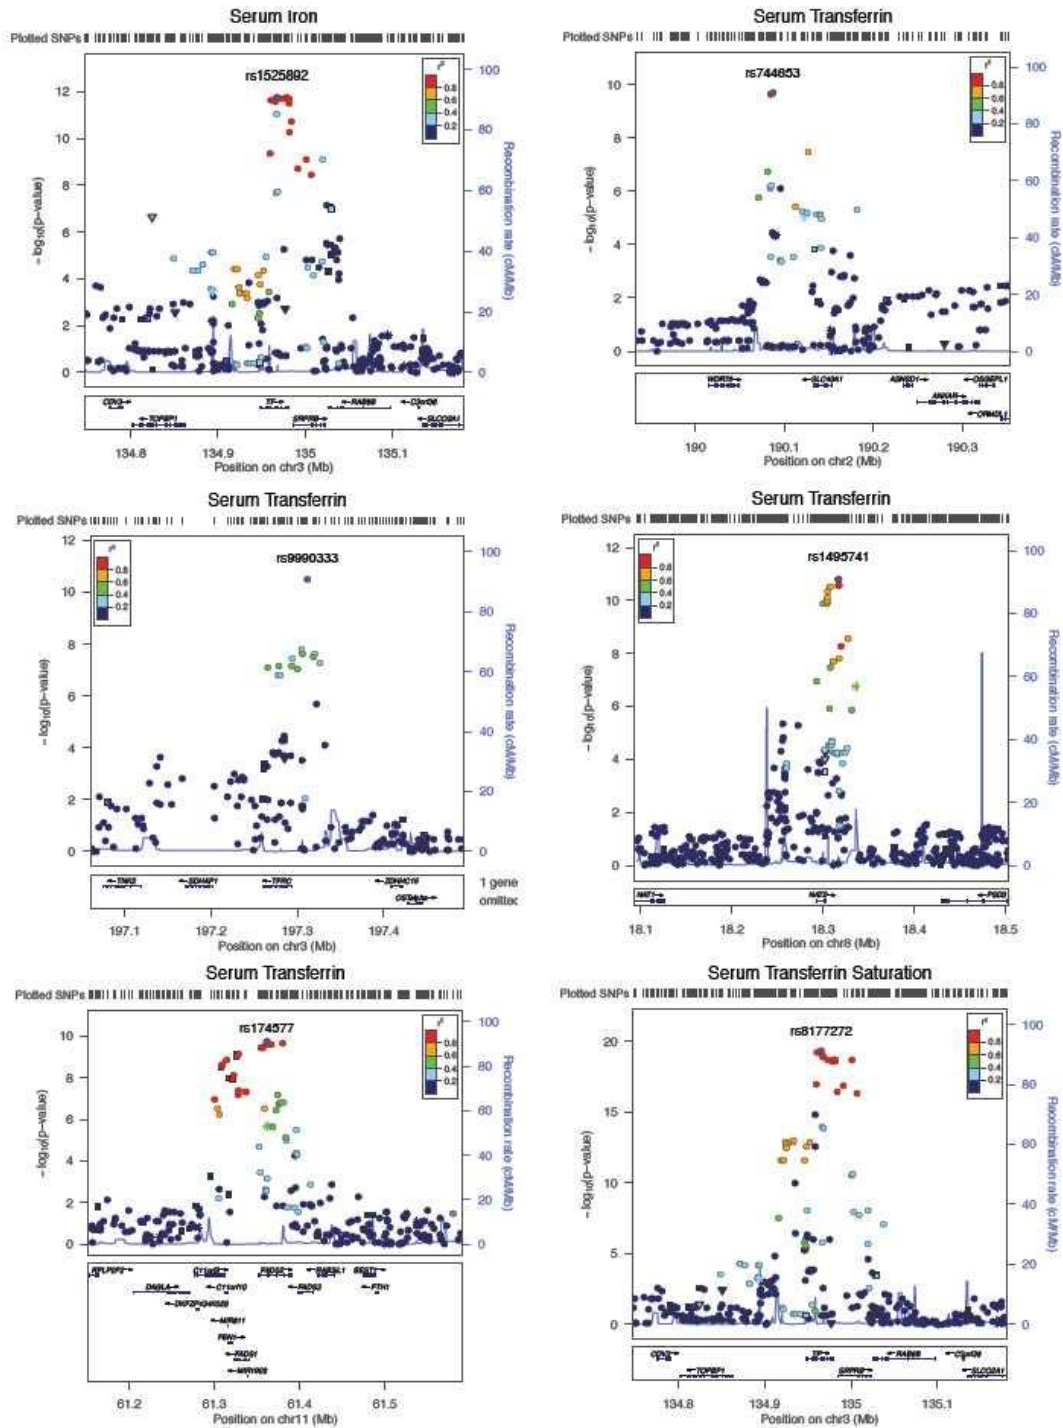

**Supplementary Figure 2 (continued).**

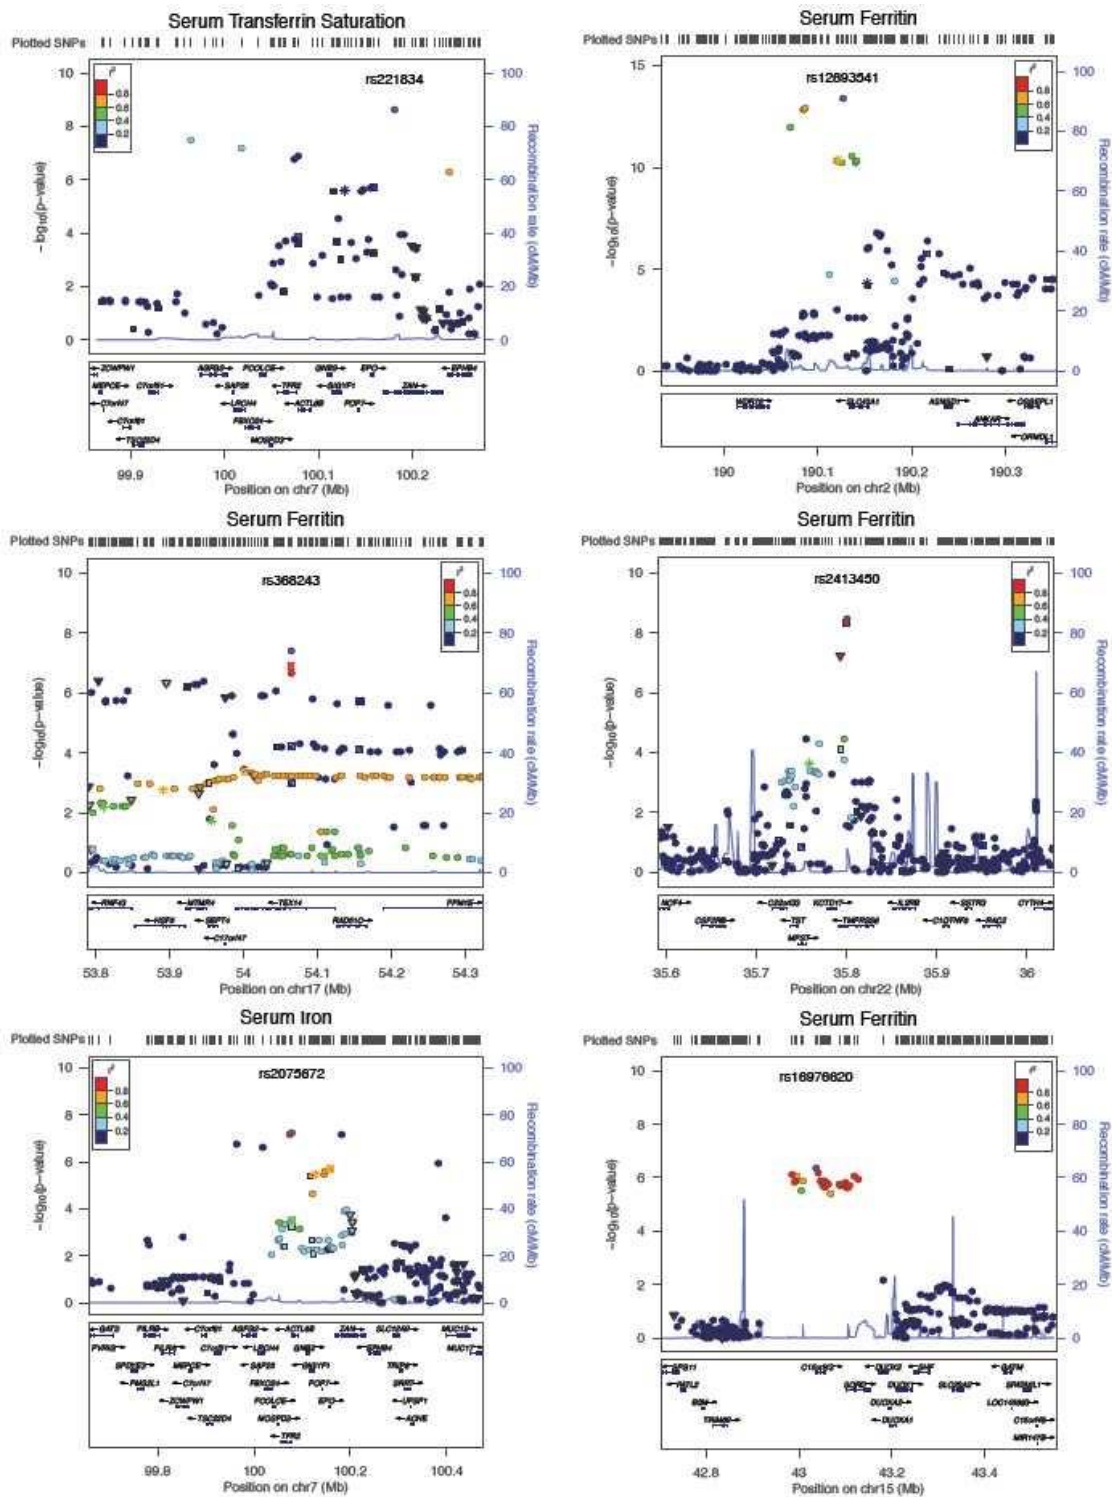

**Supplementary Figure 2 (continued).**

**DISCOVERY + REPLICATION** (data from Discovery meta-analysis only, but these loci become significant in the combined data)

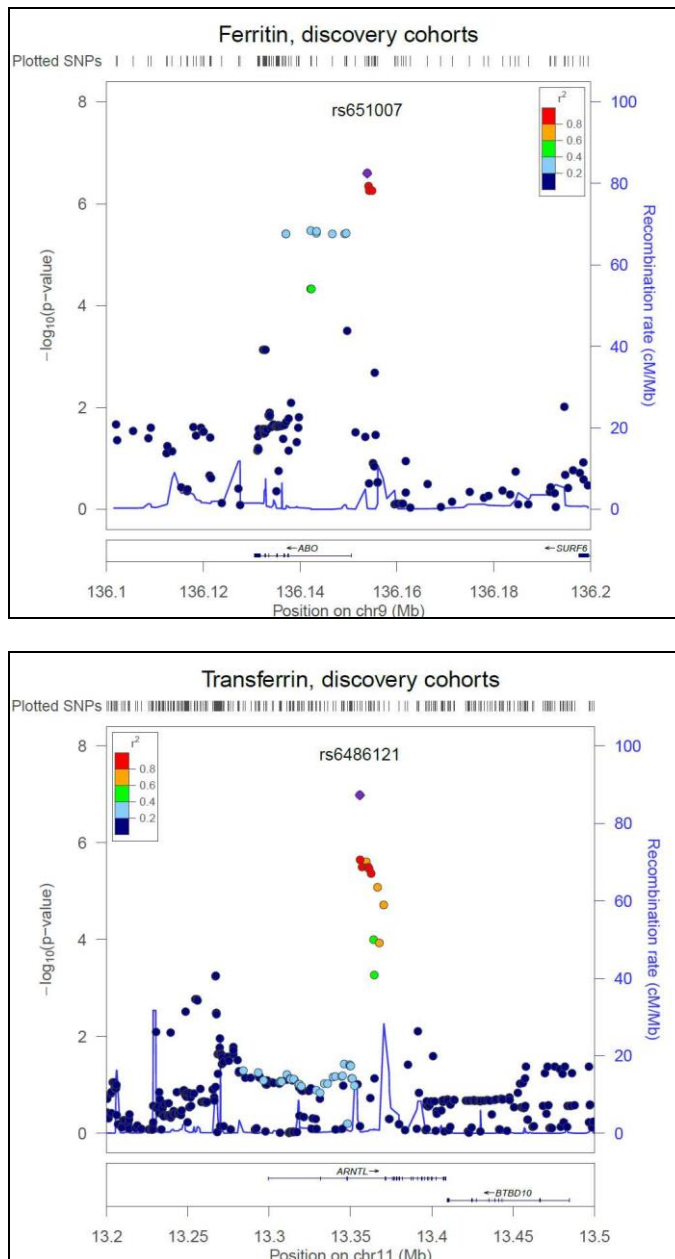

Supplementary Figure 2. Regional association plots for loci with significant results in meta-analysis of data from the Discovery cohorts or the Discovery + Replication cohorts.

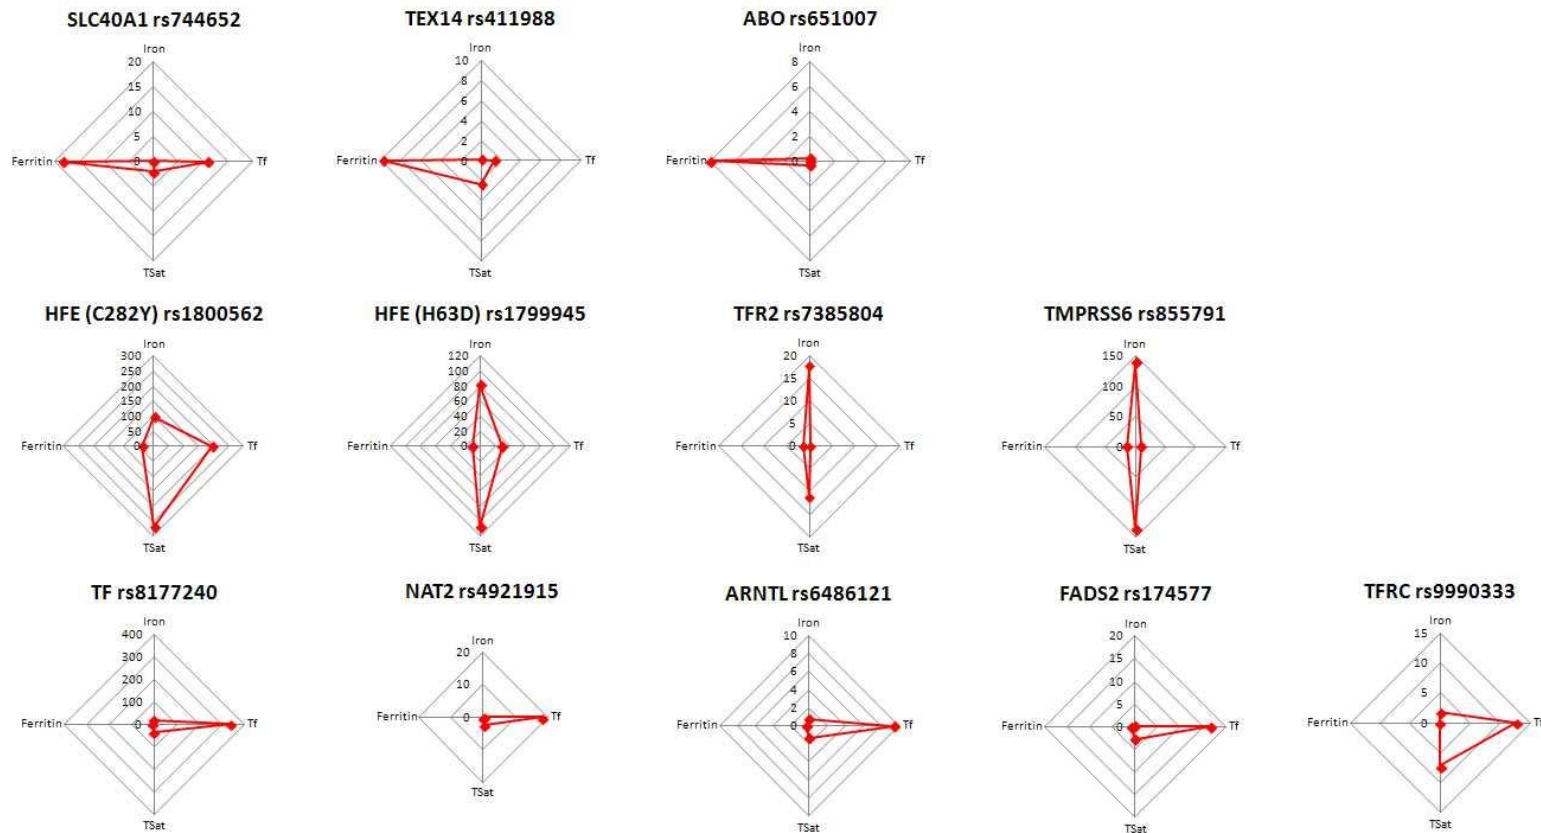

**Supplementary Figure 3.** Patterns of allelic effects on the four phenotypes, serum iron, transferrin, transferrin saturation and ferritin, for the most significant SNP at each locus (from the Discovery + Replication data). The top row shows loci which mainly affect ferritin, the second row shows loci which mainly affect iron and transferrin saturation, and loci in the bottom row mainly affect transferrin.

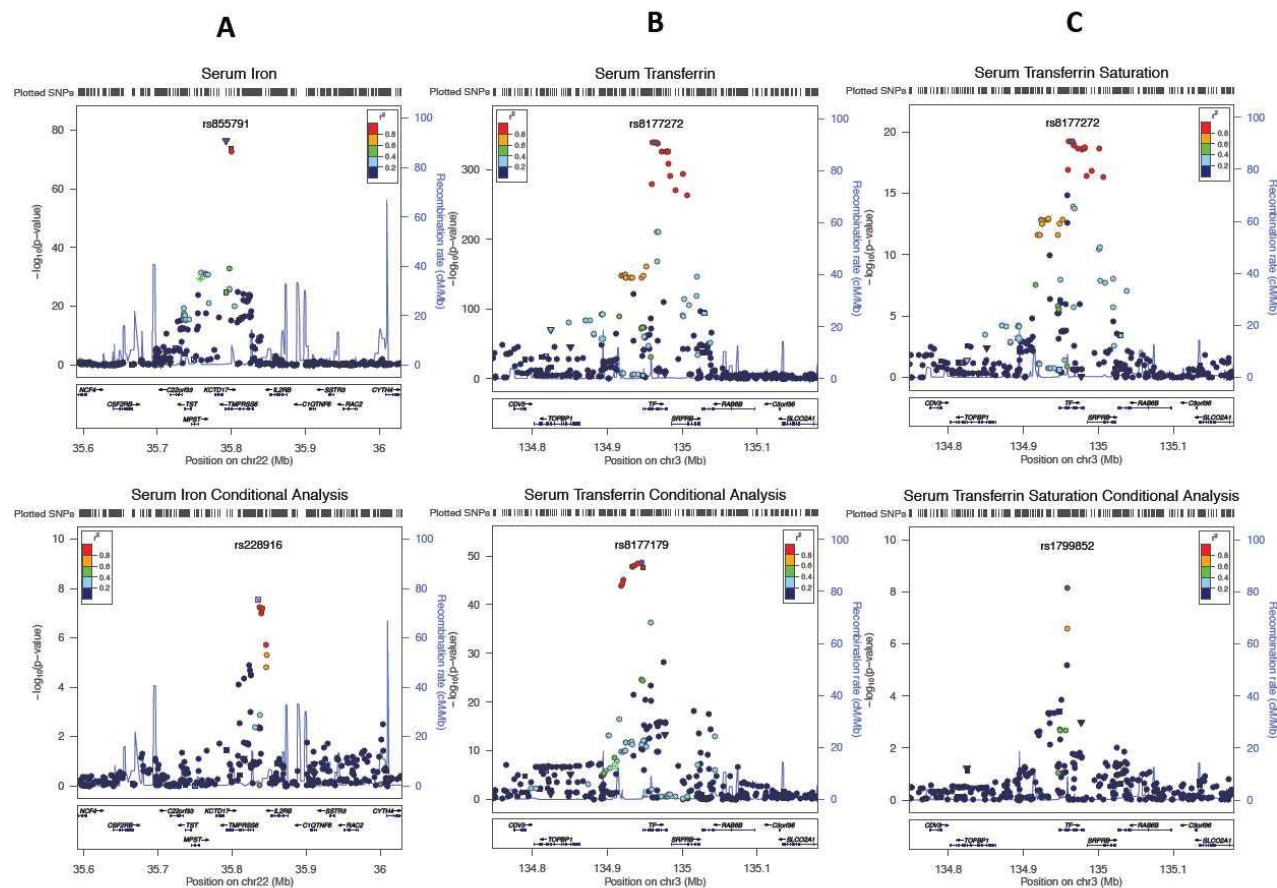

**Supplementary Figure 4.** Results from conditional analysis, in which original results (top panels) are compared with results obtained after including the lead SNP from the initial analysis as a covariate (bottom panels). A: serum iron at the *TMPRSS6* locus; B: serum transferrin at the *TF* locus; C: transferrin saturation at the *TF* locus.

Effects of adjustment for serum CRP on standardised betas for ferritin

| MarkerName | Chr | Gene               | Before inclusion of<br>CRP as covariate |       |          | After inclusion of<br>CRP as covariate |       |          | Beta After/<br>Beta Before |
|------------|-----|--------------------|-----------------------------------------|-------|----------|----------------------------------------|-------|----------|----------------------------|
|            |     |                    | Beta                                    | SE    | p        | Beta                                   | SE    | p        |                            |
| rs7603193  | 2   | <i>BCL11A</i>      | -0.129                                  | 0.027 | 1.38E-06 | -0.101                                 | 0.027 | 1.76E-04 | 78%                        |
| rs12693541 | 2   | <i>SLC40A1</i>     | -0.106                                  | 0.014 | 4.18E-14 | -0.067                                 | 0.014 | 1.70E-06 | 63%                        |
| rs4376025  | 3   | <i>CRBN-LRRN1</i>  | 0.046                                   | 0.010 | 3.62E-06 | 0.025                                  | 0.010 | 1.29E-02 | 54%                        |
| rs173780   | 5   | <i>FLJ37543</i>    | -0.068                                  | 0.015 | 3.35E-06 | -0.061                                 | 0.014 | 1.80E-05 | 90%                        |
| rs17236666 | 5   | <i>ISL1</i>        | 0.100                                   | 0.022 | 4.39E-06 | 0.093                                  | 0.022 | 2.76E-05 | 93%                        |
| rs1800562  | 6   | <i>HFE</i>         | 0.211                                   | 0.019 | 1.43E-29 | 0.176                                  | 0.020 | 1.63E-18 | 83%                        |
| rs9322487  | 6   | <i>RBM16-TIAM2</i> | 0.085                                   | 0.018 | 3.47E-06 | 0.060                                  | 0.019 | 1.50E-03 | 71%                        |
| rs651007   | 9   | <i>ABO</i>         | -0.060                                  | 0.012 | 2.54E-07 | -0.043                                 | 0.011 | 1.53E-04 | 72%                        |
| rs1752162  | 9   | <i>DENND1A</i>     | 0.061                                   | 0.013 | 4.80E-06 | 0.037                                  | 0.013 | 3.91E-03 | 61%                        |
| rs7395347  | 11  | <i>RAB6IP1</i>     | 0.045                                   | 0.010 | 3.20E-06 | 0.021                                  | 0.010 | 2.41E-02 | 47%                        |
| rs1050045  | 12  | <i>OS9</i>         | 0.043                                   | 0.009 | 4.12E-06 | 0.039                                  | 0.009 | 2.20E-05 | 91%                        |
| rs16976620 | 15  | <i>C15orf43</i>    | -0.081                                  | 0.016 | 4.52E-07 | -0.043                                 | 0.015 | 5.49E-03 | 53%                        |
| rs368243   | 17  | <i>TEX14</i>       | 0.051                                   | 0.009 | 3.80E-08 | 0.044                                  | 0.009 | 1.79E-06 | 86%                        |
| rs855791   | 22  | <i>TMPRSS6</i>     | -0.051                                  | 0.010 | 5.81E-08 | -0.043                                 | 0.010 | 5.60E-06 | 84%                        |
| Mean       |     |                    |                                         |       |          |                                        |       |          | 73.3%                      |
| SD         |     |                    |                                         |       |          |                                        |       |          | 15.4%                      |

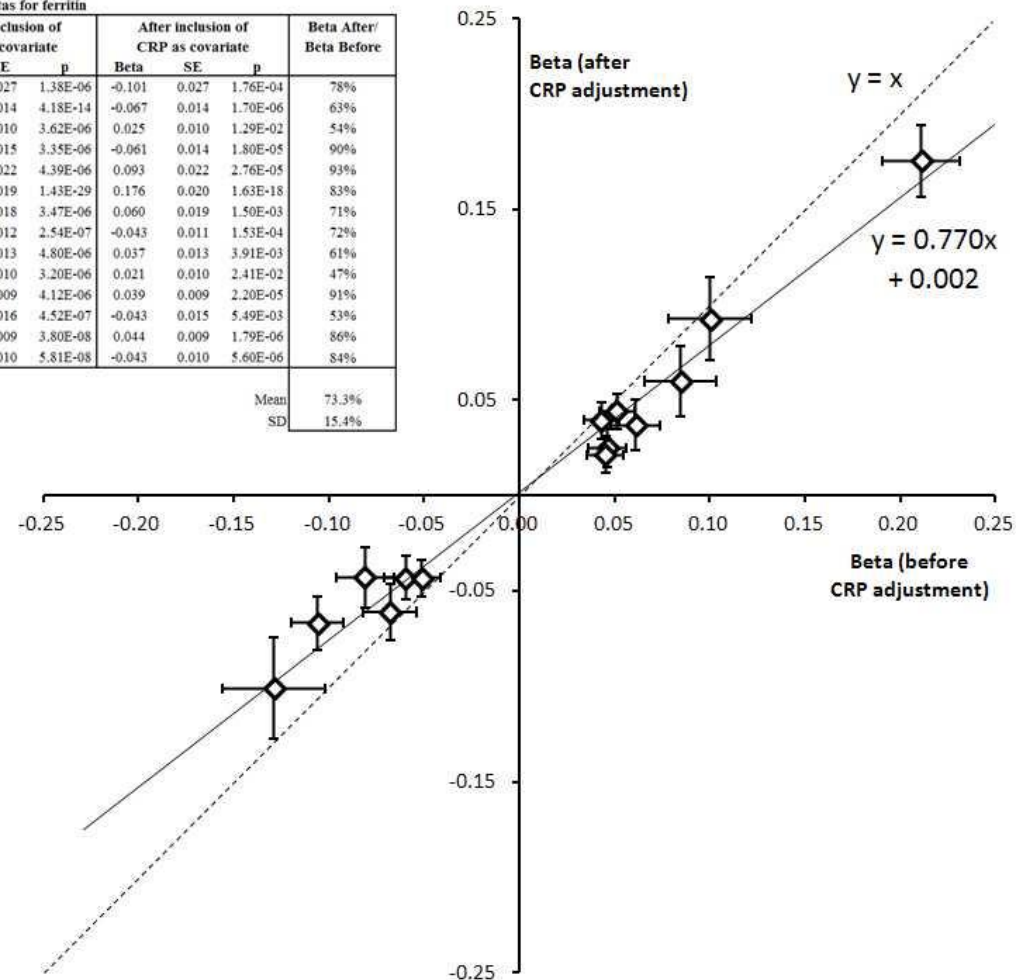

Showing effect sizes  
(bars show standard error).

Showing effect sizes  
(bars show standard error).

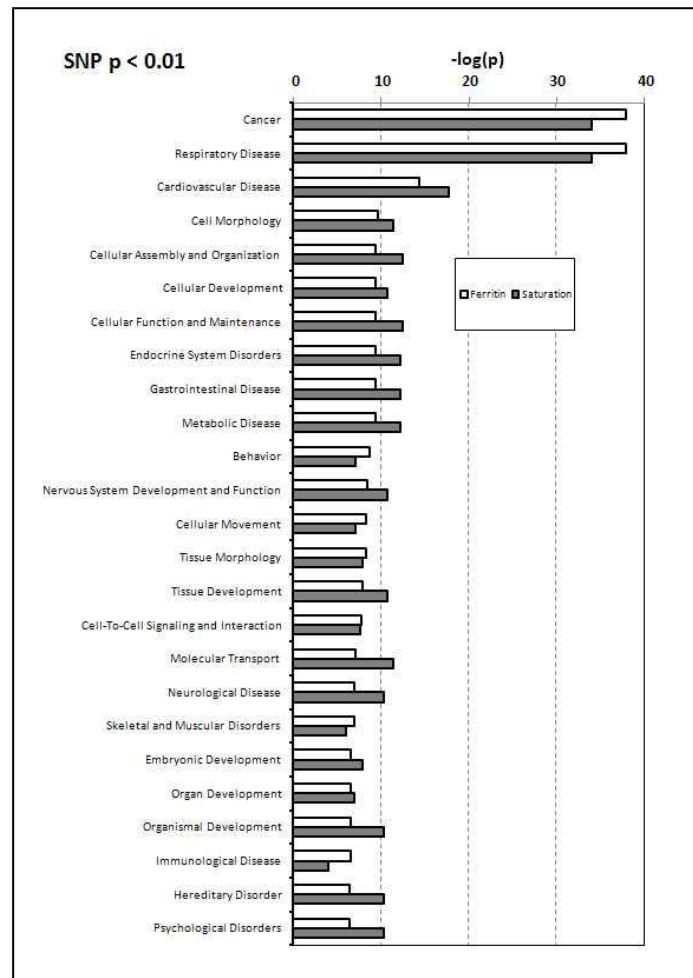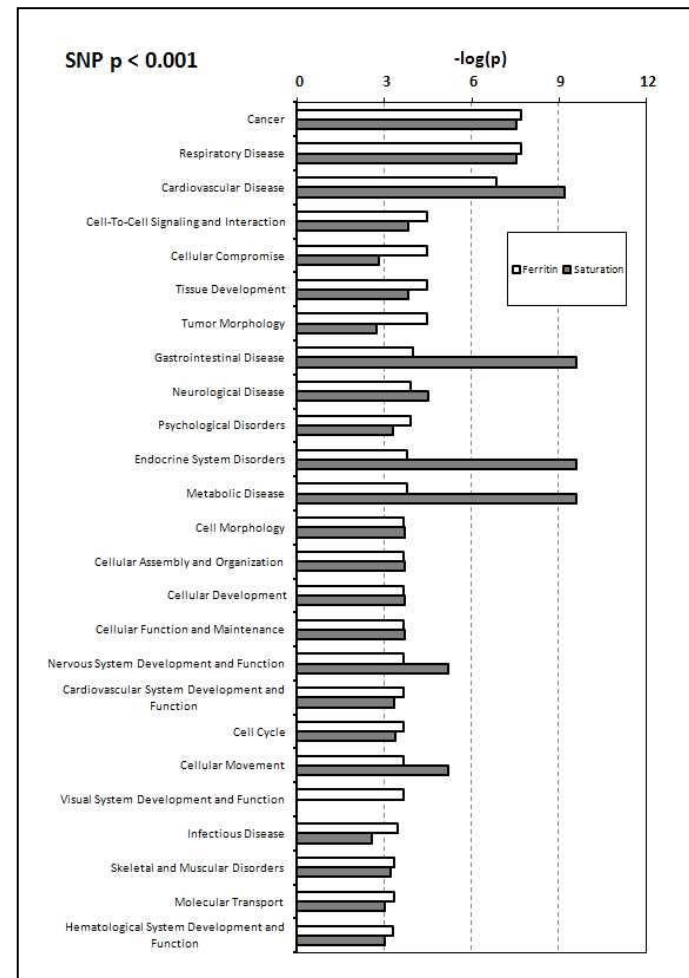

**Supplementary Figure 6.** Summary of disease and biological process overlap with genes identified through transferrin saturation and ferritin associations at  $p < 0.01$  and  $p < 0.001$ , using Ingenuity Pathway Analysis.

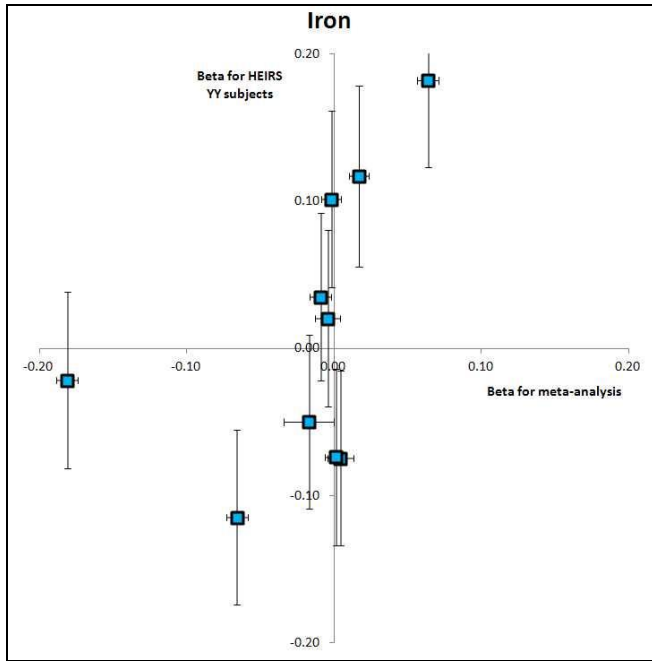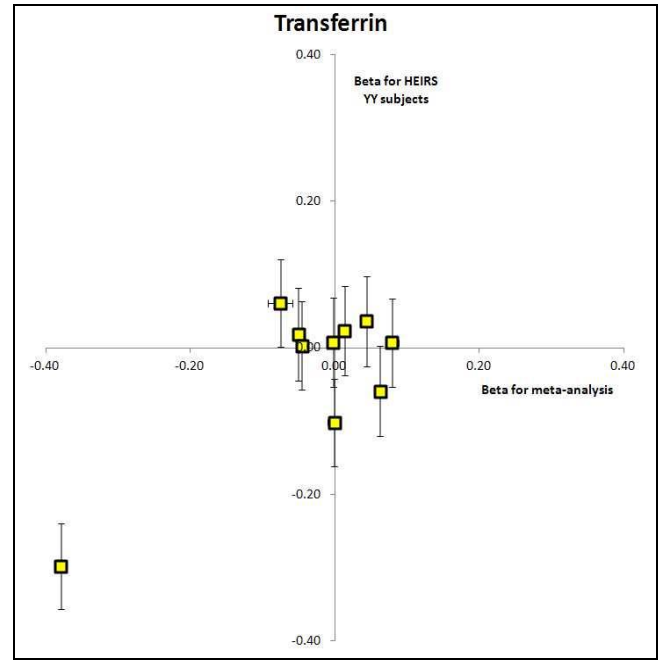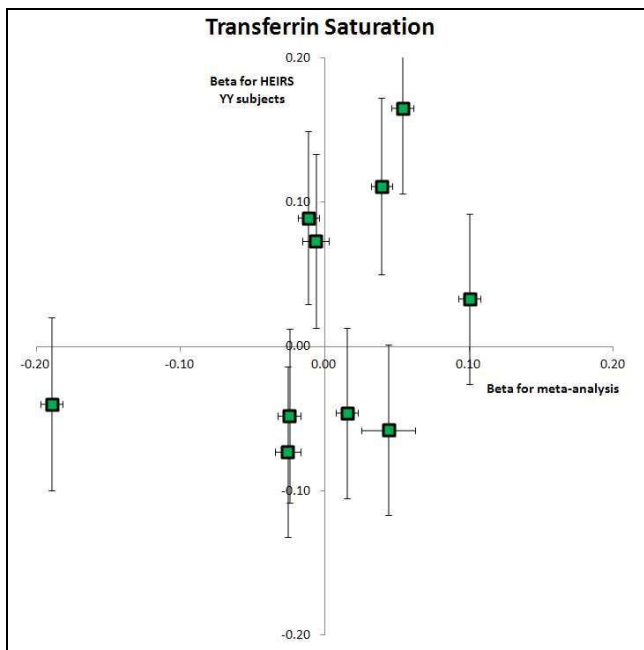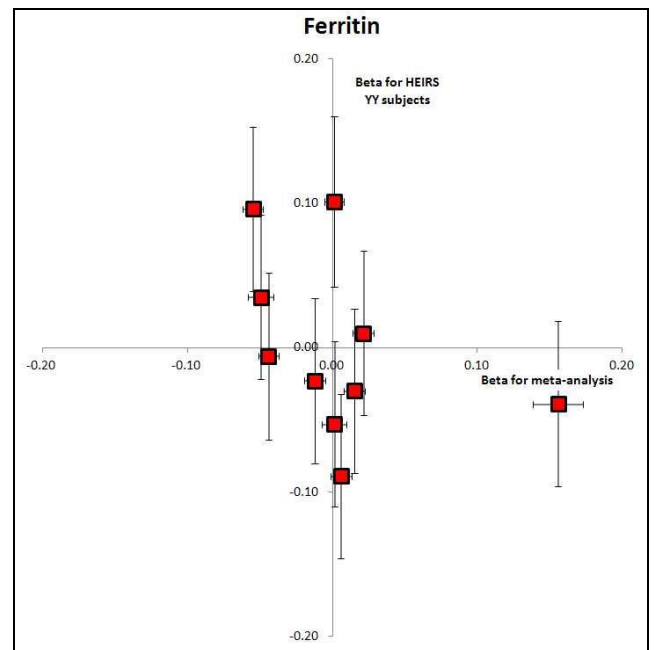

**Supplementary Figure 7.** Comparison of allelic effects in Discovery + Replication meta-analysis and in C282Y homozygotes from the HEIRS study. Error bars show standard errors for betas.

## Supplementary Tables

**Supplementary Table 1.** Cohort information and acknowledgements

| Cohort Name                        | Cohort description, ethical approvals and references                                                                                                                                                                                                                                                                                                                                                                                                                                                                                                                                                                                                                                                                                                                                                                                                                                                                                                                                                       | Acknowledgements<br>Financial support                                                                                                                                                                                                                                                                                                                                                           | Acknowledgements<br>Other                                                                                         |
|------------------------------------|------------------------------------------------------------------------------------------------------------------------------------------------------------------------------------------------------------------------------------------------------------------------------------------------------------------------------------------------------------------------------------------------------------------------------------------------------------------------------------------------------------------------------------------------------------------------------------------------------------------------------------------------------------------------------------------------------------------------------------------------------------------------------------------------------------------------------------------------------------------------------------------------------------------------------------------------------------------------------------------------------------|-------------------------------------------------------------------------------------------------------------------------------------------------------------------------------------------------------------------------------------------------------------------------------------------------------------------------------------------------------------------------------------------------|-------------------------------------------------------------------------------------------------------------------|
| <b>Discovery Cohorts:</b>          |                                                                                                                                                                                                                                                                                                                                                                                                                                                                                                                                                                                                                                                                                                                                                                                                                                                                                                                                                                                                            |                                                                                                                                                                                                                                                                                                                                                                                                 |                                                                                                                   |
| Australia- Adult                   | <p>Study participants comprised (a) adult twins, their spouses and first-degree relatives who volunteered for studies on risk factors or biomarkers for physical or psychiatric conditions; (b) people with self-reported migraine or endometriosis and unaffected relatives. These studies were approved by The Queensland Institute of Medical Research Human Research Ethics Committee and, for the studies on alcohol and nicotine genetics, also by Washington University School of Medicine Human Subjects Committee.</p> <p>Benyamin et al. Common variants in TMPRSS6 are associated with iron status and erythrocyte volume. Nat Genet. 2009;41:1173-5. PMID 19820699</p> <p>Painter et al. Genome-wide association study identifies a locus at 7p15.2 associated with endometriosis. Nat Genet. 2011;43:51-4. PMID: 21151130</p> <p>Anttila et al. Genome-wide association study of migraine implicates a common susceptibility variant on 8q22.1. Nat Genet. 2010;42:869-73. PMID: 20802479</p> | <p>We acknowledge funding from the Australian National Health and Medical Research Council (NHMRC grants 241944, 389875, 389891,389892, 389938, 442915, 442981, 496739 and 552485), US National Institutes of Health (NIH grants AA07535, AA10248 and AA014041) and the Australian Research Council (ARC grant DP0770096). D.R.N. and G.W.M . are supported by the NHMRC Fellowship Scheme.</p> |                                                                                                                   |
| Australia-Adolescent               | <p>Adolescent twins and their non-twin siblings who participated in studies on skin cancer risk factors at ages 12 and 14, and on cognition at age 16. These studies were approved by The Queensland Institute of Medical Research Human Research Ethics Committee, and both the participants and their parents or guardians gave informed consent.</p> <p>Middelberg RPS, Martin NG, Whitfield JB. A longitudinal genetic study of plasma lipids in adolescent twins. Twin Research and Human Genetics 2007;10:127-135.</p> <p>Powell JE, Henders AK, McRae AF, et al. The Brisbane Systems Genetics Study: genetical genomics meets complex trait genetics. PLoS One. 2012;7:e35430.</p>                                                                                                                                                                                                                                                                                                                 | <p>Financial support for aspects of the adolescent studies was provided by grants from the National Health and Medical Research Council of Australia, and the National Institute on Alcohol Abuse and Alcoholism (AA007535, AA014041).</p>                                                                                                                                                      |                                                                                                                   |
| Estonian Biobank (original cohort) | <p>The Estonian cohort comes from the population-based biobank of the Estonian Genome Project of University of Tartu (EGCUT). The project is conducted according to the Estonian Gene Research Act and all</p>                                                                                                                                                                                                                                                                                                                                                                                                                                                                                                                                                                                                                                                                                                                                                                                             | <p>This work was supported by the Targeted Financing from the Estonian Ministry of Science and Education [SF0180142s08];</p>                                                                                                                                                                                                                                                                    | <p>We acknowledge EGCUT technical personnel, especially Mr V. Soo and S. Smit. Data analyzes were carried out</p> |

| Cohort Name   | Cohort description, ethical approvals and references                                                                                                                                                                                                                                                                                                                                                                                                                                                                                                                                                                                                                                                                                                                                                                                                                                                                                                                                                                                                                                                                                                                                                                                                                                     | Acknowledgements<br>Financial support                                                                                                                                                                                                                                                                                                                                                                                                                                           | Acknowledgements<br>Other                                                                                           |
|---------------|------------------------------------------------------------------------------------------------------------------------------------------------------------------------------------------------------------------------------------------------------------------------------------------------------------------------------------------------------------------------------------------------------------------------------------------------------------------------------------------------------------------------------------------------------------------------------------------------------------------------------------------------------------------------------------------------------------------------------------------------------------------------------------------------------------------------------------------------------------------------------------------------------------------------------------------------------------------------------------------------------------------------------------------------------------------------------------------------------------------------------------------------------------------------------------------------------------------------------------------------------------------------------------------|---------------------------------------------------------------------------------------------------------------------------------------------------------------------------------------------------------------------------------------------------------------------------------------------------------------------------------------------------------------------------------------------------------------------------------------------------------------------------------|---------------------------------------------------------------------------------------------------------------------|
|               | <p>participants have signed the broad informed consent (www.biobank.ee). In total, 52 000 individuals aged 18 years or older participated in this cohort (33% men, 67% women). The population distributions of the cohort reflect those of the Estonian population (83% Estonians, 14% Russians and 3% other). General practitioners (GP) and physicians in the hospitals randomly recruited the participants. A Computer-Assisted Personal interview was conducted during 1–2 h at doctors' offices. Data on demographics, genealogy, educational and occupational history, lifestyle and anthropometric and physiological data were assessed. These studies were approved by the Research Ethics Committee of the University of Tartu.</p> <p>Website: <a href="http://www.biobank.ee/">http://www.biobank.ee/</a><br/>Leitsalu L, et al. Cohort Profile: Estonian Biobank of the Estonian Genome Center, University of Tartu. Int J Epidemiol. 2014 Feb 11.</p>                                                                                                                                                                                                                                                                                                                       | <p>the US National Institute of Health [R01DK075787]; the Development Fund of the University of Tartu (grant SP1GVARENG); the European Regional Development Fund to the Centre of Excellence in Genomics (EXCEGEN; grant 3.2.0304.11-0312); and through FP7 grant 313010.</p>                                                                                                                                                                                                   | <p>in part in the High Performance Computing Center of University of Tartu.</p>                                     |
| Kora (F3, F4) | <p>The KORA study is a series of independent population-based epidemiological surveys of participants living in the region of Augsburg, Southern Germany. All survey participants are residents of German nationality identified through the registration office and were examined in 1994/95 (KORA S3) and 1999/2001 (KORA F4). In the KORA S3 and S4 studies 4,856 and 4,261 subjects have been examined implying response rates of 75% and 67%, respectively. 3,006 subjects participated in a 10-year follow-up examination of S3 in 2004/05 (KORA F3), and 3080 of S4 in 2006/2008 (KORA F4). Individuals for genotyping in KORA F3 and KORA F4 were randomly selected. The age range of the participants was 25 to 74 years of recruitment. Informed consent has been given by all participants. The study has been approved by the local ethics committee (Ethik-Kommission der Bayerische Landesärztekammer).</p> <p>Holle R, Happich M, Löwel H, Wichmann HE (2005) KORA—a research platform for population based health research. Gesundheitswesen 2005 Aug;67(Suppl 1): S19–25.<br/>Wichmann H-E, Gieger C, Illig T (2005) KORA-gen—resource for population genetics, controls and a broad spectrum of disease phenotypes. Gesundheitswesen 2005Aug ;67(Suppl 1): S26–30.</p> | <p>The KORA research platform (KORA, Cooperative Health Research in the Region of Augsburg) was initiated and financed by the Helmholtz Zentrum München - German Research Center for Environmental Health, which is funded by the German Federal Ministry of Education and Research and by the State of Bavaria. Furthermore, KORA research was supported within the Munich Center of Health Sciences (MC Health), Ludwig-Maximilians-Universität, as part of LMUinnovativ.</p> |                                                                                                                     |
| Val Borbera   | <p>Val Borbera: The INGI-Val Borbera population is a collection of 1,664 genotyped samples collected in the Val Borbera Valley, a geographically isolated valley located within the Appennine Mountains</p>                                                                                                                                                                                                                                                                                                                                                                                                                                                                                                                                                                                                                                                                                                                                                                                                                                                                                                                                                                                                                                                                              | <p>The research was supported by funds from Compagnia di San Paolo, Torino, Italy; Fondazione Cariplo, Italy and</p>                                                                                                                                                                                                                                                                                                                                                            | <p>We thank the inhabitants of the VB that made this study possible, the local administrations, the Tortona and</p> |

| Cohort Name                     | Cohort description, ethical approvals and references                                                                                                                                                                                                                                                                                                                                                                                                                                                                                                                                                                                                                                                                                                                                                                                                                                                                                                                                                                                                                                                                                                                                                                                                                                                                                                                                                                                                                                                                                                                                                                                                                                                         | Acknowledgements<br>Financial support                                                                                                                                                                                                                                                                                    | Acknowledgements<br>Other                                                                                                                                                                                                                                                                                                                                               |
|---------------------------------|--------------------------------------------------------------------------------------------------------------------------------------------------------------------------------------------------------------------------------------------------------------------------------------------------------------------------------------------------------------------------------------------------------------------------------------------------------------------------------------------------------------------------------------------------------------------------------------------------------------------------------------------------------------------------------------------------------------------------------------------------------------------------------------------------------------------------------------------------------------------------------------------------------------------------------------------------------------------------------------------------------------------------------------------------------------------------------------------------------------------------------------------------------------------------------------------------------------------------------------------------------------------------------------------------------------------------------------------------------------------------------------------------------------------------------------------------------------------------------------------------------------------------------------------------------------------------------------------------------------------------------------------------------------------------------------------------------------|--------------------------------------------------------------------------------------------------------------------------------------------------------------------------------------------------------------------------------------------------------------------------------------------------------------------------|-------------------------------------------------------------------------------------------------------------------------------------------------------------------------------------------------------------------------------------------------------------------------------------------------------------------------------------------------------------------------|
|                                 | <p>in Northwest Italy<sup>1</sup>. The valley is inhabited by about 3,000 descendants from the original population, living in 7 villages along the valley and in the mountains. Participants were healthy people 18-102 years of age that had at least one grandfather living in the valley. The study plan and the informed consent form were reviewed and approved by the institutional review boards of San Raffaele Hospital in Milan.</p> <p>Traglia, M. et al. Heritability and demographic analyses in the large isolated population of Val Borbera suggest advantages in mapping complex traits genes. PLoS One 4, e7554 (2009).†</p> <p>Colonna V, et al. Small effective population size and genetic homogeneity in the Val Borbera isolate. Eur J Hum Genet. 2):89-94. 2013</p>                                                                                                                                                                                                                                                                                                                                                                                                                                                                                                                                                                                                                                                                                                                                                                                                                                                                                                                   | <p>Ministry of Health, Ricerca Finalizzata 2008 and CCM 2010, PRIN 2009 and Telethon, Italy to DT. The funders had no role in study design, data collection and analysis, decision to publish, or preparation of the manuscript.</p>                                                                                     | <p>Genova archdiocese and the ASL-22, Novi Ligure (AI) for support.</p> <p>We also thank Fiammetta Viganò for technical help, Corrado Masciullo and Massimiliano Cocca for building the analysis platform.</p>                                                                                                                                                          |
| NBS (Nijmegen Biomedical Study) | <p>The Nijmegen Biomedical Study (NBS; <a href="http://www.nijmegenbiomedischestudie.nl">http://www.nijmegenbiomedischestudie.nl</a>) is a population-based survey conducted by the Department for Health Evidence and the Department of Laboratory Medicine of the Radboud University Medical Centre, Nijmegen, The Netherlands. The study has been described before (1). Briefly, in 2002, 22,451 age and sex-stratified randomly selected adult inhabitants of Nijmegen, a city located in the eastern part of the Netherlands, received an invitation to fill out a postal questionnaire (QN) including questions about lifestyle, health status, and medical history, and to donate a blood sample for DNA isolation and biochemical studies. A total of 9350 (43%) persons filled out the QN, of which 6468 (69%) donated blood samples. A second, third and fourth questionnaire were sent out in 2005, 2008 and 2012, respectively. Approval to conduct the NBS was obtained from the Radboud University Medical Centre Institutional Review Board. All participants gave written informed consent for participation in the NBS. For this study we used the subset of 1980 NBS participants that was selected to serve as controls in GWAS (2).</p> <p>1. Hoogendoorn EH, Hermus AR, de Vegt F, Ross HA, Verbeek AL, Kiemeny LA, Swinkels DW, Sweep FC, den Heijer M. Thyroid function and prevalence of anti-thyroperoxidase antibodies in a population with borderline sufficient iodine intake: influences of age and sex. Clin Chem 2006;52:104-11.</p> <p>2. Kiemeny LA, Thorlacius S, Sulem P, et al. Sequence variant on 8q24 confers susceptibility to urinary bladder cancer. Nat Genet</p> | <p>This work was sponsored by the Stichting Nationale Computerfaciliteiten (National Computing Facilities Foundation, NCF) for the use of supercomputer facilities, with financial support from the Nederlandse Organisatie voor Wetenschappelijk Onderzoek (Netherlands Organization for Scientific Research, NWO).</p> | <p>The Nijmegen Biomedical Study is a population-based survey conducted at the Department for Health Evidence, and the Department of Laboratory Medicine of the Radboud University Medical Centre. Principal investigators of the Nijmegen Biomedical Study are Lambertus A. Kiemeny, Martin den Heijer, André L.M. Verbeek, Dorine W. Swinkels and Barbara Franke.</p> |

| Cohort Name   | Cohort description, ethical approvals and references                                                                                                                                                                                                                                                                                                                                                                                                                                                                                                                                                                                                                                                                                                                                                                                                                                                                                                                                                                                                                                                                                                                                                                                                                                                                                                                                                                                                                                    | Acknowledgements<br>Financial support                                                                                                                                                                                       | Acknowledgements<br>Other                                                                                                                                                                                                                                                                          |
|---------------|-----------------------------------------------------------------------------------------------------------------------------------------------------------------------------------------------------------------------------------------------------------------------------------------------------------------------------------------------------------------------------------------------------------------------------------------------------------------------------------------------------------------------------------------------------------------------------------------------------------------------------------------------------------------------------------------------------------------------------------------------------------------------------------------------------------------------------------------------------------------------------------------------------------------------------------------------------------------------------------------------------------------------------------------------------------------------------------------------------------------------------------------------------------------------------------------------------------------------------------------------------------------------------------------------------------------------------------------------------------------------------------------------------------------------------------------------------------------------------------------|-----------------------------------------------------------------------------------------------------------------------------------------------------------------------------------------------------------------------------|----------------------------------------------------------------------------------------------------------------------------------------------------------------------------------------------------------------------------------------------------------------------------------------------------|
|               | 2008;40:1307-12.                                                                                                                                                                                                                                                                                                                                                                                                                                                                                                                                                                                                                                                                                                                                                                                                                                                                                                                                                                                                                                                                                                                                                                                                                                                                                                                                                                                                                                                                        |                                                                                                                                                                                                                             |                                                                                                                                                                                                                                                                                                    |
| Cambridge     | <p>The UK Blood Services (UKBS) Common Controls Panel 1 and 2 (UKBS - CC1 and UKBS - CC2) is a national collection of 3,000 DNA samples from the 12 health regions of Great Britain established in 2005 - 2006 by a partnership between NHS Blood and Transplant (NHSBT) of England, the Scottish National Blood Transfusion Service and the Welsh Blood Service. The Common Controls collection was established for use as the shared controls in the WTCCC Genome - Wide Association Studies (WGAS), and was approved by the Peterborough &amp; Fenland Local Research Ethics Committee</p> <p>Wellcome Trust Case Control Consortium. Genome - wide association study of 14, 000 cases of seven common diseases and 3,000 shared controls. Nature 447 , 661 - 78 (2007).</p>                                                                                                                                                                                                                                                                                                                                                                                                                                                                                                                                                                                                                                                                                                         | Research in the Ouwehand laboratory is supported by program grants from the National Institute for Health Research (NIHR) to WHO and the British Heart Foundation (to AR) under numbers RP-PG-0310-1002 and RG/09/12/28096. |                                                                                                                                                                                                                                                                                                    |
| Micros/EURAC  | <p>The MICROS study is part of the genomic health care program 'GenNova' and was carried out in three villages of the Val Venosta, South Tyrol (Italy), in 2001-2003. It comprised members of the populations of Stelvio, Vallelunga and Martello. A detailed description of the MICROS study is available elsewhere (Pattaro et al. 2007). Briefly, study participants were volunteers from three isolated villages located in the Italian Alps, in a German-speaking region bordering with Austria and Switzerland. Owing to geographical, historical and political reasons, the entire region experienced a prolonged period of isolation from surrounding populations. Information on the participant's health status was collected through a standardized questionnaire. Laboratory data were obtained from standard blood analyses. The study participants are connected among each other in a unique genealogy for the three villages. The study was approved by the <a href="#">Landesethikkomitee</a> (ethics committee) of the autonomous province of Bolzano.</p> <p>Pattaro C, Marroni F, Riegler A, Mascalzoni D, Pichler I, Volpato CB, Dal Cero U, De Grandi A, Egger C, Eisendle A, Fuchsberger C, Gögele M, Pedrotti S, Pinggera GK, Stefanov SA, Vogl FD, Wiedermann CJ, Meitinger T, Pramstaller PP. The genetic study of three population microisolates in South Tyrol (MICROS): study design and epidemiological perspectives. BMC Med Genet. 2007 Jun 5;8:29.</p> | The study was supported by the Ministry of Health and Department of Educational Assistance, University and Research of the Autonomous Province of Bolzano and the South Tyrolean Sparkasse Foundation.                      | For the MICROS study, we thank the primary care practitioners Raffaella Stocker, Stefan Waldner, Toni Pizzecco, Josef Plangger, Ugo Marcadent and the personnel of the Hospital of Silandro (Department of Laboratory Medicine) for their participation and collaboration in the research project. |
| ERF/Rotterdam | The Erasmus Rucphen Family study is part of the Genetic Research in Isolated Populations (GRIP) program. It is a cross-sectional population-based study that includes over 3000 participants descending from 22                                                                                                                                                                                                                                                                                                                                                                                                                                                                                                                                                                                                                                                                                                                                                                                                                                                                                                                                                                                                                                                                                                                                                                                                                                                                         | ERF: The genotyping for the ERF study was supported by EUROSPAN (European Special Populations Research Network)                                                                                                             |                                                                                                                                                                                                                                                                                                    |

| Cohort Name                           | Cohort description, ethical approvals and references                                                                                                                                                                                                                                                                                                                                                                                                                                                                                                                                                                                                                                                                                                                                                                                                                                                                                                                                                                                                                                                                                                                                                                                 | Acknowledgements<br>Financial support                                                                                                                                                                                                                                                                                                                                                                                                                                                                                                                                                                                | Acknowledgements<br>Other                                                                                                                         |
|---------------------------------------|--------------------------------------------------------------------------------------------------------------------------------------------------------------------------------------------------------------------------------------------------------------------------------------------------------------------------------------------------------------------------------------------------------------------------------------------------------------------------------------------------------------------------------------------------------------------------------------------------------------------------------------------------------------------------------------------------------------------------------------------------------------------------------------------------------------------------------------------------------------------------------------------------------------------------------------------------------------------------------------------------------------------------------------------------------------------------------------------------------------------------------------------------------------------------------------------------------------------------------------|----------------------------------------------------------------------------------------------------------------------------------------------------------------------------------------------------------------------------------------------------------------------------------------------------------------------------------------------------------------------------------------------------------------------------------------------------------------------------------------------------------------------------------------------------------------------------------------------------------------------|---------------------------------------------------------------------------------------------------------------------------------------------------|
|                                       | <p>couples who lived in the Rucphen region in the southwest Netherlands and had at least 6 children baptized in the community church between 1850 and 1900 . All living descendants of these pairs (as well as their spouses), ascertained on the basis of municipal and baptismal records, were traced and invited to participate (n = 3000 ). Selection of the study participants was not based on any disease. The Medical Ethical Committee of the Erasmus Medical Center, Rotterdam approved the study and informed consent was obtained from all participants.</p> <p>Aulchenko YS, Heutink P, Mackay I, et al. Linkage disequilibrium in young genetically isolated Dutch population. Eur J Hum Genet 2004;12:527-34. PMID:15054401</p>                                                                                                                                                                                                                                                                                                                                                                                                                                                                                       | <p>and the European Commission FP6 STRP grant (018947; LSHG-CT-2006-01947). The ERF study was further supported by grants from the Netherlands Organisation for Scientific Research, Erasmus MC, the Centre for Medical Systems Biology (CMSB) and the Netherlands Brain Foundation (HersenStichting Nederland). We are grateful to all participating individuals and their relatives, general practitioners and neurologists for their contributions and to P. Veraart for her help in genealogy, Jeannette Vergeer for the supervision of the laboratory work and P. Snijders for his help in data collection.</p> |                                                                                                                                                   |
| Busselton Health Study                | <p>Residents of the town of Busselton in the southwest of Western Australia have been involved in a series of health surveys since 1966.a The population is predominantly of European origin. In 1994/95 there was a follow-up study involving a subset of those who had attended any of the previous surveys. Cases of asthma were defined as those who reported doctor-diagnosed asthma at any survey that they attended from 1966 to 1994 (answer 'Yes' to 'Has your doctor ever told you that you had asthma?').b Controls are those who have consistently answered 'No' to 'Has your doctor ever told you that you had asthma?' at all previous surveys that they have attended from 1996 to 1994. For the GWA study, a case control sample of unrelated individuals was selected. After QC a total of 1,207 subjects were retained in the GWAS analyses. Ethical approval was obtained through the Human Research Ethics Office, University of Western Australia<br/>Website: <a href="http://www.busseltonhealthstudy.com/">http://www.busseltonhealthstudy.com/</a><br/>James AL, Knuiman MW, Divitini ML et al. Changes in the prevalence of asthma in adults since 1966: the Busselton Health Study. Eur Respir J 2009</p> | <p>The Busselton Health Study (BHS) acknowledges the generous support for the 1994/5 follow-up study from Healthway, Western Australia and the numerous Busselton community volunteers who assisted with data collection and the study participants from the Shire of Busselton. The Busselton Health Study is supported by The Great Wine Estates of the Margaret River region of Western Australia.</p>                                                                                                                                                                                                            |                                                                                                                                                   |
| <b>Replication Cohorts:</b>           |                                                                                                                                                                                                                                                                                                                                                                                                                                                                                                                                                                                                                                                                                                                                                                                                                                                                                                                                                                                                                                                                                                                                                                                                                                      |                                                                                                                                                                                                                                                                                                                                                                                                                                                                                                                                                                                                                      |                                                                                                                                                   |
| Estonian Biobank (replication cohort) | <p>The Estonian cohort comes from the population-based biobank of the Estonian Genome Project of University of Tartu (EGCUT). The project is conducted according to the Estonian Gene Research Act and all participants have signed the broad informed consent</p>                                                                                                                                                                                                                                                                                                                                                                                                                                                                                                                                                                                                                                                                                                                                                                                                                                                                                                                                                                   | <p>This work was supported by the Targeted Financing from the Estonian Ministry of Science and Education [SF0180142s08]; the US National Institute of Health</p>                                                                                                                                                                                                                                                                                                                                                                                                                                                     | <p>We acknowledge EGCUT technical personnel, especially Mr V. Soo and S. Smit. Data analyzes were carried out in part in the High Performance</p> |

| Cohort Name | Cohort description, ethical approvals and references                                                                                                                                                                                                                                                                                                                                                                                                                                                                                                                                                                                                                                                                                                                                                                                                                                                                                                                                                                                                                                                                                                                                                                                                                                                                                                                                                                                       | Acknowledgements<br>Financial support                                                                                                                                                                                                      | Acknowledgements<br>Other                       |
|-------------|--------------------------------------------------------------------------------------------------------------------------------------------------------------------------------------------------------------------------------------------------------------------------------------------------------------------------------------------------------------------------------------------------------------------------------------------------------------------------------------------------------------------------------------------------------------------------------------------------------------------------------------------------------------------------------------------------------------------------------------------------------------------------------------------------------------------------------------------------------------------------------------------------------------------------------------------------------------------------------------------------------------------------------------------------------------------------------------------------------------------------------------------------------------------------------------------------------------------------------------------------------------------------------------------------------------------------------------------------------------------------------------------------------------------------------------------|--------------------------------------------------------------------------------------------------------------------------------------------------------------------------------------------------------------------------------------------|-------------------------------------------------|
|             | <p>(www.biobank.ee). In total, 52 000 individuals aged 18 years or older participated in this cohort (33% men, 67% women). The population distributions of the cohort reflect those of the Estonian population (83% Estonians, 14% Russians and 3% other). General practitioners (GP) and physicians in the hospitals randomly recruited the participants. A Computer-Assisted Personal interview was conducted during 1–2 h at doctors' offices. Data on demographics, genealogy, educational and occupational history, lifestyle and anthropometric and physiological data were assessed. These studies were approved by the Research Ethics Committee of the University of Tartu.</p> <p>Website: <a href="http://www.biobank.ee/">http://www.biobank.ee/</a></p> <p>Leitsalu L, et al. Cohort Profile: Estonian Biobank of the Estonian Genome Center, University of Tartu. Int J Epidemiol. 2014 Feb 11.</p>                                                                                                                                                                                                                                                                                                                                                                                                                                                                                                                          | <p>[R01DK075787]; the Development Fund of the University of Tartu (grant SP1GVARENG); the European Regional Development Fund to the Centre of Excellence in Genomics (EXCEGEN; grant 3.2.0304.11-0312); and through FP7 grant 313010.</p>  | <p>Computing Center of University of Tartu.</p> |
| InCHIANTI   | <p>The InCHIANTI study is a population-based epidemiological study aimed at evaluating the factors that influence mobility in the older population living in the Chianti region in Tuscany, Italy. The details of the study have been previously reported[1]. Briefly, 1616 residents were selected from the population registry of Greve in Chianti (a rural area: 11,709 residents with 19.3% of the population greater than 65 years of age), and Bagno a Ripoli (Antella village near Florence; 4,704 inhabitants, with 20.3% greater than 65 years of age). The participation rate was 90% (n=1453), and the subjects ranged between 21-102 years of age. Overnight fasted blood samples were for genomic DNA extraction, and measurement of iron-related traits. Illumina Infinium HumanHap 550K SNP arrays were used for genotyping [2]. The study protocol was approved by the Italian National Institute of Research and Care of Aging Institutional Review, and Medstar Research Institute (Baltimore, MD).</p> <p>1. Ferrucci, L., et al., Subsystems contributing to the decline in ability to walk: bridging the gap between epidemiology and geriatric practice in the InCHIANTI study. J Am Geriatr Soc, 2000. 48(12): p. 1618-25. PMID: 11129752</p> <p>2. Melzer, D., et al., A genome-wide association study identifies protein quantitative trait loci (pQTLs). PLoS Genet, 2008. 4(5): p. e1000072. PMID: 18464913</p> | <p>The InCHIANTI study baseline (1998-2000) was supported as a "targeted project" (ICS110.1/RF97.71) by the Italian Ministry of Health and in part by the U.S. National Institute on Aging (Contracts: 263 MD 9164 and 263 MD 821336).</p> |                                                 |
| SardiNIA    | <p>The SardiNIA study is a longitudinal study which recruited and phenotyped 6,148 individuals, males and females, aged 14–102 y, from a cluster of four towns in the Lanusei Valley [Pilia et al Plos Genetic</p>                                                                                                                                                                                                                                                                                                                                                                                                                                                                                                                                                                                                                                                                                                                                                                                                                                                                                                                                                                                                                                                                                                                                                                                                                         | <p>We thank the many individuals who generously participated in this study. We are also grateful for the important</p>                                                                                                                     |                                                 |

| Cohort Name | Cohort description, ethical approvals and references                                                                                                                                                                                                                                                                                                                                                                                                                                                                                                                                                                                                                                                                                                                                                                                                                                                                                                                                                                                                             | Acknowledgements<br>Financial support                                                                                                                                                                                                                                                                                                                                                                                            | Acknowledgements<br>Other                                                                                                                                                                                                                                                                                                                    |
|-------------|------------------------------------------------------------------------------------------------------------------------------------------------------------------------------------------------------------------------------------------------------------------------------------------------------------------------------------------------------------------------------------------------------------------------------------------------------------------------------------------------------------------------------------------------------------------------------------------------------------------------------------------------------------------------------------------------------------------------------------------------------------------------------------------------------------------------------------------------------------------------------------------------------------------------------------------------------------------------------------------------------------------------------------------------------------------|----------------------------------------------------------------------------------------------------------------------------------------------------------------------------------------------------------------------------------------------------------------------------------------------------------------------------------------------------------------------------------------------------------------------------------|----------------------------------------------------------------------------------------------------------------------------------------------------------------------------------------------------------------------------------------------------------------------------------------------------------------------------------------------|
|             | <p>2006], located in the central east coast of the Sardinia island, Italy. During physical examination of each individual, a blood sample was collected and divided into two aliquots. One aliquot was used for DNA extraction and the other to characterize several blood phenotypes. During the study, we genotyped, by common GWAS arrays (Affymetrix 10K, Affymetrix 500K and Affymetrix 6.0), 4,694 individuals selected from the whole sample to represent the largest available families, regardless of their phenotypic values. Genotyping protocol and quality checks for the genotyping arrays were described previously [Naitza et al Plos Genet 2012]. The quality controlled 731,209 autosomal markers were used to estimate genotypes for additional 1,594,772 polymorphic SNPs assessed in the CEU HapMap population (release 22) by genotype imputation. The SardiNIA study was approved by both the IRB at the National Institute on Ageing and the local Italian Ethical Committee "Azienda Unita' Sanitaria Locale (U.S.L.) N 4, Lanusei.</p> | <p>computing resources made available for imputation and analysis by the CRS4 HP Computing Cluster in Pula (Cagliari, Italy), and in particular to Lidia Leoni, Luca Carta e Michele Muggiri. This work was supported by the Intramural Research Program of the National Institute on Aging (NIA), National Institutes of Health (NIH). The SardiNIA ("Progenia") team was supported by Contract NO1-AG-1-2109 from the NIA.</p> |                                                                                                                                                                                                                                                                                                                                              |
| CoLAUS      | <p>The CoLauS study is a population-based cohort study in Lausanne, Switzerland and has been described previously [Firmann M, BMC Cardiovascular Disorders, 2008, PMID 18366642]. Briefly, the baseline study was conducted between 2003 and 2006, recruiting over 6,000 subjects. The following inclusion criteria were applied: a) voluntary participation in the examination, including blood sample, b) aged 35-75 years, and c) Caucasian origin defined as having both parents and grand-parents Caucasian (determined by birth place). A follow-up visit took place from 2009-2012, hence 5 years after the baseline study, (n=5,228, 78% follow-up) and similar measurements were repeated. The Institutional Review Board of the Centre Hospitalier Universitaire Vaudois (CHUV) in Lausanne and the Cantonal Ethics Committee (Commission Cantonale d'éthique de la recherche sur l'être humain) approved the study protocol for both the baseline and follow-up studies and signed informed consent was obtained from participants.</p>               | <p>The CoLauS study was supported by research grants from GlaxoSmithKline, the Faculty of Biology and Medicine of Lausanne, Switzerland, and the Swiss National Science Foundation (grant no: 33CSGO-122661, 33CS30-139468). ZK was supported by the Leenaards Foundation and the Swiss National Science Foundation (31003A-143914).</p>                                                                                         | <p>The authors thank Peter Vollenweider, Vincent Mooser and Dawn Waterworth, Co-PIs of the CoLauS study. Special thanks to Murielle Bochud, Yolande Barreau, Mathieu Firmann, Vladimir Mayor, Anne-Lise Bastian, Binasa Ramic, Martine Moranville, Martine Baumer, Marcy Sagette, Jeanne Ecoffey and Sylvie Mermoud for data collection.</p> |
| PREVEND     | <p>The PREVEND Study is a prospective, observational cohort study, focussed to assess the impact of elevated urinary albumin loss in non-diabetic subjects on future cardiovascular and renal disease. PREVEND is an acronym for Prevention of RENal and Vascular ENd-stage Disease. This study started with a population survey on the prevalence of micro-albuminuria and generation of a study cohort of the general population. The goal is to monitor this cohort for the long-term development of cardiac-, renal- and peripheral vascular end-stage disease. For that purpose the participants receive questionnaires on</p>                                                                                                                                                                                                                                                                                                                                                                                                                              | <p>This work was supported by the following grants: PREVEND genetics is supported by the Dutch Kidney Foundation (Grant E033), the National Institutes of Health (grant LM010098), The Netherlands Organization for Scientific Research (NWO-Groot 175.010.2007.006, NWO VENI grant 916.761.70, ZonMW 90.700.441), and</p>                                                                                                       |                                                                                                                                                                                                                                                                                                                                              |

| Cohort Name | Cohort description, ethical approvals and references                                                                                                                                                                                                                                                                                                                                                                                                                                                                                                                                                                                                                                                                                                                                                                                                                                                                                       | Acknowledgements<br>Financial support                                                                                                                                                                                                                             | Acknowledgements<br>Other                                                                                                                                                                                                                                                                                                                                                                                                                                                                                                                                 |
|-------------|--------------------------------------------------------------------------------------------------------------------------------------------------------------------------------------------------------------------------------------------------------------------------------------------------------------------------------------------------------------------------------------------------------------------------------------------------------------------------------------------------------------------------------------------------------------------------------------------------------------------------------------------------------------------------------------------------------------------------------------------------------------------------------------------------------------------------------------------------------------------------------------------------------------------------------------------|-------------------------------------------------------------------------------------------------------------------------------------------------------------------------------------------------------------------------------------------------------------------|-----------------------------------------------------------------------------------------------------------------------------------------------------------------------------------------------------------------------------------------------------------------------------------------------------------------------------------------------------------------------------------------------------------------------------------------------------------------------------------------------------------------------------------------------------------|
|             | <p>events and are seen every three/four years for a survey on cardiac-, renal- and peripheral vascular morbidity.</p> <p>'The PREVEND study was approved by the medical ethics committee of the University Medical Center Groningen and conducted in accordance with the guidelines of the Declaration of Helsinki. All participants gave written informed consent.</p> <p>Website: <a href="http://www.prevend.org/index.php">http://www.prevend.org/index.php</a></p>                                                                                                                                                                                                                                                                                                                                                                                                                                                                    | <p>the Dutch Inter University Cardiology Institute Netherlands. N. Verweij is supported by the Netherlands Heart Foundation (grant NHS2010B280).</p>                                                                                                              |                                                                                                                                                                                                                                                                                                                                                                                                                                                                                                                                                           |
| FENLAND     | <p>The Fenland study is a population based cohort in Eastern England (UK) designed to analyse gene-lifestyle interactions on intermediate quantitative traits related to obesity and type 2 diabetes risk. It combines detailed measurement of the lifestyle exposures with accurate metabolic and anthropometric phenotyping. More than 10,000 men and women born between 1950 and 1975 have been recruited since 2004 and is still ongoing. Exclusion criteria were people suffering from a psychotic illness, pregnant and lactating females, people unable to walk unaided, individuals with diagnosed diabetes or a prognosis of less than 1 year. GWAS data is currently available on 1,500 randomly selected participants. The study was approved by Cambridge Local Research Ethics Committee (NHS).</p> <p>De Lucia Rolfe E, Am J Clin Nutr, 2010, PMID 21248185</p>                                                              | <p>The Fenland Study is funded by the Medical Research Council (MC_UU_12015/1 and MC_UU_12015/8); the Support Funding programme; Camstrad; and the British Heart Foundation (PG/07/108/23369). Clara Podmore is funded by the Wellcome Trust (097451/Z/11/Z).</p> | <p>We are grateful to all the volunteers for their time and help, and to the General Practitioners and practice staff for assistance with recruitment. We thank the Fenland Study Investigators, Fenland Study Co-ordination team and the Epidemiology Field, Data and Laboratory teams. Biochemical assays were performed by the National Institute for Health Research, Cambridge Biomedical Research Centre, Core Biochemistry Assay Laboratory, and the Cambridge University Hospitals NHS Foundation Trust, Department of Clinical Biochemistry.</p> |
| INTERACT    | <p>The InterAct study is a case-cohort study of incident cases of type 2 diabetes (T2D) from eight of the ten countries involved in the European Prospective Investigation into Cancer and Nutrition (EPIC) cohorts [Langenberg C, Diabetologia 2011 PMID 21717116]. In brief, 12,403 verified incident cases of T2D occurred between 1991 and 2007 among the participants eligible for inclusion in InterAct, and a centre-stratified subcohort of 16,154 individuals was defined for comparative analysis. As part of EPIC, standardised information had been collected on participants, including information on lifestyles exposures, diet, physical activity, standard anthropometric data and biomarker measurements on stored blood samples. The study was approved by the Internal Review Board of the International Agency for Research on Cancer, in addition to the local ethics committees in the participating countries.</p> | <p>InterAct was funded by the EU Integrated Project LSHM-CT-2006-037197.</p>                                                                                                                                                                                      | <p>We thank all EPIC participants and staff for their contribution to the study.</p>                                                                                                                                                                                                                                                                                                                                                                                                                                                                      |

**Supplementary Table 2.** Cohort, phenotype and method information.

|                      |                           |     |                      |                                    | Cohort Statistics, Means ± SD |               |                   |               |                      |                 |              | Laboratory Methods                                                                                            |                                                                                                                                                                                                                                                                                                                              |                                                                                                                                                                                                                    |
|----------------------|---------------------------|-----|----------------------|------------------------------------|-------------------------------|---------------|-------------------|---------------|----------------------|-----------------|--------------|---------------------------------------------------------------------------------------------------------------|------------------------------------------------------------------------------------------------------------------------------------------------------------------------------------------------------------------------------------------------------------------------------------------------------------------------------|--------------------------------------------------------------------------------------------------------------------------------------------------------------------------------------------------------------------|
| Cohort               | Cohort Full Name          | Sex | N                    | References (for Cohort)            | Age (Years)                   | Iron (μmol/l) | Transferrin (g/l) | TIBC (μmol/l) | Saturation (Percent) | Ferritin (μg/l) | Log Ferritin | Method for serum iron                                                                                         | Method for serum transferrin (or total iron binding capacity)                                                                                                                                                                                                                                                                | Method for ferritin                                                                                                                                                                                                |
| Discovery Cohorts:   |                           |     |                      |                                    |                               |               |                   |               |                      |                 |              |                                                                                                               |                                                                                                                                                                                                                                                                                                                              |                                                                                                                                                                                                                    |
| Australia-Adult      | QIMR Berghofer Adult      | M   | 3432 (1868 families) | PMID 19820699; 21151130; 20802479. | 47.5 ± 12.3                   | 21.2 ± 6.4    | 2.7 ± 0.35        |               | 32.1 ± 10.5          | 257.3 ± 190.3   | 2.30 ± 0.34  | Colorimetric, Ferrozine, Roche 917 or Modular P analyser                                                      | Immunoturbidimetric, Roche 917 or Modular P analyser                                                                                                                                                                                                                                                                         | Latex particle immunoturbidimetry, Roche 917 or Modular P analyser                                                                                                                                                 |
|                      |                           | F   | 5716 (3204 families) |                                    | 46.0 ± 12.8                   | 18.5 ± 6.7    | 2.9 ± 0.47        |               | 26.7 ± 10.4          | 99.1 ± 108.6    | 1.82 ± 0.41  |                                                                                                               |                                                                                                                                                                                                                                                                                                                              |                                                                                                                                                                                                                    |
| Australia-Adolescent | QIMR Berghofer Adolescent | M   | 1230 (741 families)  | PMID 17539372; 22563384.           | 14.6 ± 2.0                    | 17.3 ± 5.5    | 2.9 ± 0.36        |               | 24.0 ± 8.22          | 60.3 ± 44.9     | 1.70 ± 0.23  | Colorimetric, Ferrozine, Roche 917 or Modular P analyser                                                      | Immunoturbidimetric, Roche 917 or Modular P analyser                                                                                                                                                                                                                                                                         | Latex particle immunoturbidimetry, Roche 917 or Modular P analyser                                                                                                                                                 |
|                      |                           | F   | 1314 (760 families)  |                                    | 14.9 ± 2.3                    | 16.3 ± 5.4    | 3.0 ± 0.38        |               | 22.3 ± 7.7           | 43.7 ± 30.4     | 1.56 ± 0.26  |                                                                                                               |                                                                                                                                                                                                                                                                                                                              |                                                                                                                                                                                                                    |
|                      |                           |     |                      |                                    |                               |               |                   |               |                      |                 |              |                                                                                                               |                                                                                                                                                                                                                                                                                                                              |                                                                                                                                                                                                                    |
| Estonia (original)   | Estonian Genome Project   | M   | 440                  | PMID: 24518929                     | 37.3 ± 15.4                   | 19.4 ± 7.7    | 2.7 ± 0.44        |               | 29.9 ± 12.5          | 143.6 ± 163.4   | 1.99 ± 0.39  | Colorimetric method                                                                                           | Electro-chemiluminescence immunoassay (ECLIA)                                                                                                                                                                                                                                                                                | Immunoturbidimetry                                                                                                                                                                                                 |
|                      |                           | F   | 453                  |                                    | 37.5 ± 15.7                   | 16.9 ± 7.4    | 2.9 ± 0.58        |               | 24.0 ± 11.7          | 50.1 ± 51.9     | 1.51 ± 0.44  |                                                                                                               |                                                                                                                                                                                                                                                                                                                              |                                                                                                                                                                                                                    |
|                      |                           |     |                      |                                    |                               |               |                   |               |                      |                 |              |                                                                                                               |                                                                                                                                                                                                                                                                                                                              |                                                                                                                                                                                                                    |
| Val Borbera          | Val Borbera Study         | M   | 733                  |                                    | 54.4 ± 18.4                   | 17.7 ± 6.3    | 2.4 ± 0.4         |               | 29.6 ± 11.4          | 109.4 ± 112.2   | 1.9 ± 0.4    | Standard methods                                                                                              | Standard methods                                                                                                                                                                                                                                                                                                             | Standard methods                                                                                                                                                                                                   |
|                      |                           | F   | 926                  |                                    | 54.8 ± 18.7                   | 16.4 ± 5.8    | 2.5 ± 0.5         |               | 26.9 ± 10.5          | 108.2 ± 112.1   | 1.8 ± 0.4    |                                                                                                               |                                                                                                                                                                                                                                                                                                                              |                                                                                                                                                                                                                    |
|                      |                           |     |                      |                                    |                               |               |                   |               |                      |                 |              |                                                                                                               |                                                                                                                                                                                                                                                                                                                              |                                                                                                                                                                                                                    |
| NBS                  | Nijmegen Biomedical Study | M   | 889                  |                                    | 66.3 ± 7.1                    | 18.3 ± 5.8    |                   | 58.1 ± 8.7    | 32.0 ± 11.0          | 209.9 ± 191.1   | 2.19 ± 0.36  | Colorimetric measurement using ascorbate/FerroZine reagents(Roche Diagnostics) on an Abbott Aeroset analyzer. | Unsaturated iron binding capacity was measured by adding a known quantity of Fe3+ to the serum samples, reducing it with ascorbate to Fe2+ and measuring it with FerroZine as described for total serum iron (Roche reagents on an Aeroset). TIBC was calculated by adding serum iron and unsaturated iron-binding capacity. | Serum ferritin concentration was determined by a chemiluminescent microparticle immunoassay on the Abbott Architect calibrated against the ferritin assay on the Immulite 2000 of Diagnostic Products Corporation. |
|                      |                           | F   | 902                  |                                    | 56.6 ± 10.8                   | 16.3 ± 5.5    |                   | 60.6 ± 9.7    | 27.5 ± 10.0          | 105.8 ± 89.1    | 1.87 ± 0.39  |                                                                                                               |                                                                                                                                                                                                                                                                                                                              |                                                                                                                                                                                                                    |
|                      |                           |     |                      |                                    |                               |               |                   |               |                      |                 |              |                                                                                                               |                                                                                                                                                                                                                                                                                                                              |                                                                                                                                                                                                                    |
| Cambridge            | UK Blood Services (UKBS)  | M   | 1198                 | PMID: 17554300                     | 45.1 ± 11.9                   | N/A           | N/A               |               | N/A                  | 34.7 ± 27.1     | 3.29 ± 0.73  | N/A                                                                                                           | N/A                                                                                                                                                                                                                                                                                                                          | Ferritin concentrations from plasma collected                                                                                                                                                                      |

|                       |                                                              |     |      |                          | Cohort Statistics, Means ± SD |               |                   |               |                      |                 |              | Laboratory Methods                                                                         |                                                                                                              |                                                                                                                                                   |
|-----------------------|--------------------------------------------------------------|-----|------|--------------------------|-------------------------------|---------------|-------------------|---------------|----------------------|-----------------|--------------|--------------------------------------------------------------------------------------------|--------------------------------------------------------------------------------------------------------------|---------------------------------------------------------------------------------------------------------------------------------------------------|
| Cohort                | Cohort Full Name                                             | Sex | N    | References (for Cohort)  | Age (Years)                   | Iron (μmol/l) | Transferrin (g/l) | TIBC (μmol/l) | Saturation (Percent) | Ferritin (μg/l) | Log Ferritin | Method for serum iron                                                                      | Method for serum transferrin (or total iron binding capacity)                                                | Method for ferritin                                                                                                                               |
|                       | Common Controls panel                                        | F   | 1221 |                          | 42.1 ± 12.7                   | N/A           | N/A               |               | N/A                  | 19.4 ± 16.0     | 2.69 ± 0.76  |                                                                                            |                                                                                                              | from a blood donation pack (containing anitcoagulant) were measured by a two-site sandwich immunoassay using direct chemiluminometric technology. |
|                       |                                                              |     |      |                          |                               |               |                   |               |                      |                 |              |                                                                                            |                                                                                                              |                                                                                                                                                   |
| Micros/ EURAC         |                                                              | M   | 528  |                          | 45.5 ± 15.8                   | 20.3 ± 7.3    | 2.60 ± 0.34       |               | 31.8 ± 12.4          | 170.1 ± 143.0   | 2.08 ± 0.41  | Photometry                                                                                 | PEG-Enhanced Immunoturbidimetry                                                                              | Microparticle enzyme immunoassay (MEIA), AxSym, Abbott, USA                                                                                       |
|                       |                                                              | F   | 690  |                          | 46.0 ± 16.7                   | 18.0 ± 7.4    | 2.79 ± 0.48       |               | 26.4 ± 11.2          | 53.3 ± 54.2     | 1.53 ± 0.43  |                                                                                            |                                                                                                              |                                                                                                                                                   |
|                       |                                                              |     |      |                          |                               |               |                   |               |                      |                 |              |                                                                                            |                                                                                                              |                                                                                                                                                   |
| ERF/ Rotterdam        |                                                              | M   | 342  | PMID: 15054401; 16877869 | 54.6 ± 14.1                   | 21.3 ± 7.0    |                   |               | 36.1 ± 13.4          | 229.8 ± 186.0   | 5.16 ± 0.77  | Serum iron was measured by the Ferrozine method, using Roche/Hitachi 747 - 400 Kit(Roche). | Transferrin saturation (%) was calculated as serum iron levels divided by serum total iron binding capacity. | Serum ferritin levels were measured by a two-site chemiluminescent immunometric assay using the Immulite 2000 (Diagnostics Products Corporation). |
|                       |                                                              | F   | 529  |                          | 52.8 ± 15.1                   | 18.8 ± 6.5    |                   |               | 31.0 ± 11.9          | 105.7 ± 163.3   | 4.23 ± 0.92  |                                                                                            |                                                                                                              |                                                                                                                                                   |
|                       |                                                              |     |      |                          |                               |               |                   |               |                      |                 |              |                                                                                            |                                                                                                              |                                                                                                                                                   |
| KORA F3               | Kooperative Gesundheitsfor-<br>schung in der Region Augsburg | M   | 809  | PMID: 16032513; 16032514 | 63.0 ± 10.1                   | 17.5 ± 5.5    | 2.45 ± 0.33       |               | 28.9 ± 9.5           | 289.8 ± 245.6   | 2.33 ± 0.35  | Colorimetric assay, (Cobas®, Roche)                                                        | Immunonephelometry, (Behring Nephelometer®, Siemens)                                                         | Electrochemiluminescence immunoassay (ECLIA) Cobas, Roche                                                                                         |
|                       |                                                              | F   | 825  |                          | 62.1 ± 10.1                   | 16.1 ± 5.2    | 2.57 ± 0.36       |               | 25.4 ± 8.7           | 141.0 ± 120.4   | 2.00 ± 0.39  |                                                                                            |                                                                                                              |                                                                                                                                                   |
| KORA F4               | Kooperative Gesundheitsfor-<br>schung in der Region Augsburg | M   | 882  | PMID: 16032513; 16032514 | 61.2 ± 8.9                    | 22.2 ± 6.9    | 2.52 ± 0.36       |               | 35.7 ± 12.4          | 282.7 ± 255.9   | 2.31 ± 0.37  | Colorimetric assay, (Cobas®, Roche)                                                        | Immunonephelometry, (Behring Nephelometer®, Siemens)                                                         | Electrochemiluminescence immunoassay (ECLIA) Cobas, Roche                                                                                         |
|                       |                                                              | F   | 927  |                          | 60.6 ± 8.8                    | 20.2 ± 6.5    | 2.55 ± 0.35       |               | 32.2 ± 11.1          | 133.5 ± 132.6   | 1.97 ± 0.40  |                                                                                            |                                                                                                              |                                                                                                                                                   |
|                       |                                                              |     |      |                          |                               |               |                   |               |                      |                 |              |                                                                                            |                                                                                                              |                                                                                                                                                   |
| BHS                   | Busselton Health Study                                       | M   | 397  |                          | 54.0 ± 15.4                   | 18.6 ± 5.7    | 2.59 ± 0.21       |               | 29.5 ± 10.0          | 234.6 ± 397.0   | 2.20 ± 0.37  | Colorimetric                                                                               | Immunoturbidimetric                                                                                          | Electrochemiluminescence                                                                                                                          |
|                       |                                                              | F   | 480  |                          | 55.5 ± 14.9                   | 17.1 ± 5.8    | 2.69 ± 0.50       |               | 26.6 ± 11.4          | 98.6 ± 95.7     | 1.81 ±0.43   |                                                                                            |                                                                                                              |                                                                                                                                                   |
|                       |                                                              |     |      |                          |                               |               |                   |               |                      |                 |              |                                                                                            |                                                                                                              |                                                                                                                                                   |
| Replication Cohorts:  |                                                              |     |      |                          |                               |               |                   |               |                      |                 |              |                                                                                            |                                                                                                              |                                                                                                                                                   |
| Estonia (replication) | Estonian Genome                                              | M   | 547  | PMID: 24518929           | 54.4 ± 16.1                   | 19.0 ± 6.6    | 2.7 ± 0.40        |               | 31.9 ± 11.5          | 181.9 ± 189.4   | 2.11 ± 0.37  | Colorimetric method                                                                        | Electro-chemiluminescence immunoassay                                                                        | Immunoturbidimetry                                                                                                                                |

|                      |                                                   |     |      |                         | Cohort Statistics, Means ± SD |               |                   |               |                      |                 |              | Laboratory Methods                                                                                |                                                                                                          |                                                                                                                                                       |
|----------------------|---------------------------------------------------|-----|------|-------------------------|-------------------------------|---------------|-------------------|---------------|----------------------|-----------------|--------------|---------------------------------------------------------------------------------------------------|----------------------------------------------------------------------------------------------------------|-------------------------------------------------------------------------------------------------------------------------------------------------------|
| Cohort               | Cohort Full Name                                  | Sex | N    | References (for Cohort) | Age (Years)                   | Iron (μmol/l) | Transferrin (g/l) | TIBC (μmol/l) | Saturation (Percent) | Ferritin (μg/l) | Log Ferritin | Method for serum iron                                                                             | Method for serum transferrin (or total iron binding capacity)                                            | Method for ferritin                                                                                                                                   |
|                      | Project                                           | F   | 470  |                         | 53.4 ± 15.9                   | 17.3 ± 6.5    | 2.8 ± 0.51        |               | 29.0 ± 12.7          | 88.9 ± 96.2     | 1.74 ± 0.45  |                                                                                                   |                                                                                                          |                                                                                                                                                       |
|                      |                                                   |     |      |                         |                               |               |                   |               |                      |                 |              |                                                                                                   |                                                                                                          |                                                                                                                                                       |
| InCHIANTI            | InCHIANTI study                                   | M   | 536  | PMID: 19880490          | 67.1 ± 15.3                   | 15.4 ± 5.0    | 1.23 ± 0.5        |               |                      | 185.2 ± 180     | 4.28 ± 1.0   | Colorimetric assay (Roche Diagnostics, Mannheim, Germany)                                         | Chemiluminescent immunoassay (Abbott Diagnostics and Nichols Institute Diagnostics).                     | Chemiluminescent immunoassay (Abbot Diagnostics).                                                                                                     |
|                      |                                                   | F   | 670  |                         | 69.1 ± 15.6                   | 14.5 ± 4.4    | 1.25 ± 0.43       |               |                      | 105.1 ± 94.5    | 4.26 ± 0.95  |                                                                                                   |                                                                                                          |                                                                                                                                                       |
|                      |                                                   |     |      |                         |                               |               |                   |               |                      |                 |              |                                                                                                   |                                                                                                          |                                                                                                                                                       |
| SardinIA             | SardinIA study on aging                           | M   | 2051 | PMID: 16934002          | 43.7 ± 18.1                   | 17.3 ± 6.4    | 2.96 ± 0.57       |               |                      |                 |              | Express 560 Plus chemistry analyzer (Bayer)                                                       | Express 560 Plus chemistry analyzer (Bayer)                                                              | -                                                                                                                                                     |
|                      |                                                   | F   | 2643 |                         | 43.1 ± 17.3                   | 14.8 ± 6.0    | 3.15 ± 0.65       |               |                      |                 |              |                                                                                                   |                                                                                                          |                                                                                                                                                       |
|                      |                                                   |     |      |                         |                               |               |                   |               |                      |                 |              |                                                                                                   |                                                                                                          |                                                                                                                                                       |
| CoLAUS               | Cohorte Lausanne                                  | M   | 2550 | PMID: 18366642          | 52.9 ± 10.8                   | 18.3 ± 6.1    | 2.33 ± 0.33       |               | 35.69 ± 12.35        | 256.9 ± 219.2   | 2.28 ± 0.35  | Timed-endpoint method (SYNCHRON® System)                                                          | Turbidimetric method (SYNCHRON® system, Beckman Coulter)                                                 | Immunoturbidimetric method (Ferritin Tina-quant fourth generation, Roche Diagnostics, measured on Modular P).                                         |
|                      |                                                   | F   | 2869 |                         | 52.9 ± 10.8                   | 18.3 ± 6.1    | 2.33 ± 0.33       |               | 35.69 ± 12.35        | 256.9 ± 219.2   | 2.28 ± 0.35  |                                                                                                   |                                                                                                          |                                                                                                                                                       |
|                      |                                                   |     |      |                         |                               |               |                   |               |                      |                 |              |                                                                                                   |                                                                                                          |                                                                                                                                                       |
| PREVEND              | Prevention of Renal and Vascular Endstage Disease | M   | 1875 |                         | 50.9 ± 12.8                   | 16.5 ± 5.5    | 2.54 ± 0.37       |               | 26.30 ± 8.99         | 180.2 ± 166.1   | 2.12 ± 0.35  | Colorimetric assay, Roche Modular P                                                               | Immunoturbidimetric assay,Roche Modular P                                                                | Sandwich immunoassay, Roche Modular E                                                                                                                 |
|                      |                                                   | F   | 1769 |                         | 48.2 ± 12.0                   | 15.0 ± 5.6    | 2.64 ± 0.43       |               | 23.30 ± 9.51         | 87.0 ± 96.9     | 1.75 ± 0.43  |                                                                                                   |                                                                                                          |                                                                                                                                                       |
|                      |                                                   |     |      |                         |                               |               |                   |               |                      |                 |              |                                                                                                   |                                                                                                          |                                                                                                                                                       |
| FENLAND              | Fenland Study                                     | M   | 615  | PMID: 21248185          | 44.5 ± 7.4                    | 20.0 ± 6.4    | 2.53 ± 0.37       |               | 34.78 ± 12.03        | n/a             | n/a          | Colorimetric assay (Siemens Healthcare Diagnostics®) on a Siemens Dimension® RxL analyser.        | Immunoturbidimetric assay (Siemens Healthcare Diagnostics®) on a Siemens Dimension® RxL analyser.        |                                                                                                                                                       |
|                      |                                                   | F   | 787  |                         | 45.4 ± 7.2                    | 17.6 ± 6.8    | 2.65 ± 0.45       |               | 29.48 ± 12.68        | n/a             | n/a          |                                                                                                   |                                                                                                          |                                                                                                                                                       |
|                      |                                                   |     |      |                         |                               |               |                   |               |                      |                 |              |                                                                                                   |                                                                                                          |                                                                                                                                                       |
| INTERACT (cases)     | InterAct (cases)                                  | M   | 2087 | PMID: 21717116          | 54.7 ± 8.0                    | 18.5 ± 6.2    | 2.76 ± 0.40       |               | 27.37 ± 10.03        | 249.6 ± 219.7   | 2.24 ± 0.39  | Colorimetric assay (Roche Diagnostics, Mannheim, Germany), on a Roche Hitachi Modular P analyser. | Immunoturbidimetric assay (Roche Diagnostics, Mannheim, Germany), on a Roche Hitachi Modular P analyser. | Electrochemiluminescence immunoassay (ECLIA) with a sandwich principle (Roche Diagnostics, Mannheim, Germany), on a Roche Hitachi Modular E analyser. |
|                      |                                                   | F   | 2251 |                         | 55.6 ± 8.3                    | 16.1 ± 5.6    | 2.89 ± 0.45       |               | 22.91 ± 8.68         | 124.0 ± 121.6   | 1.89 ± 0.46  |                                                                                                   |                                                                                                          |                                                                                                                                                       |
| INTERACT (subcohort) | InterAct (sub-cohort)                             | M   | 1816 |                         | 52.2 ± 9.2                    | 18.3 ± 6.0    | 2.72 ± 0.38       |               | 27.32 ± 9.38         | 186.1 ± 171.7   | 2.12 ± 0.39  |                                                                                                   |                                                                                                          |                                                                                                                                                       |
|                      |                                                   | F   | 3140 |                         | 51.7 ± 9.6                    | 16.5 ± 5.9    | 2.82 ± 0.44       |               | 23.91 ± 9.34         | 80.4 ± 90.1     | 1.71 ± 0.43  |                                                                                                   |                                                                                                          |                                                                                                                                                       |

**Supplementary Table 3.** Genotyping, imputation and quality control procedures

| Cohort                | Sample QCs                                                  | Genotyping                                                                                |                                                |                 | Imputation     |                                            |              |                   |                                                            | Statistical Analysis                                                        | Covariates                                     |
|-----------------------|-------------------------------------------------------------|-------------------------------------------------------------------------------------------|------------------------------------------------|-----------------|----------------|--------------------------------------------|--------------|-------------------|------------------------------------------------------------|-----------------------------------------------------------------------------|------------------------------------------------|
|                       |                                                             | Platforms                                                                                 | Exclusion Criteria                             | N Clean SNPs    | N imputed SNPs | Exclusion Criteria                         | N Clean SNPs | Imputation Method | Reference panel                                            |                                                                             |                                                |
| Australia- Adult      | ethnic outliers; duplicates; Mendelian error; Sex mismatch; | HumanCNV370-Quadv3;HumanCNV370-Quadv3;Human610-Quad;Human317K;Human610-Quad;Human610-Quad | MAF<1%; Call Rate<99; P HWE<10-6; genecall<0.7 | 312,937-531,042 | 2543887        | MAF<1%; Call Rate<99; P HWE<10-6; Rsq<0.30 | 2377358      | Mach              | HAPMAP II CEU Panel (Release 22, NCBI Build36, dbSNP b126) | Merlin                                                                      | Age, 5 PCs                                     |
| Australia- Adolescent | ethnic outliers; duplicates; Mendelian error; Sex mismatch; | HumanCNV370-Quadv3;HumanCNV370-Quadv3;Human610-Quad;Human317K;Human610-Quad;Human610-Quad | MAF<1%; Call Rate<99; P HWE<10-6; genecall<0.7 | 312,937-531,042 | 2543887        | MAF<1%; Call Rate<99; P HWE<10-6; Rsq<0.3  | 2374850      | Mach              | HAPMAP II CEU Panel (Release 22, NCBI Build36, dbSNP b126) | Merlin                                                                      | Age, 5 PCs                                     |
| Estonia (original)    | ethnic outliers; duplicates; Sex mismatch;                  | Illumina HumanCNV370                                                                      | MAF<1%; Call Rate<95%; P HWE<10-6              | 320,955         | 2548513        | MAF<1%; Call Rate<99; P HWE<10-6; Rsq<0.30 | 2198922      | IMPUTE v0.5       | HapMap II , CEU, Build 36                                  | SNPTEST (v2.1)                                                              | Age, sex, 5 PCs                                |
| KORA F3               | call rate 93%                                               | Affymetrix 500K                                                                           | call rate < 95%, pHWE < 5x10-6, maf < 0.01     | 379,392         | 2549999        | MAF<1%; Call Rate<99; P HWE<10-6; Rsq<0.30 | 2471287      | Impute v1.0.0     | Hap Map 2                                                  | SNPTEST v2.1.1, method expected                                             | age, (separate analysis for males and females) |
| KORA F4               | call rate 93%                                               | Affymetrix 6.0                                                                            | call rate 93%, hapmap snps only                | 651,596         | 2543887        | MAF<1%; Call Rate<99; P HWE<10-6; Rsq<0.30 | 2424291      | MACH v1.0.15      | Hap Map 2                                                  | mach2QTL                                                                    | age, (separate analysis for males and females) |
| Val Borbera           | Mendelian error; Sex mismatch                               | Illumina 370 Quad-CNV array, v3                                                           | MAF<1%; Call Rate<90; P HWE<10-4               | 332,887         | 2471497        | MAF<1%; Call Rate<90; P HWE<10-4; Rsq<0.3  | 2423712      | MACH              | HapMap release 22 build 36                                 | R, GenABEL, ProbABEL (mmscore function was used to account for relatedness) | Age, 5 PCs                                     |
| NBS/Nijmegen          |                                                             | Illumina HumanHap370CNV-Duo BeadChip                                                      |                                                |                 | 2542995        | MAF<1%; Call Rate<99; P HWE<10-6; Rsq<0.30 | 2366475      | IMPUTE v0.5       | CEU HapMap Phase II (version 22, build 36)                 | SNPTEST (v2.1)                                                              |                                                |

|                       |                                                                                                    |                                                  |                                                                                                                                                                                  |         |         |                                            |         |                     |                            |                                                                                      |                                       |
|-----------------------|----------------------------------------------------------------------------------------------------|--------------------------------------------------|----------------------------------------------------------------------------------------------------------------------------------------------------------------------------------|---------|---------|--------------------------------------------|---------|---------------------|----------------------------|--------------------------------------------------------------------------------------|---------------------------------------|
| Cambridge             | call rate 90%                                                                                      | Affymetrix v6.0 and Illumina 1.2M SNP arrays     | MAF<1%; Call Rate<90; P HWE<10-6                                                                                                                                                 | 2492005 | 2622175 | MAF<1%; Call Rate<99; P HWE<10-6; Rsq<0.30 | 2497685 | IMPUTE v2           | NCBI build 36              | SNPTEST                                                                              |                                       |
| Micros/EURAC          |                                                                                                    | Illumina 300k (HumHap300v2)                      |                                                                                                                                                                                  |         | 2543887 | MAF<1%; Call Rate<99; P HWE<10-6; Rsq<0.30 | 2377883 | MACH version 1.0.16 | HapMap II , CEU, Build 36  | regression using linear mixed models based on genomic kinship with ProbABEL v. 0.0-6 |                                       |
| ERF/Rotterdam         | Mendelian error; Sex mismatch                                                                      | Illumina 318K, Illumina 370K and Affymetrix 250K | MAF<1%; Call Rate<98; P HWE<10-6                                                                                                                                                 | 450,877 | 2543887 | MAF<1%; Call Rate<99; P HWE<10-6; Rsq<0.30 | 2395264 | MACH                | HapMap II , CEU, Build 36  | regression using linear mixed models based on genomic kinship with ProbABEL v. 0.0-6 | age                                   |
| BHS-WA                |                                                                                                    |                                                  |                                                                                                                                                                                  |         | 2543887 | MAF<1%; Call Rate<99; P HWE<10-6; Rsq<0.30 | 2416309 | MACH                | HapMap r22 b36             | ProbABEL                                                                             |                                       |
| Estonia (replication) | ethnic outliers; duplicates; Sex mismatch;                                                         | Illumina OmniExpress                             | MAF<1%; Call Rate<95%; P HWE<10-6                                                                                                                                                | 647,357 | 2543887 | none                                       | 2543887 | IMPUTE2             | HapMap II , CEU, Build 36  | SNPTEST (v2.1)                                                                       | Age, sex, 5 PCs                       |
| InCHIANTI             | call rate < 97%, sex mismatch, heterozygosity > 0.3, missing data                                  | Illumina 550K                                    | MAF<1% call rate<99, HWE<10-6                                                                                                                                                    | 498,838 | 2557230 | None                                       | 2557230 | MACH                | HapMap release 22 build 36 | Merlin-offline                                                                       | age, sex, center                      |
| SardinIA              | call rate >95%                                                                                     | Affymetrix 10K, 500K, 6.0                        | MAF>5% (10K, 500K) or >1% (6.0); HWE <10-6 ; call rate >90% (10K,. 500K) or >95% (6.0); >2% Mendelian Inheritance Errors; >2% discrepancies for SNPs present in different arrays | 731209  | 2561960 | rsqr<0.3, MAF <1%, Excess Mendelian Errors | 2353985 | MACH                | HapMap r22 b36             | Merlin (--fastassoc)                                                                 | age, age-squared, sex                 |
| CoLAUS                | 1) ethnic outliers;<br>2) related individuals and duplicates;<br>3) Missing body weight and height | Affymetrix GeneChip Human Mapping 500k           | MAF<1%; call rate <70%; HWE <10-7                                                                                                                                                | 390,631 | 2557249 | None                                       | 2557249 | IMPUTE              | HapMap r21 b35             | Matlab                                                                               | age, sex and the first 5 ancestry PCs |

[illegible]

**Supplementary Table 4.** Initial meta-analysis; lead SNP at loci showing suggestive results ( $p < 5 \times 10^{-6}$ ) from meta-analysis of the Discovery datasets. Statistical tests and numbers of subjects are as described in the paper.

| CHR                | SNP        | BP(B37)     | BP (B36)    | A1 | A2 | Freq1 | Effect | StdErr | P.value  | Nearby gene(s)         |
|--------------------|------------|-------------|-------------|----|----|-------|--------|--------|----------|------------------------|
| <b>Iron</b>        |            |             |             |    |    |       |        |        |          |                        |
| 2                  | rs12693541 | 190,418,690 | 190,126,935 | t  | c  | 0.871 | -0.106 | 0.014  | 4.18E-14 | <i>SLC40A1</i>         |
| 2                  | rs6726348  | 239,084,119 | 238,748,858 | t  | c  | 0.444 | 0.047  | 0.010  | 3.12E-06 | <i>ILKAP</i>           |
| 3                  | rs7638018  | 133,495,461 | 134,978,151 | a  | g  | 0.667 | -0.074 | 0.010  | 1.87E-12 | <i>TF</i>              |
| 5                  | rs17236666 | 50,940,708  | 50,976,465  | t  | c  | 0.950 | 0.100  | 0.022  | 4.39E-06 | <i>ISL1</i>            |
| 5                  | rs173780   | 60,903,201  | 60,938,958  | a  | g  | 0.135 | -0.068 | 0.015  | 3.35E-06 | <i>FLJ37543</i>        |
| 6                  | rs1800562  | 26,093,141  | 26,201,120  | a  | g  | 0.067 | 0.372  | 0.020  | 3.96E-77 | <i>HFE</i>             |
| 6                  | rs4715597  | 56,103,037  | 56,210,996  | c  | g  | 0.294 | 0.056  | 0.011  | 4.66E-07 | <i>COL21A1</i>         |
| 6                  | rs6920211  | 135,431,318 | 135,473,011 | t  | c  | 0.758 | -0.054 | 0.012  | 3.14E-06 | <i>HBS1L, MYB</i>      |
| 7                  | rs2075672  | 100,240,296 | 100,078,232 | a  | g  | 0.379 | -0.056 | 0.010  | 5.95E-08 | <i>TFR2</i>            |
| 8                  | rs604302   | 37,004,569  | 37,123,727  | t  | c  | 0.200 | 0.058  | 0.012  | 3.07E-06 | <i>FKSG2</i>           |
| 9                  | rs1752162  | 126,551,037 | 125,590,858 | t  | c  | 0.146 | 0.061  | 0.013  | 4.80E-06 | <i>DENND1A</i>         |
| 12                 | rs1050045  | 58,115,271  | 56,401,538  | t  | c  | 0.559 | 0.043  | 0.009  | 4.12E-06 | <i>OS9</i>             |
| 15                 | rs16976620 | 45,249,892  | 43,037,184  | a  | g  | 0.098 | -0.081 | 0.016  | 4.52E-07 | <i>C15orf43</i>        |
| 15                 | rs7172337  | 61,767,743  | 59,555,035  | t  | c  | 0.728 | -0.052 | 0.011  | 2.63E-06 | <i>RORA</i>            |
| 17                 | rs7209063  | 1,892,031   | 1,838,781   | c  | g  | 0.487 | 0.048  | 0.010  | 3.61E-06 | <i>RTN4RL1</i>         |
| 17                 | rs2007993  | 56,590,643  | 53,945,642  | t  | c  | 0.785 | 0.057  | 0.011  | 4.18E-07 | <i>MTMR4</i>           |
| 20                 | rs6067410  | 48,973,912  | 48,407,319  | a  | t  | 0.456 | -0.047 | 0.010  | 3.93E-06 | <i>LOC284751</i>       |
| 22                 | rs855791   | 37,462,936  | 35,792,882  | a  | g  | 0.446 | -0.187 | 0.010  | 4.31E-77 | <i>TMPRSS6</i>         |
| <b>Transferrin</b> |            |             |             |    |    |       |        |        |          |                        |
| 1                  | rs946526   | 46,487,168  | 46,259,755  | t  | c  | 0.042 | -0.122 | 0.026  | 2.98E-06 | <i>MAST2</i>           |
| 2                  | rs11680788 | 33,059,096  | 32,912,600  | t  | c  | 0.046 | -0.115 | 0.025  | 4.57E-06 | <i>TTC27</i>           |
| 2                  | rs744653   | 190,378,750 | 190,086,995 | t  | c  | 0.854 | 0.092  | 0.014  | 2.00E-10 | <i>WDR75, SLC40A1</i>  |
| 3                  | rs8177240  | 133,477,701 | 134,960,391 | t  | g  | 0.671 | -0.423 | 0.011  | < E-340  | <i>TF</i>              |
| 3                  | rs9990333  | 195,827,205 | 197,311,602 | t  | c  | 0.460 | -0.067 | 0.010  | 3.01E-11 | <i>TFRC</i>            |
| 4                  | rs1865383  | 73,110,424  | 73,329,288  | t  | g  | 0.316 | -0.052 | 0.011  | 2.17E-06 | <i>NPFFR2, ADAMTS3</i> |
| 5                  | rs10055024 | 11,149,808  | 11,202,808  | t  | c  | 0.386 | 0.051  | 0.010  | 8.98E-07 | <i>CTNND2</i>          |

| CHR               | SNP        | BP(B37)     | BP (B36)    | A1 | A2 | Freq1 | Effect | StdErr | P.value   | Nearby gene(s)           |
|-------------------|------------|-------------|-------------|----|----|-------|--------|--------|-----------|--------------------------|
| 6                 | rs1800562  | 26,093,141  | 26,201,120  | a  | g  | 0.066 | -0.550 | 0.021  | 1.26E-153 | <i>HFE</i>               |
| 7                 | rs4291160  | 11,974,451  | 11,940,976  | t  | g  | 0.754 | -0.055 | 0.012  | 3.68E-06  | <i>TMEM106B</i>          |
| 8                 | rs1495741  | 18,272,881  | 18,317,161  | a  | g  | 0.782 | 0.083  | 0.012  | 1.57E-11  | <i>NAT2</i>              |
| 8                 | rs1354342  | 107,200,980 | 107,270,156 | a  | g  | 0.051 | 0.126  | 0.024  | 1.28E-07  | <i>ZFPM2, OXR1</i>       |
| 9                 | rs2165554  | 119,479,774 | 118,519,595 | t  | c  | 0.392 | -0.048 | 0.011  | 4.19E-06  | <i>ASTN2</i>             |
| 11                | rs6486121  | 13,355,770  | 13,312,346  | t  | c  | 0.627 | -0.056 | 0.011  | 1.04E-07  | <i>ARNTL</i>             |
| 11                | rs174577   | 61,604,814  | 61,361,390  | a  | c  | 0.333 | 0.068  | 0.011  | 1.90E-10  | <i>FADS2</i>             |
| 12                | rs12371237 | 29,831,076  | 29,722,343  | a  | c  | 0.336 | -0.050 | 0.011  | 3.48E-06  | <i>TMTC1</i>             |
| 12                | rs2374503  | 106,034,829 | 104,558,959 | c  | g  | 0.421 | -0.048 | 0.010  | 2.95E-06  | <i>LOC387882</i>         |
| 19                | rs12978009 | 17,113,634  | 16,974,634  | a  | g  | 0.179 | -0.064 | 0.014  | 3.17E-06  | <i>CPAMD8</i>            |
| 22                | rs2275901  | 19,135,603  | 17,515,603  | a  | g  | 0.239 | 0.060  | 0.013  | 1.77E-06  | <i>GSCL</i>              |
| <b>Saturation</b> |            |             |             |    |    |       |        |        |           |                          |
| 3                 | rs8177272  | 133,482,870 | 134,965,560 | a  | g  | 0.331 | -0.097 | 0.011  | 5.52E-20  | <i>TF</i>                |
| 3                 | rs2061336  | 164,591,618 | 166,074,312 | a  | g  | 0.913 | -0.093 | 0.018  | 1.99E-07  | <i>SI</i>                |
| 3                 | rs9990333  | 195,827,205 | 197,311,602 | t  | c  | 0.460 | 0.049  | 0.010  | 7.37E-07  | <i>TFRC</i>              |
| 6                 | rs1800562  | 26,093,141  | 26,201,120  | a  | g  | 0.067 | 0.577  | 0.020  | 1.52E-178 | <i>HFE</i>               |
| 6                 | rs2841000  | 56,077,917  | 56,185,876  | t  | c  | 0.701 | -0.051 | 0.011  | 2.78E-06  | <i>COL21A1</i>           |
| 6                 | rs9389269  | 135,427,159 | 135,468,852 | t  | c  | 0.727 | -0.055 | 0.011  | 9.78E-07  | <i>HBS1L, MYB</i>        |
| 7                 | rs11765024 | 100,125,975 | 99,963,911  | a  | g  | 0.897 | -0.091 | 0.017  | 3.32E-08  | <i>AGFG2 (TFR2, EPO)</i> |
| 7                 | rs221834   | 100,343,175 | 100,181,111 | c  | g  | 0.928 | -0.123 | 0.021  | 2.38E-09  | <i>ZAN (TFR2, EPO)</i>   |
| 8                 | rs604302   | 37,004,569  | 37,123,727  | t  | c  | 0.200 | 0.058  | 0.012  | 3.26E-06  | <i>FKSG2</i>             |
| 12                | rs11046313 | 22,274,788  | 22,166,055  | a  | c  | 0.286 | -0.056 | 0.011  | 6.86E-07  | <i>CMAS, ST8SIA1</i>     |
| 17                | rs4790859  | 1,897,820   | 1,844,570   | a  | g  | 0.474 | 0.048  | 0.010  | 2.29E-06  | <i>RTN4RL1</i>           |
| 22                | rs855791   | 37,462,936  | 35,792,882  | a  | g  | 0.446 | -0.192 | 0.010  | 3.50E-80  | <i>TMPRSS6</i>           |
| <b>Ferritin</b>   |            |             |             |    |    |       |        |        |           |                          |
| 2                 | rs7603193  | 60,478,727  | 60,332,231  | t  | c  | 0.033 | -0.129 | 0.027  | 1.38E-06  | <i>BCL11A</i>            |
| 2                 | rs12693541 | 190,418,690 | 190,126,935 | t  | c  | 0.871 | -0.106 | 0.014  | 4.18E-14  | <i>SLC40A1</i>           |
| 3                 | rs4376025  | 3,419,984   | 3,394,984   | t  | c  | 0.680 | 0.046  | 0.010  | 3.62E-06  | <i>CRBN, LRRN1</i>       |
| 5                 | rs17236666 | 50,940,708  | 50,976,465  | t  | c  | 0.950 | 0.100  | 0.022  | 4.39E-06  | <i>ISL1</i>              |
| 5                 | rs173780   | 60,903,201  | 60,938,958  | a  | g  | 0.135 | -0.068 | 0.015  | 3.35E-06  | <i>FLJ37543</i>          |
| 6                 | rs1800562  | 26,093,141  | 26,201,120  | a  | g  | 0.068 | 0.211  | 0.019  | 1.43E-29  | <i>HFE</i>               |
| 6                 | rs9322487  | 155,255,431 | 155,297,123 | a  | g  | 0.080 | 0.085  | 0.018  | 3.47E-06  | <i>RBM16, TIAM2</i>      |
| 9                 | rs1752162  | 126,551,037 | 125,590,858 | t  | c  | 0.146 | 0.061  | 0.013  | 4.80E-06  | <i>DENND1A</i>           |

| CHR | SNP        | BP(B37)     | BP (B36)    | A1 | A2 | Freq1 | Effect | StdErr | P.value  | Nearby gene(s)         |
|-----|------------|-------------|-------------|----|----|-------|--------|--------|----------|------------------------|
| 9   | rs651007   | 136,153,875 | 135,143,696 | t  | c  | 0.203 | -0.060 | 0.012  | 2.54E-07 | <i>ABO</i>             |
| 11  | rs7395347  | 9,152,463   | 9,109,039   | t  | c  | 0.341 | 0.045  | 0.010  | 3.20E-06 | <i>SCUBE2, RAB6IP1</i> |
| 12  | rs1050045  | 58,115,271  | 56,401,538  | t  | c  | 0.559 | 0.043  | 0.009  | 4.12E-06 | <i>OS9</i>             |
| 15  | rs16976620 | 45,249,892  | 43,037,184  | a  | g  | 0.098 | -0.081 | 0.016  | 4.52E-07 | <i>C15orf43</i>        |
| 17  | rs368243   | 56,708,979  | 54,063,978  | t  | c  | 0.440 | 0.051  | 0.009  | 3.80E-08 | <i>TEX14</i>           |
| 22  | rs2413450  | 37,470,224  | 35,800,170  | t  | c  | 0.463 | -0.056 | 0.010  | 3.57E-09 | <i>TMPRSS6</i>         |

**Supplementary Table 5.** List of additional genes significantly associated with iron status ( $p < 3.0 \times 10^{-6}$ , based on ~17,000 genes), from the gene-based analyses of the discovery dataset, performed using VEGAS statistical package, <http://gump.gimr.edu.au/VEGAS/>.

| Phenotype  | Chr | Gene                 | N of SNPs | Region Start | Region Stop | Test statistic | Gene-based P-value | Best SNP   | Top SNP P-value       |
|------------|-----|----------------------|-----------|--------------|-------------|----------------|--------------------|------------|-----------------------|
| Iron       | 6   | <i>FKSG83</i>        | 103       | 27,400,556   | 27,401,720  | 834.0128       | 3.00E-06           | rs2235233  | 5.51E-06              |
| Iron       | 7   | <i>TFR2</i>          | 26        | 100,055,974  | 100,077,109 | 329.942        | 1.00E-06           | rs2075672  | 5.95E-08              |
| Saturation | 7   | <i>TFR2</i>          | 26        | 100,055,974  | 100,077,109 | 326.6695       | 1.00E-06           | rs11761260 | 6.45E-08              |
| Saturation | 7   | <i>EPO</i>           | 32        | 100,156,358  | 100,159,259 | 411.2104       | 1.00E-06           | rs221834   | 2.38E-09 <sup>1</sup> |
| Ferritin   | 15  | <i>C15orf43-SORD</i> | 27        | 43,036,194   | 43,058,713  | 621.26896      | 1.00E-06           | rs16976620 | 4.52E-07              |

<sup>1</sup> The VEGAS output associated this SNP with the EPO region, but rs221834 is within ZAN and the regional plot (Supplementary Figure 3) shows allelic associations across a region  $\approx$  200 kb which includes *TFR2* and *EPO*.

**Supplementary Table 6.** Effects of omitting subjects with low ferritin on allelic effects on serum iron, transferrin, transferrin saturation and ferritin. The lead SNPs at loci which were significant ( $p < 5 \times 10^{-8}$ ) or suggestive ( $p$  between  $5 \times 10^{-8}$  and  $5 \times 10^{-6}$ ) for one or more phenotypes in the initial analysis of the entire Discovery dataset are listed, and effects and p-values are omitted for each phenotype where results were neither significant nor suggestive.

| Marker Information |     |              |    |    | Iron                                        |        |        |          |                                            |        |        |          |
|--------------------|-----|--------------|----|----|---------------------------------------------|--------|--------|----------|--------------------------------------------|--------|--------|----------|
| SNP                | CHR | BP (build36) | A1 | A2 | Before excluding subjects with low ferritin |        |        |          | After excluding subjects with low ferritin |        |        |          |
|                    |     |              |    |    | Freq                                        | Effect | StdErr | P.value  | Freq                                       | Effect | StdErr | P.value  |
| rs946526           | 1   | 46,259,755   | t  | c  |                                             |        |        |          |                                            |        |        |          |
| rs7603193          | 2   | 60,332,231   | t  | c  |                                             |        |        |          |                                            |        |        |          |
| rs744653           | 2   | 190,086,995  | t  | c  |                                             |        |        |          |                                            |        |        |          |
| rs4376025          | 3   | 3,394,984    | t  | c  |                                             |        |        |          |                                            |        |        |          |
| rs8177240          | 3   | 134,960,391  | t  | g  | 0.669                                       | -0.073 | 0.011  | 2.37E-12 | 0.669                                      | -0.067 | 0.012  | 8.84E-09 |
| rs2061336          | 3   | 166,074,312  | a  | g  |                                             |        |        |          |                                            |        |        |          |
| rs9990333          | 3   | 197,311,602  | t  | c  |                                             |        |        |          |                                            |        |        |          |
| rs4547769          | 4   | 73,299,023   | a  | g  |                                             |        |        |          |                                            |        |        |          |
| rs17236666         | 5   | 50,976,465   | t  | c  |                                             |        |        |          |                                            |        |        |          |
| rs1800562          | 6   | 26,201,120   | a  | g  | 0.067                                       | 0.372  | 0.020  | 3.96E-77 | 0.068                                      | 0.376  | 0.022  | 1.87E-66 |
| rs4895441          | 6   | 135,468,266  | a  | g  |                                             |        |        |          |                                            |        |        |          |
| rs2075672          | 7   | 100,078,232  | a  | g  | 0.379                                       | -0.056 | 0.010  | 5.95E-08 | 0.375                                      | -0.068 | 0.011  | 2.41E-09 |
| rs1495741          | 8   | 18,317,161   | a  | g  |                                             |        |        |          |                                            |        |        |          |
| rs604302           | 8   | 37,123,727   | t  | c  | 0.200                                       | 0.058  | 0.012  | 3.07E-06 | 0.202                                      | 0.042  | 0.014  | 0.0020   |
| rs1354342          | 8   | 107,270,156  | a  | g  |                                             |        |        |          |                                            |        |        |          |
| rs1752162          | 9   | 125,590,858  | t  | c  |                                             |        |        |          |                                            |        |        |          |
| rs651007           | 9   | 135,143,696  | t  | c  |                                             |        |        |          |                                            |        |        |          |
| rs7395347          | 11  | 9,109,039    | t  | c  |                                             |        |        |          |                                            |        |        |          |
| rs6486121          | 11  | 13,312,346   | t  | c  |                                             |        |        |          |                                            |        |        |          |
| rs174577           | 11  | 61,361,390   | a  | c  |                                             |        |        |          |                                            |        |        |          |
| rs11046313         | 12  | 22,166,055   | a  | c  |                                             |        |        |          |                                            |        |        |          |
| rs12371237         | 12  | 29,722,343   | a  | c  |                                             |        |        |          |                                            |        |        |          |
| rs2374503          | 12  | 104,558,959  | c  | g  |                                             |        |        |          |                                            |        |        |          |
| rs16976620         | 15  | 43,037,184   | a  | g  |                                             |        |        |          |                                            |        |        |          |
| rs7172337          | 15  | 59,555,035   | t  | c  | 0.728                                       | -0.052 | 0.011  | 2.63E-06 | 0.726                                      | -0.042 | 0.012  | 0.00071  |
| rs4790859          | 17  | 1,844,570    | a  | g  |                                             |        |        |          |                                            |        |        |          |
| rs411988           | 17  | 54,064,033   | a  | g  |                                             |        |        |          |                                            |        |        |          |
| rs12978009         | 19  | 16,974,634   | a  | g  |                                             |        |        |          |                                            |        |        |          |
| rs6067410          | 20  | 48,407,319   | a  | t  | 0.456                                       | -0.047 | 0.010  | 3.93E-06 | 0.457                                      | -0.048 | 0.011  | 2.28E-05 |
| rs2275901          | 22  | 17,515,603   | a  | g  |                                             |        |        |          |                                            |        |        |          |
| rs855791           | 22  | 35,792,882   | a  | g  | 0.446                                       | -0.187 | 0.010  | 4.31E-77 | 0.445                                      | -0.185 | 0.011  | 8.15E-61 |

| Marker Information |     |              |    |    | Transferrin                                    |        |        |           |                                               |        |        |           |
|--------------------|-----|--------------|----|----|------------------------------------------------|--------|--------|-----------|-----------------------------------------------|--------|--------|-----------|
| SNP                | CHR | BP (build36) | A1 | A2 | Before excluding subjects<br>with low ferritin |        |        |           | After excluding subjects<br>with low ferritin |        |        |           |
|                    |     |              |    |    | Freq                                           | Effect | StdErr | P.value   | Freq                                          | Effect | StdErr | P.value   |
| rs946526           | 1   | 46,259,755   | t  | c  | 0.042                                          | -0.122 | 0.026  | 2.98E-06  | 0.043                                         | -0.091 | 0.030  | 0.0022    |
| rs7603193          | 2   | 60,332,231   | t  | c  |                                                |        |        |           |                                               |        |        |           |
| rs744653           | 2   | 190,086,995  | t  | c  | 0.854                                          | 0.092  | 0.014  | 2.00E-10  | 0.855                                         | 0.082  | 0.016  | 1.92E-07  |
| rs4376025          | 3   | 3,394,984    | t  | c  |                                                |        |        |           |                                               |        |        |           |
| rs8177240          | 3   | 134,960,391  | t  | g  | 0.671                                          | -0.423 | 0.011  | 0         | 0.671                                         | -0.408 | 0.012  | 1.86E-258 |
| rs2061336          | 3   | 166,074,312  | a  | g  |                                                |        |        |           |                                               |        |        |           |
| rs9990333          | 3   | 197,311,602  | t  | c  | 0.460                                          | -0.067 | 0.010  | 3.01E-11  | 0.460                                         | -0.047 | 0.011  | 2.57E-05  |
| rs4547769          | 4   | 73,299,023   | a  | g  | 0.332                                          | -0.050 | 0.011  | 2.25E-06  | 0.333                                         | -0.026 | 0.012  | 0.025     |
| rs17236666         | 5   | 50,976,465   | t  | c  |                                                |        |        |           |                                               |        |        |           |
| rs1800562          | 6   | 26,201,120   | a  | g  | 0.066                                          | -0.550 | 0.021  | 1.26E-153 | 0.067                                         | -0.437 | 0.022  | 2.14E-86  |
| rs4895441          | 6   | 135,468,266  | a  | g  |                                                |        |        |           |                                               |        |        |           |
| rs2075672          | 7   | 100,078,232  | a  | g  |                                                |        |        |           |                                               |        |        |           |
| rs1495741          | 8   | 18,317,161   | a  | g  | 0.782                                          | 0.083  | 0.012  | 1.57E-11  | 0.781                                         | 0.078  | 0.013  | 4.04E-09  |
| rs604302           | 8   | 37,123,727   | t  | c  |                                                |        |        |           |                                               |        |        |           |
| rs1354342          | 8   | 107,270,156  | a  | g  | 0.051                                          | 0.126  | 0.024  | 1.28E-07  | 0.050                                         | 0.094  | 0.026  | 0.00039   |
| rs1752162          | 9   | 125,590,858  | t  | c  |                                                |        |        |           |                                               |        |        |           |
| rs651007           | 9   | 135,143,696  | t  | c  |                                                |        |        |           |                                               |        |        |           |
| rs7395347          | 11  | 9,109,039    | t  | c  |                                                |        |        |           |                                               |        |        |           |
| rs6486121          | 11  | 13,312,346   | t  | c  | 0.627                                          | -0.056 | 0.011  | 1.04E-07  | 0.634                                         | -0.044 | 0.012  | 0.00015   |
| rs174577           | 11  | 61,361,390   | a  | c  | 0.333                                          | 0.068  | 0.011  | 1.90E-10  | 0.332                                         | 0.065  | 0.012  | 3.59E-08  |
| rs11046313         | 12  | 22,166,055   | a  | c  |                                                |        |        |           |                                               |        |        |           |
| rs12371237         | 12  | 29,722,343   | a  | c  | 0.336                                          | -0.050 | 0.011  | 3.48E-06  | 0.340                                         | -0.042 | 0.012  | 0.00036   |
| rs2374503          | 12  | 104,558,959  | c  | g  | 0.421                                          | -0.048 | 0.010  | 2.95E-06  | 0.425                                         | -0.034 | 0.011  | 0.0022    |
| rs16976620         | 15  | 43,037,184   | a  | g  |                                                |        |        |           |                                               |        |        |           |
| rs7172337          | 15  | 59,555,035   | t  | c  |                                                |        |        |           |                                               |        |        |           |
| rs4790859          | 17  | 1,844,570    | a  | g  |                                                |        |        |           |                                               |        |        |           |
| rs411988           | 17  | 54,064,033   | a  | g  |                                                |        |        |           |                                               |        |        |           |
| rs12978009         | 19  | 16,974,634   | a  | g  | 0.179                                          | -0.064 | 0.014  | 3.17E-06  | 0.178                                         | -0.053 | 0.015  | 0.00041   |
| rs6067410          | 20  | 48,407,319   | a  | t  |                                                |        |        |           |                                               |        |        |           |
| rs2275901          | 22  | 17,515,603   | a  | g  | 0.239                                          | 0.060  | 0.013  | 1.77E-06  | 0.238                                         | 0.053  | 0.014  | 0.00016   |
| rs855791           | 22  | 35,792,882   | a  | g  |                                                |        |        |           |                                               |        |        |           |

Supplementary Table 6 (continued)

| Marker Information |     |              |       | Saturation                                     |        |        |           |                                               |        |        |           |
|--------------------|-----|--------------|-------|------------------------------------------------|--------|--------|-----------|-----------------------------------------------|--------|--------|-----------|
| SNP                | CHR | BP (build36) | A1 A2 | Before excluding subjects<br>with low ferritin |        |        |           | After excluding subjects<br>with low ferritin |        |        |           |
|                    |     |              |       | Freq                                           | Effect | StdErr | P.value   | Freq                                          | Effect | StdErr | P.value   |
| rs946526           | 1   | 46,259,755   | t c   |                                                |        |        |           |                                               |        |        |           |
| rs7603193          | 2   | 60,332,231   | t c   |                                                |        |        |           |                                               |        |        |           |
| rs744653           | 2   | 190,086,995  | t c   |                                                |        |        |           |                                               |        |        |           |
| rs4376025          | 3   | 3,394,984    | t c   |                                                |        |        |           |                                               |        |        |           |
| rs8177240          | 3   | 134,960,391  | t g   | 0.669                                          | 0.097  | 0.011  | 5.85E-20  | 0.669                                         | 0.039  | 0.012  | 0.00087   |
| rs2061336          | 3   | 166,074,312  | a g   | 0.913                                          | -0.093 | 0.018  | 1.99E-07  | 0.911                                         | -0.076 | 0.020  | 0.00010   |
| rs9990333          | 3   | 197,311,602  | t c   | 0.460                                          | 0.049  | 0.010  | 7.37E-07  | 0.459                                         | 0.032  | 0.011  | 0.0029    |
| rs4547769          | 4   | 73,299,023   | a g   |                                                |        |        |           |                                               |        |        |           |
| rs17236666         | 5   | 50,976,465   | t c   |                                                |        |        |           |                                               |        |        |           |
| rs1800562          | 6   | 26,201,120   | a g   | 0.067                                          | 0.577  | 0.020  | 1.52E-178 | 0.068                                         | 0.495  | 0.022  | 9.93E-113 |
| rs4895441          | 6   | 135,468,266  | a g   | 0.727                                          | -0.055 | 0.011  | 1.02E-06  | 0.729                                         | -0.042 | 0.012  | 0.00065   |
| rs2075672          | 7   | 100,078,232  | a g   | 0.379                                          | -0.055 | 0.010  | 1.39E-07  | 0.375                                         | -0.063 | 0.011  | 3.50E-08  |
| rs1495741          | 8   | 18,317,161   | a g   |                                                |        |        |           |                                               |        |        |           |
| rs604302           | 8   | 37,123,727   | t c   | 0.200                                          | 0.058  | 0.012  | 3.26E-06  | 0.203                                         | 0.047  | 0.014  | 0.00055   |
| rs1354342          | 8   | 107,270,156  | a g   |                                                |        |        |           |                                               |        |        |           |
| rs1752162          | 9   | 125,590,858  | t c   |                                                |        |        |           |                                               |        |        |           |
| rs651007           | 9   | 135,143,696  | t c   |                                                |        |        |           |                                               |        |        |           |
| rs7395347          | 11  | 9,109,039    | t c   |                                                |        |        |           |                                               |        |        |           |
| rs6486121          | 11  | 13,312,346   | t c   |                                                |        |        |           |                                               |        |        |           |
| rs174577           | 11  | 61,361,390   | a c   |                                                |        |        |           |                                               |        |        |           |
| rs11046313         | 12  | 22,166,055   | a c   | 0.286                                          | -0.056 | 0.011  | 6.86E-07  | 0.291                                         | -0.045 | 0.013  | 0.00034   |
| rs12371237         | 12  | 29,722,343   | a c   |                                                |        |        |           |                                               |        |        |           |
| rs2374503          | 12  | 104,558,959  | c g   |                                                |        |        |           |                                               |        |        |           |
| rs16976620         | 15  | 43,037,184   | a g   |                                                |        |        |           |                                               |        |        |           |
| rs7172337          | 15  | 59,555,035   | t c   |                                                |        |        |           |                                               |        |        |           |
| rs4790859          | 17  | 1,844,570    | a g   | 0.474                                          | 0.048  | 0.010  | 2.29E-06  | 0.473                                         | 0.032  | 0.011  | 0.0052    |
| rs411988           | 17  | 54,064,033   | a g   |                                                |        |        |           |                                               |        |        |           |
| rs12978009         | 19  | 16,974,634   | a g   |                                                |        |        |           |                                               |        |        |           |
| rs6067410          | 20  | 48,407,319   | a t   |                                                |        |        |           |                                               |        |        |           |
| rs2275901          | 22  | 17,515,603   | a g   |                                                |        |        |           |                                               |        |        |           |
| rs855791           | 22  | 35,792,882   | a g   | 0.446                                          | -0.192 | 0.010  | 3.50E-80  | 0.445                                         | -0.181 | 0.011  | 5.23E-58  |

| Marker Information |     |              |    |    | Ferritin                                       |        |        |          |                                               |        |        |          |
|--------------------|-----|--------------|----|----|------------------------------------------------|--------|--------|----------|-----------------------------------------------|--------|--------|----------|
| SNP                | CHR | BP (build36) | A1 | A2 | Before excluding subjects<br>with low ferritin |        |        |          | After excluding subjects<br>with low ferritin |        |        |          |
|                    |     |              |    |    | Freq                                           | Effect | StdErr | P.value  | Freq                                          | Effect | StdErr | P.value  |
| rs946526           | 1   | 46,259,755   | t  | c  |                                                |        |        |          |                                               |        |        |          |
| rs7603193          | 2   | 60,332,231   | t  | c  | 0.033                                          | -0.129 | 0.027  | 1.38E-06 | 0.033                                         | -0.097 | 0.030  | 0.0011   |
| rs744653           | 2   | 190,086,995  | t  | c  | 0.855                                          | -0.098 | 0.013  | 1.20E-13 | 0.855                                         | -0.092 | 0.015  | 3.55E-10 |
| rs4376025          | 3   | 3,394,984    | t  | c  | 0.680                                          | 0.046  | 0.010  | 3.62E-06 | 0.680                                         | 0.028  | 0.011  | 0.012    |
| rs8177240          | 3   | 134,960,391  | t  | g  |                                                |        |        |          |                                               |        |        |          |
| rs2061336          | 3   | 166,074,312  | a  | g  |                                                |        |        |          |                                               |        |        |          |
| rs9990333          | 3   | 197,311,602  | t  | c  |                                                |        |        |          |                                               |        |        |          |
| rs4547769          | 4   | 73,299,023   | a  | g  |                                                |        |        |          |                                               |        |        |          |
| rs17236666         | 5   | 50,976,465   | t  | c  | 0.950                                          | 0.100  | 0.022  | 4.39E-06 | 0.951                                         | 0.074  | 0.025  | 0.0028   |
| rs1800562          | 6   | 26,201,120   | a  | g  | 0.068                                          | 0.211  | 0.019  | 1.43E-29 | 0.069                                         | 0.265  | 0.021  | 2.73E-38 |
| rs4895441          | 6   | 135,468,266  | a  | g  |                                                |        |        |          |                                               |        |        |          |
| rs2075672          | 7   | 100,078,232  | a  | g  |                                                |        |        |          |                                               |        |        |          |
| rs1495741          | 8   | 18,317,161   | a  | g  |                                                |        |        |          |                                               |        |        |          |
| rs604302           | 8   | 37,123,727   | t  | c  |                                                |        |        |          |                                               |        |        |          |
| rs1354342          | 8   | 107,270,156  | a  | g  |                                                |        |        |          |                                               |        |        |          |
| rs1752162          | 9   | 125,590,858  | t  | c  | 0.146                                          | 0.061  | 0.013  | 4.80E-06 | 0.148                                         | 0.044  | 0.015  | 0.0032   |
| rs651007           | 9   | 135,143,696  | t  | c  | 0.203                                          | -0.060 | 0.012  | 2.54E-07 | 0.200                                         | -0.068 | 0.013  | 1.65E-07 |
| rs7395347          | 11  | 9,109,039    | t  | c  | 0.341                                          | 0.045  | 0.010  | 3.20E-06 | 0.344                                         | 0.043  | 0.011  | 6.45E-05 |
| rs6486121          | 11  | 13,312,346   | t  | c  |                                                |        |        |          |                                               |        |        |          |
| rs174577           | 11  | 61,361,390   | a  | c  |                                                |        |        |          |                                               |        |        |          |
| rs11046313         | 12  | 22,166,055   | a  | c  |                                                |        |        |          |                                               |        |        |          |
| rs12371237         | 12  | 29,722,343   | a  | c  |                                                |        |        |          |                                               |        |        |          |
| rs2374503          | 12  | 104,558,959  | c  | g  |                                                |        |        |          |                                               |        |        |          |
| rs16976620         | 15  | 43,037,184   | a  | g  | 0.098                                          | -0.081 | 0.016  | 4.52E-07 | 0.096                                         | -0.054 | 0.018  | 0.0029   |
| rs7172337          | 15  | 59,555,035   | t  | c  |                                                |        |        |          |                                               |        |        |          |
| rs4790859          | 17  | 1,844,570    | a  | g  |                                                |        |        |          |                                               |        |        |          |
| rs411988           | 17  | 54,064,033   | a  | g  | 0.564                                          | -0.049 | 0.009  | 1.28E-07 | 0.564                                         | -0.040 | 0.010  | 0.00012  |
| rs12978009         | 19  | 16,974,634   | a  | g  |                                                |        |        |          |                                               |        |        |          |
| rs6067410          | 20  | 48,407,319   | a  | t  |                                                |        |        |          |                                               |        |        |          |
| rs2275901          | 22  | 17,515,603   | a  | g  |                                                |        |        |          |                                               |        |        |          |
| rs855791           | 22  | 35,792,882   | a  | g  | 0.445                                          | -0.051 | 0.010  | 5.81E-08 | 0.444                                         | -0.062 | 0.011  | 3.83E-09 |

**Supplementary Table 7.**(a) Summary of published data on gene expression at loci containing significant SNP associations or significant results from gene-based test, from [eQTL.chicago.edu/cgi-bin/gbrowse/eqt/](http://eQTL.chicago.edu/cgi-bin/gbrowse/eqt/), accessed 2014-02-18; (b) significant expression results from meta-analysis of data for peripheral blood cells, <http://genenetwork.nl/bloodeqtlbrowser/>, accessed 2014-02-18; (c) significant results for gene expression in macrophages or monocytes.

(a)

| Chr (Mbp) | Candidate Gene  | Summary of published eQTL data <sup>1</sup>                                                    |
|-----------|-----------------|------------------------------------------------------------------------------------------------|
| 2 (190)   | <i>SLC40A1</i>  | No reported eQTLs                                                                              |
| 3 (133)   | <i>TF</i>       | Multiple eQTLs for <i>SRPRB</i> in LCLs or monocytes, but not for <i>TF</i>                    |
| 3 (195)   | <i>TFRC</i>     | rs9990333 is an eQTL for LOC440993                                                             |
| 6 (26)    | <i>HFE</i>      | rs198853 is an eQTL for <i>HFE</i> in liver                                                    |
| 7 (100)   | <i>TFR2</i>     | Region contains eQTLs for <i>TFR2</i> (rs10247962, rs1052897, rs4729598, rs4729600, rs7457868) |
| 8 (18)    | <i>NAT2</i>     | No reported eQTLs                                                                              |
| 9 (136)   | <i>ABO</i>      | No reported eQTLs                                                                              |
| 11 (13)   | <i>ARNTL</i>    | Multiple eQTLs for <i>ARNTL</i> in LCLs or monocytes                                           |
| 11 (61)   | <i>FADS2</i>    | rs174577 is an eQTL for <i>FADS2</i> , <i>CPSF7</i> , <i>NXF1</i>                              |
| 15        | <i>C15orf43</i> | Region contains multiple eQTLs for <i>SORD</i> in LCLs or monocytes                            |
| 17 (56)   | <i>TEX14</i>    | Region contains multiple eQTLs for <i>RAD51C</i> and <i>TRIM37</i> in LCLs or monocytes        |
| 22 (37)   | <i>TMPRSS6</i>  | Region contains eQTL for <i>TMPRSS6</i> in liver                                               |

(b)

| SNP                | Candidate gene    | Probe   | Probe Chr. | Probe Chr. position | Gene name                           | Expression P-value | False discovery rate |
|--------------------|-------------------|---------|------------|---------------------|-------------------------------------|--------------------|----------------------|
| <b>CIS EFFECTS</b> |                   |         |            |                     |                                     |                    |                      |
| rs744653           | <i>SLC40A1</i>    | 730164  | 2          | 190,133,988         | <i>SLC40A1</i>                      | 1.31E-10           | 0                    |
| rs8177240          | <i>TF</i>         | 4480224 | 3          | 135,022,061         | <i>SRPRB</i>                        | 1.36E-91           | 0                    |
| rs8177179          | <i>TF</i>         | 4480224 | 3          | 135,022,061         | <i>SRPRB</i>                        | 3.01E-34           | 0                    |
| rs1799852          | <i>TF</i>         | 4480224 | 3          | 135,022,061         | <i>SRPRB</i>                        | 5.08E-05           | 0.02                 |
| rs9990333          | <i>TFRC</i>       | 2940435 | 3          | 197,260,777         | <i>TFRC</i>                         | 8.84E-06           | 0                    |
| rs1800562          | <i>HFE(C282Y)</i> | 3930377 | 6          | 26,093,147          | <i>TRIM38</i>                       | 6.09E-06           | 0                    |
| rs1800562          | <i>HFE(C282Y)</i> | 6200669 | 6          | 26,266,387          | <i>HIST1H2AC,HIST1H2BD,HIST1H4A</i> | 1.24E-05           | 0.01                 |
| rs1800562          | <i>HFE(C282Y)</i> | 290730  | 6          | 26,279,307          | <i>HIST1H2AC,HIST1H2BD,HIST1H4A</i> | 9.88E-07           | 0                    |
| rs1800562          | <i>HFE(C282Y)</i> | 2970019 | 6          | 26,393,396          | <i>HIST1H4H</i>                     | 1.41E-08           | 0                    |
| rs1799945          | <i>HFE(H63D)</i>  | 3930377 | 6          | 26,093,147          | <i>TRIM38</i>                       | 4.18E-17           | 0                    |
| rs1799945          | <i>HFE(H63D)</i>  | 7210333 | 6          | 26,335,240          | -                                   | 1.00E-22           | 0                    |
| rs7385804          | <i>TFR2</i>       | 580133  | 7          | 100,050,486         | <i>MOSPD3</i>                       | 2.29E-14           | 0                    |
| rs7385804          | <i>TFR2</i>       | 3850703 | 7          | 100,050,557         | <i>MOSPD3</i>                       | 5.70E-09           | 0                    |
| rs7385804          | <i>TFR2</i>       | 1260730 | 7          | 100,238,327         | <i>EPHB4</i>                        | 2.72E-34           | 0                    |
| rs7385804          | <i>TFR2</i>       | 110450  | 7          | 100,302,456         | <i>SLC12A9</i>                      | 1.29E-05           | 0.01                 |
| rs4921915          | <i>NAT2</i>       |         |            |                     | No reported cis-eQTL effect         | -                  | -                    |
| rs651007           | <i>ABO</i>        | 4490687 | 9          | 135,018,261         | <i>GBGT1</i>                        | 6.35E-06           | 0                    |
| rs651007           | <i>ABO</i>        | 2600452 | 9          | 135,187,879         | <i>SURF6</i>                        | 8.04E-07           | 0                    |

| SNP                  | Candidate gene | Probe   | Probe Chr. | Probe Chr. position | Gene name                   | Expression P-value | False discovery rate |
|----------------------|----------------|---------|------------|---------------------|-----------------------------|--------------------|----------------------|
| rs6486121            | ARNTL          |         |            |                     | No reported cis-eQTL effect | -                  | -                    |
| rs174577             | FADS2          | 630445  | 11         | 61,313,884          | C11orf10                    | 5.51E-54           | 0                    |
| rs174577             | FADS2          | 2360020 | 11         | 61,324,012          | FADS1                       | 4.45E-33           | 0                    |
| rs174577             | FADS2          | 380224  | 11         | 61,390,508          | FADS2                       | 8.44E-15           | 0                    |
| rs411988             | TEX14          | 4670458 | 17         | 53,952,688          | SEPT4                       | 1.36E-07           | 0                    |
| rs411988             | TEX14          | 5910215 | 17         | 54,127,426          | RAD51C                      | 3.13E-33           | 0                    |
| rs411988             | TEX14          | 7610129 | 17         | 54,129,167          | RAD51C                      | 4.17E-50           | 0                    |
| rs411988             | TEX14          | 510544  | 17         | 54,154,786          | RAD51C                      | 4.05E-41           | 0                    |
| rs228916             | TMPRSS6        |         |            |                     | No reported cis-eQTL effect | -                  | -                    |
| rs855791             | TMPRSS6        |         |            |                     | No reported cis-eQTL effect | -                  | -                    |
| <b>TRANS EFFECTS</b> |                |         |            |                     |                             |                    |                      |
| rs1800562            | HFE(C282Y)     | 2940446 | 20         | 36,199,898          | TGM2                        | 4.97E-08           | 0.01                 |
| rs1800562            | HFE(C282Y)     | 4180768 | X          | 55,052,299          | ALAS2                       | 5.53E-10           | 0                    |
| rs1800562            | HFE(C282Y)     | 1230376 | X          | 55,056,672          | ALAS2                       | 1.53E-11           | 0                    |
| rs1799945            | HFE(H63D)      | 4180768 | X          | 55,052,299          | ALAS2                       | 3.24E-09           | 0                    |
| rs1799945            | HFE(H63D)      | 1230376 | X          | 55,056,672          | ALAS2                       | 6.82E-10           | 0                    |
| rs855791             | TMPRSS6(V736A) | 4180768 | X          | 55,052,299          | ALAS2                       | 1.54E-10           | 0                    |
| rs855791             | TMPRSS6(V736A) | 1230376 | X          | 55,056,672          | ALAS2                       | 4.23E-10           | 0                    |

(c) Macrophage and monocyte data, significant associations with gene expression.

| Chr (SNP)      | Candidate<br>Gene | Other cells (monocytes, macrophages)                                                                           |
|----------------|-------------------|----------------------------------------------------------------------------------------------------------------|
| 9 (rs651007)   | <i>ABO</i>        | rs651007 affects expression at <i>SNORD36A</i> (in macrophages $p=0.0066$ ; in monocytes $p=0.030$ )           |
| 11 (rs6486121) | <i>ARNTL</i>      | rs6486121 affects expression at <i>ARNT</i> Lin monocytes ( $p=0.0033$ ) but not in macrophages ( $p=0.297$ )  |
| 11 (rs174577)  | <i>FADS2</i>      | rs174577 affects expression at <i>RAB3IL1</i> in macrophages ( $p=0.049$ ;) but not in monocytes ( $p=0.550$ ) |

**Supplementary Table 8.** Associations with (a) erythrocyte or (b) lipid phenotypes at loci associated with iron phenotypes in this study; and associations with iron phenotypes at loci previously reported to affect (c) erythrocyte or (d) lipid phenotypes.

p(Fe), p(Tf), p(Sat) and p(Ferri) are p-values for allelic association for serum iron, transferrin, transferrin saturation and (log-transformed) ferritin, respectively. For the erythrocyte and lipid phenotypes: HB = haemoglobin, MCH = mean cell haemoglobin, MCHC = mean cell haemoglobin concentration, MCV = mean cell volume, PCV = packed cell volume, RBC = red blood cell count; TC = total cholesterol, HDL = high-density-lipoprotein cholesterol, LDL = high-density-lipoprotein cholesterol, TG = (log-transformed) triglycerides.

(a) Associations with erythrocyte phenotypes at loci found to be significant in this study for iron phenotypes. Erythrocyte data are from van der Harst et al, Nature 2012;492:369-75; empty cells had no results reported.

**Lead SNPs at GW-significant loci for iron phenotypes**

| SNP       | chr:bp(Build37) | LOCUS           | A1 | A2 | Hemoglobin |       |          | Beta   | RBC   |          |   | MCH    |       |          | MCV    |       |          |
|-----------|-----------------|-----------------|----|----|------------|-------|----------|--------|-------|----------|---|--------|-------|----------|--------|-------|----------|
|           |                 |                 |    |    | Beta       | SE    | p        |        | Beta  | SE       | p | Beta   | SE    | p        | Beta   | SE    | p        |
| rs744653  | chr2:190378750  | WDR75-SLC40A1   |    |    |            |       |          |        |       |          |   |        |       |          |        |       |          |
| rs8177240 | chr3:133477701  | TF              |    |    |            |       |          |        |       |          |   |        |       |          |        |       |          |
| rs9990333 | chr3:195827205  | TFRC            | t  | c  |            |       |          |        |       |          |   | -0.060 | 0.010 | 1.33E-10 | -0.138 | 0.025 | 1.06E-08 |
| rs1799945 | chr6:26091179   | HFE (H63D)      | c  | g  | -0.094     | 0.009 | 3.60E-26 |        |       |          |   | -0.217 | 0.015 | 4.01E-47 | -0.463 | 0.040 | 2.35E-33 |
| rs1800562 | chr6:26093141   | HFE (C282Y)     | a  | g  | 0.110      | 0.016 | 5.57E-13 |        |       |          |   | 0.425  | 0.028 | 6.50E-56 | 0.943  | 0.072 | 1.25E-42 |
| rs7385804 | chr7:100235970  | TFR2            | a  | c  |            |       |          | -0.020 | 0.002 | 1.58E-17 |   | 0.084  | 0.011 | 3.12E-16 | 0.216  | 0.029 | 1.79E-15 |
| rs4921915 | chr8:18272466   | NAT2            |    |    |            |       |          |        |       |          |   |        |       |          |        |       |          |
| rs651007  | chr9:136153875  | ABO             | t  | c  | -0.053     | 0.008 | 3.82E-14 | -0.021 | 0.003 | 1.61E-14 |   |        |       |          |        |       |          |
| rs6486121 | chr11:13355770  | ARNTL           |    |    |            |       |          |        |       |          |   |        |       |          |        |       |          |
| rs174577  | chr11:61604814  | FADS2           |    |    |            |       |          |        |       |          |   |        |       |          |        |       |          |
| rs411988  | chr17:56709034  | TEX14           |    |    |            |       |          |        |       |          |   |        |       |          |        |       |          |
| rs855791  | chr22:37462936  | TMPRSS6 (V736A) | a  | g  | -0.079     | 0.006 | 4.65E-40 |        |       |          |   | -0.193 | 0.011 | 1.01E-69 | -0.426 | 0.029 | 2.40E-54 |

(b) Associations with lipid phenotypes at loci found to be significant in this study for iron phenotypes. Lipid data from Willer et al., Nature Genetics 2013;45:1274-83, at <http://www.sph.umich.edu/csg/abecasis/public/lipids2013/>, accessed 2013-12-05.

| SNP       | Build37        | LOCUS          | Total cholesterol |        |          | LDL-C  |        |          | HDL-C  |        |          | Triglycerides |        |          |
|-----------|----------------|----------------|-------------------|--------|----------|--------|--------|----------|--------|--------|----------|---------------|--------|----------|
|           |                |                | Beta              | SE     | p        | Beta   | SE     | p        | Beta   | SE     | p        | Beta          | SE     | p        |
| rs744653  | chr2:190378750 | WDR75-SLC40A1  | 0.0086            | 0.0072 | 0.085    | 0.0127 | 0.0074 | 0.027    | 0.0127 | 0.0069 | 0.078    | 0.0103        | 0.0067 | 0.132    |
| rs8177240 | chr3:133477701 | TF             | 0.0091            | 0.0054 | 0.136    | 0.0065 | 0.0055 | 0.468    | 0.0010 | 0.0050 | 0.632    | 0.0066        | 0.0050 | 0.301    |
| rs9990333 | chr3:195827205 | TFRC           | 0.0043            | 0.0052 | 0.539    | 0.0022 | 0.0053 | 0.613    | 0.0022 | 0.0048 | 0.941    | 0.0023        | 0.0047 | 0.602    |
| rs1800562 | chr6:26093141  | HFE(C282Y)     | 0.0565            | 0.0077 | 1.91E-12 | 0.0615 | 0.0080 | 8.25E-14 | 0.0074 | 0.0074 | 0.242    | 0.0130        | 0.0072 | 0.172    |
| rs1799945 | chr6:26091179  | HFE(H63D)      | 0.0096            | 0.0051 | 0.055    | 0.0110 | 0.0053 | 0.020    | 0.0024 | 0.0050 | 0.460    | 0.0062        | 0.0048 | 0.098    |
| rs7385804 | chr7:100235970 | TFR2           | 0.0041            | 0.0054 | 0.457    | 0.0033 | 0.0055 | 0.599    | 0.0053 | 0.0051 | 0.319    | 0.0054        | 0.0049 | 0.175    |
| rs4921915 | chr8:18272466  | NAT2           | 0.0315            | 0.0044 | 6.71E-13 | 0.0222 | 0.0046 | 1.35E-06 | 0.0002 | 0.0042 | 0.680    | 0.0350        | 0.0041 | 1.33E-15 |
| rs651007  | chr9:136153875 | ABO            | 0.0647            | 0.0065 | 5.23E-21 | 0.0663 | 0.0066 | 4.52E-21 | 0.0119 | 0.0061 | 0.087    | 0.0119        | 0.0061 | 0.065    |
| rs6486121 | chr11:13355770 | ARNTL          | 0.0071            | 0.0036 | 0.110    | 0.0075 | 0.0037 | 0.084    | 0.0186 | 0.0035 | 5.52E-07 | 0.0169        | 0.0034 | 1.37E-06 |
| rs174577  | chr11:61604814 | FADS2          | 0.0485            | 0.0037 | 1.05E-37 | 0.0523 | 0.0038 | 1.04E-40 | 0.0386 | 0.0035 | 9.74E-27 | 0.0429        | 0.0034 | 7.56E-35 |
| rs411988  | chr17:56709034 | TEX14          | 0.0055            | 0.0051 | 0.481    | 0.0064 | 0.0052 | 0.270    | 0.0025 | 0.0048 | 0.891    | 0.0047        | 0.0047 | 0.359    |
| rs855791  | chr22:37462936 | TMPRSS6(V736A) | 0.0061            | 0.0037 | 0.078    | 0.0104 | 0.0038 | 0.0035   | 0.0029 | 0.0035 | 0.467    | 0.0057        | 0.0034 | 0.054    |

(c) Associations with iron phenotypes, at all loci reported for erythrocyte phenotypes by van der Harst et al, Nature 2012;492:369-75. For overlap with the 75 erythrocyte loci, the critical p-value is  $(0.05/75)=6.67 \times 10^{-4}$ ; values below this are shown in bold type.

| Candidate genes           | Loci reported to affect erythrocyte phenotypes |     |               |           | From GISC discovery meta-analysis |       |        |          | Comments                           |
|---------------------------|------------------------------------------------|-----|---------------|-----------|-----------------------------------|-------|--------|----------|------------------------------------|
|                           | Marker name                                    | Chr | Position(B36) | Phenotype | p(Fe)                             | p(Tf) | p(Sat) | p(Ferri) |                                    |
| <i>CCDC27,LRRC48</i>      | rs1175550                                      | 1   | 3,681,388     | MCHC      | 0.940                             | 0.949 | 0.790  | 0.614    |                                    |
| <i>HEYL</i>               | rs3916164                                      | 1   | 39,842,526    | MCH       | 0.891                             | 0.774 | 0.717  | 0.357    |                                    |
| <i>TAL1</i>               | rs741959                                       | 1   | 47,448,820    | MCV       | 0.945                             | 0.528 | 0.929  | 0.551    |                                    |
| <i>OR6Y1,OR10Z1,SPTA1</i> | rs857684                                       | 1   | 156,842,353   | MCHC      | 0.999                             | 0.420 | 0.956  | 0.599    |                                    |
| <i>MIR181A1</i>           | rs7529925                                      | 1   | 197,273,831   | RBC       | 0.722                             | 0.224 | 0.295  | 0.679    |                                    |
| <i>ATP2B4</i>             | rs7551442                                      | 1   | 201,921,744   | MCHC      | 0.216                             | 0.143 | 0.055  | 0.0053   |                                    |
| <i>TMCC2</i>              | rs9660992                                      | 1   | 203,516,073   | MCH       | 0.764                             | 0.351 | 0.964  | 0.256    |                                    |
| <i>TRIM58</i>             | rs3811444                                      | 1   | 246,106,074   | RBC       | -                                 | -     | -      | -        | No results for this SNP or proxies |

| Candidate genes                     | Loci reported to affect erythrocyte phenotypes |     |               |           | From GISC discovery meta-analysis |                  |                  |                 | Comments |
|-------------------------------------|------------------------------------------------|-----|---------------|-----------|-----------------------------------|------------------|------------------|-----------------|----------|
|                                     | Marker name                                    | Chr | Position(B36) | Phenotype | p(Fe)                             | p(Tf)            | p(Sat)           | p(Ferri)        |          |
| <i>PRKCE</i>                        | rs4953318                                      | 2   | 46,208,555    | PCV       | 0.582                             | 0.073            | 0.974            | 0.260           |          |
| <i>BCL11A</i>                       | rs243070                                       | 2   | 60,473,790    | MCV       | 0.258                             | 0.953            | 0.467            | 0.181           |          |
| <i>ACOXL</i>                        | rs10207392                                     | 2   | 111,566,130   | MCV       | 0.221                             | 0.522            | 0.158            | 0.236           |          |
| <i>THRB</i>                         | rs9310736                                      | 3   | 24,325,815    | MCV       | 0.060                             | 0.732            | 0.207            | 0.034           |          |
| <i>RASA2</i>                        | rs6776003                                      | 3   | 142,749,183   | MCV       | 0.226                             | 0.746            | 0.383            | 0.929           |          |
| <i>XRN1</i>                         | rs13061823                                     | 3   | 143,603,476   | MCV       | 0.0065                            | 0.624            | 0.049            | 0.607           |          |
| <i>TFRC</i>                         | rs11717368                                     | 3   | 197,318,754   | MCH       | 0.288                             | <b>2.98E-08</b>  | <b>4.68E-04</b>  | 0.262           |          |
| <i>KIT</i>                          | rs218238                                       | 4   | 55,089,781    | RBC       | 0.304                             | 0.334            | 0.083            | 0.642           |          |
| <i>BBS7,CCNA2</i>                   | rs13152701                                     | 4   | 122,970,511   | MCV       | 0.335                             | 0.240            | 0.468            | 0.042           |          |
| <i>GMPR</i>                         | rs6914805                                      | 6   | 16,389,166    | MCH       | 0.812                             | 0.956            | 0.742            | 0.168           |          |
| <i>HFE,SLC17A3</i>                  | rs1408272                                      | 6   | 25,950,930    | MCH       | <b>1.63E-64</b>                   | <b>1.24E-134</b> | <b>6.76E-152</b> | <b>2.22E-24</b> |          |
| <i>HIST1H2AM,HIST1H2BO,HIST1H3J</i> | rs13219787                                     | 6   | 27,969,649    | MCH       | <b>4.61E-24</b>                   | <b>1.71E-61</b>  | <b>2.50E-60</b>  | <b>7.78E-08</b> |          |
| <i>TRIM39-RPP21</i>                 | rs2097775                                      | 6   | 30,462,282    | HB        | <b>5.73E-06</b>                   | <b>2.67E-15</b>  | <b>8.12E-15</b>  | <b>3.60E-06</b> |          |
| <i>HLA-DQA1,HLA-DQA2</i>            | rs9272219                                      | 6   | 32,710,247    | RBC       | 0.235                             | 0.065            | 0.086            | 0.055           |          |
| <i>CCND3</i>                        | rs9349204                                      | 6   | 42,022,356    | MCV       | 0.441                             | 0.393            | 0.195            | 0.679           |          |
| <i>VEGFA</i>                        | rs9369427                                      | 6   | 43,919,408    | HB        | 0.500                             | 0.614            | 0.300            | 0.799           |          |
| <i>CCDC162P</i>                     | rs1008084                                      | 6   | 109,733,658   | MCH       | 0.051                             | 0.246            | 0.027            | 0.544           |          |
| <i>HBS1L</i>                        | rs9389269                                      | 6   | 135,468,852   | MCV       | <b>6.35E-06</b>                   | 0.0053           | <b>9.78E-07</b>  | 0.489           |          |
| <i>CITED2</i>                       | rs590856                                       | 6   | 139,886,122   | MCV       | 0.708                             | 0.693            | 0.739            | 0.930           |          |
| <i>QKI</i>                          | rs736661                                       | 6   | 164,402,826   | MCH       | 0.191                             | 0.016            | 0.046            | 0.681           |          |
| <i>IKZF1</i>                        | rs12718598                                     | 7   | 50,395,939    | MCV       | 0.955                             | 0.017            | 0.436            | 0.095           |          |
| <i>ACTL6B,TFR2</i>                  | rs2075672                                      | 7   | 100,078,232   | RBC       | <b>5.95E-08</b>                   | 0.391            | <b>1.39E-07</b>  | 0.025           |          |
| <i>PRKAG2</i>                       | rs10480300                                     | 7   | 151,036,938   | HB        | 0.826                             | 0.922            | 0.805            | 0.625           |          |
| <i>ANK1</i>                         | rs4737009                                      | 8   | 41,749,562    | MCHC      | 0.029                             | 0.317            | 0.167            | 0.458           |          |
| <i>C8orf40</i>                      | rs6987853                                      | 8   | 42,576,607    | MCHC      | 0.142                             | 0.792            | 0.233            | 0.866           |          |
| <i>RCL1</i>                         | rs2236496                                      | 9   | 4,834,265     | MCV       | 0.755                             | 0.189            | 0.401            | 0.067           |          |
| <i>ABO</i>                          | rs579459                                       | 9   | 135,143,989   | RBC       | 0.476                             | 0.224            | 0.168            | <b>4.52E-07</b> |          |
| <i>MARCH8</i>                       | rs901683                                       | 10  | 45,286,428    | MCV       | 0.124                             | 0.821            | 0.467            | 0.496           |          |
| <i>HK1</i>                          | rs10159477                                     | 10  | 70,769,894    | HB        | 0.236                             | -                | 0.032            | -               |          |
| <i>NKX2-3</i>                       | rs11190134                                     | 10  | 101,272,190   | MCH       | 0.675                             | 0.423            | 0.977            | 0.817           |          |
| <i>AKIP1,C11orf16,NRIP3,ST5</i>     | rs11042125                                     | 11  | 8,894,625     | HB        | 0.158                             | 0.830            | 0.264            | 0.191           |          |
| <i>SBF2</i>                         | rs7936461                                      | 11  | 9,997,462     | PCV       | 0.632                             | 0.089            | 0.826            | 0.141           |          |

| Loci reported to affect erythrocyte phenotypes               |             |     |               |           | From GISC discovery meta-analysis |        |        |                 | Comments |
|--------------------------------------------------------------|-------------|-----|---------------|-----------|-----------------------------------|--------|--------|-----------------|----------|
| Candidate genes                                              | Marker name | Chr | Position(B36) | Phenotype | p(Fe)                             | p(Tf)  | p(Sat) | p(Ferri)        |          |
| <i>CORO1B,PTPRCAP,RPS6KB2</i>                                | rs2302264   | 11  | 66,964,002    | MCV       | 0.251                             | 0.219  | 0.609  | 0.260           |          |
| <i>ARHGEF17,P2RY6</i>                                        | rs7125949   | 11  | 72,686,732    | HB        | 0.928                             | 0.180  | 0.894  | 0.326           |          |
| <i>CACNA1C</i>                                               | rs7312105   | 12  | 2,393,616     | PCV       | 0.079                             | 0.057  | 0.312  | 0.485           |          |
| <i>CCND2</i>                                                 | rs10849023  | 12  | 4,202,739     | MCH       | 0.264                             | 0.114  | -      | 0.940           |          |
| <i>KITLG</i>                                                 | rs11104870  | 12  | 87,353,425    | RBC       | 0.523                             | 0.124  | 0.141  | 0.382           |          |
| <i>ATXN2,SH2B3</i>                                           | rs3184504   | 12  | 110,368,991   | HB        | 0.646                             | 0.051  | 0.196  | 0.688           |          |
| <i>ACADS,MLEC</i>                                            | rs3829290   | 12  | 119,610,821   | MCV       | 0.392                             | 0.0021 | 0.388  | 0.783           |          |
| <i>FNTB,MAX</i>                                              | rs7155454   | 14  | 64,571,992    | MCH       | 0.116                             | 0.837  | 0.279  | 0.378           |          |
| <i>SMOC1</i>                                                 | rs11627546  | 14  | 69,435,677    | MCV       | 0.020                             | 0.547  | 0.038  | 0.229           |          |
| <i>EIF5</i>                                                  | rs17616316  | 14  | 102,892,515   | MCH       | 0.239                             | 0.512  | 0.226  | 0.206           |          |
| <i>LIPC</i>                                                  | rs1532085   | 15  | 56,470,658    | HB        | 0.292                             | 0.348  | 0.557  | 0.834           |          |
| <i>DENND4A,PTPLAD1</i>                                       | rs2572207   | 15  | 63,857,747    | MCV       | 0.623                             | 0.856  | 0.442  | 0.551           |          |
| <i>PPCDC,SCAMP5</i>                                          | rs8028632   | 15  | 73,108,315    | MCV       | 0.979                             | 0.117  | 0.651  | 0.019           |          |
| <i>NRG4</i>                                                  | rs11072566  | 15  | 74,081,026    | HB        | 0.469                             | 0.884  | 0.562  | 0.505           |          |
| <i>DNAJA4,WDR61</i>                                          | rs2867932   | 15  | 76,378,092    | MCHC      | 0.167                             | 0.949  | 0.118  | 0.800           |          |
| <i>NPRL3</i>                                                 | rs11248850  | 16  | 103,598       | MCH       | 0.200                             | 0.338  | 0.414  | 0.821           |          |
| <i>CTRL,DUS2L,EDC4,NUTF2,PSMB10</i>                          | rs2271294   | 16  | 66,459,827    | RBC       | 0.088                             | 0.789  | 0.180  | 0.226           |          |
| <i>PIEZO1</i>                                                | rs10445033  | 16  | 87,367,963    | MCHC      | 0.977                             | 0.655  | 0.543  | 0.470           |          |
| <i>SPECC1</i>                                                | rs888424    | 17  | 19,926,019    | MCH       | 0.594                             | 0.295  | 0.350  | 0.042           |          |
| <i>C17orf63,ERAL1,NEK8,TRAF4</i>                             | rs2070265   | 17  | 24,099,550    | MCH       | 0.293                             | 0.079  | 0.788  | 0.811           |          |
| <i>CDK12,NEUROD2</i>                                         | rs8182252   | 17  | 34,981,476    | RBC       | 0.443                             | 0.356  | 0.551  | 0.487           |          |
| <i>SLC4A1,UBTF</i>                                           | rs2269906   | 17  | 39,649,863    | MCHC      | 0.925                             | 0.532  | 0.870  | 0.419           |          |
| <i>ARHGAP27,ARL17B,C17orf69,CRHR1,SPPL2C,KANSL1,MAPT,STH</i> | rs12150672  | 17  | 41,182,408    | RBC       | 0.361                             | 0.472  | 0.294  | 0.0051          |          |
| <i>PGS1</i>                                                  | rs4969184   | 17  | 73,905,008    | HB        | 0.414                             | 0.019  | 0.051  | <b>1.84E-04</b> |          |
| <i>C18orf25</i>                                              | rs4890633   | 18  | 42,087,276    | MCH       | 0.029                             | 0.248  | 0.011  | 0.109           |          |
| <i>AP3D1</i>                                                 | rs2159213   | 19  | 2,087,102     | HB        | 0.222                             | 0.007  | 0.955  | 0.143           |          |
| <i>MPND,SH3GL1,UBXN6</i>                                     | rs732716    | 19  | 4,317,219     | MCV       | 0.067                             | 0.344  | 0.078  | 0.245           |          |
| <i>CALR,FARSA,SYCE2</i>                                      | rs741702    | 19  | 12,885,250    | MCH       | 0.247                             | 0.276  | 0.399  | 0.407           |          |
| <i>NUDT19</i>                                                | rs3892630   | 19  | 37,873,324    | MCV       | 0.457                             | 0.652  | 0.553  | 0.254           |          |
| <i>RBM38</i>                                                 | rs737092    | 20  | 55,423,811    | MCV       | 0.748                             | 0.059  | 0.685  | 0.438           |          |
| <i>ATP5O</i>                                                 | rs2032314   | 21  | 34,276,393    | PCV       | 0.178                             | 0.455  | 0.262  | 0.982           |          |

| Loci reported to affect erythrocyte phenotypes |             |     |               |           | From GISC discovery meta-analysis |                 |                 |                 | Comments |
|------------------------------------------------|-------------|-----|---------------|-----------|-----------------------------------|-----------------|-----------------|-----------------|----------|
| Candidate genes                                | Marker name | Chr | Position(B36) | Phenotype | p(Fe)                             | p(Tf)           | p(Sat)          | p(Ferri)        |          |
| <i>UBE2L3,YDJC</i>                             | rs5754217   | 22  | 20,269,675    | MCV       | 0.024                             | 0.292           | 0.032           | 0.363           |          |
| <i>FBXO7</i>                                   | rs5749446   | 22  | 31,210,585    | MCH       | 0.039                             | 0.566           | 0.247           | 0.826           |          |
| <i>KCTD17,TMPRSS6</i>                          | rs855791    | 22  | 35,792,882    | MCH       | <b>4.31E-77</b>                   | <b>1.29E-04</b> | <b>3.50E-80</b> | <b>5.81E-08</b> |          |
| <i>TYMP,NCAPH2,ODF3B,SCO2</i>                  | rs140522    | 22  | 49,318,132    | MCV       | 0.423                             | 0.604           | 0.951           | 0.0042          |          |

(d) Associations with iron phenotypes, at all loci reported significant for lipid phenotypes by Willer et al., Nature Genetics 2013;45:1274-83. For overlap with the 149 lipid loci the critical p-value is  $(0.05/149)=3.36 \times 10^{-4}$ ; values below this are shown in bold type.

| Loci reported to affect lipid phenotypes |             |      |                    |                     | From GISC discovery meta-analysis |                 |        |                 | Comments |
|------------------------------------------|-------------|------|--------------------|---------------------|-----------------------------------|-----------------|--------|-----------------|----------|
| Locus                                    | Marker name | Chr. | hg19 position (Mb) | Associated trait(s) | p(Fe)                             | p(Tf)           | p(Sat) | p(Ferri)        |          |
| <i>ASAP3</i>                             | rs1077514   | 1    | 23.77              | TC                  | 0.346                             | 0.643           | 0.308  | 0.117           |          |
| <i>LDLRAP1</i>                           | rs12027135  | 1    | 25.78              | TC,LDL              | 0.010                             | 0.023           | 0.080  | 0.757           |          |
| <i>PIGV-NR0B2</i>                        | rs12748152  | 1    | 27.14              | HDL,LDL,TG          | 0.076                             | 0.594           | 0.024  | 0.288           |          |
| <i>PABPC4</i>                            | rs4660293   | 1    | 40.03              | HDL                 | 0.540                             | 0.656           | 0.311  | 0.727           |          |
| <i>PCSK9</i>                             | rs2479409   | 1    | 55.50              | LDL,TC              | 0.326                             | 0.996           | 0.246  | -               |          |
| <i>ANGPTL3</i>                           | rs2131925   | 1    | 63.03              | TG,LDL,TC           | 0.176                             | 0.524           | 0.142  | 0.836           |          |
| <i>EVI5</i>                              | rs7515577   | 1    | 93.01              | TC                  | 0.999                             | 0.478           | 0.686  | 0.275           |          |
| <i>SORT1</i>                             | rs629301    | 1    | 109.82             | LDL,TC              | 0.060                             | 0.936           | 0.215  | 0.219           |          |
| <i>ANXA9-CERS2</i>                       | rs267733    | 1    | 150.96             | LDL                 | 0.789                             | 0.126           | 0.339  | 0.832           |          |
| <i>HDGF-PMVK</i>                         | rs12145743  | 1    | 156.70             | HDL                 | 0.905                             | 0.839           | 0.897  | 0.535           |          |
| <i>ANGPTL1</i>                           | rs4650994   | 1    | 178.52             | HDL                 | 0.479                             | 0.096           | 0.866  | 0.242           |          |
| <i>ZNF648</i>                            | rs1689800   | 1    | 182.17             | HDL                 | 0.978                             | 0.097           | 0.747  | 0.184           |          |
| <i>MOSC1</i>                             | rs2642442   | 1    | 220.97             | TC,LDL              | 0.383                             | 0.100           | 0.612  | 0.036           |          |
| <i>GALNT2</i>                            | rs4846914   | 1    | 230.30             | HDL,TG              | 0.0064                            | 0.574           | 0.016  | 0.279           |          |
| <i>IRF2BP2</i>                           | rs514230    | 1    | 234.86             | TC,LDL              | 0.134                             | 0.639           | 0.077  | 0.422           |          |
| <i>APOB</i>                              | rs1367117   | 2    | 21.26              | LDL,TC              | 0.729                             | 0.989           | 0.762  | 0.942           |          |
| <i>GCKR</i>                              | rs1260326   | 2    | 27.73              | TG,TC               | 0.488                             | <b>2.71E-04</b> | 0.026  | 0.482           |          |
| <i>ABCG5/8</i>                           | rs4299376   | 2    | 44.07              | LDL,TC              | 0.038                             | 0.739           | 0.038  | 0.378           |          |
| <i>EHBP1</i>                             | rs2710642   | 2    | 63.15              | LDL                 | 0.647                             | 0.983           | 0.701  | 0.902           |          |
| <i>INSIG2</i>                            | rs10490626  | 2    | 118.84             | LDL,TC              | 0.878                             | 0.656           | 0.881  | 0.184           |          |
| <i>LOC84931</i>                          | rs2030746   | 2    | 121.31             | LDL,TC              | 0.173                             | 0.019           | 0.016  | <b>1.96E-04</b> |          |

## Loci reported to affect lipid phenotypes

## From GISC discovery meta-analysis

| Locus           | Marker name | Chr. | hg19 position (Mb) | Associated trait(s) | p(Fe)  | p(Tf)           | p(Sat) | p(Ferri) | Comments                                        |
|-----------------|-------------|------|--------------------|---------------------|--------|-----------------|--------|----------|-------------------------------------------------|
| <i>RAB3GAP1</i> | rs7570971   | 2    | 135.84             | TC                  | 0.441  | 0.323           | 0.778  | 0.689    | Using rs715 as proxy, R <sup>2</sup> =0.922     |
| <i>COBLL1</i>   | rs12328675  | 2    | 165.54             | HDL                 | 0.813  | 0.397           | 0.857  | 0.441    |                                                 |
| <i>ABCB11</i>   | rs2287623   | 2    | 169.83             | TC                  | 0.157  | 0.917           | 0.373  | 0.877    |                                                 |
| <i>FAM117B</i>  | rs11694172  | 2    | 203.53             | TC                  | 0.588  | 0.162           | 0.767  | 0.924    |                                                 |
| <i>CPS1</i>     | rs1047891   | 2    | 211.54             | HDL                 | 0.958  | <b>1.38E-04</b> | 0.174  | 0.645    |                                                 |
| <i>FN1</i>      | rs1250229   | 2    | 216.30             | LDL                 | 0.300  | 0.770           | 0.256  | 0.839    |                                                 |
| <i>IRS1</i>     | rs2972146   | 2    | 227.10             | HDL,TG              | 0.122  | 0.148           | 0.341  | 0.718    |                                                 |
| <i>UGT1A1</i>   | rs11563251  | 2    | 234.68             | TC,LDL              | 0.259  | 0.026           | 0.704  | 0.615    | Using rs2699429 as proxy, R <sup>2</sup> =0.966 |
| <i>ATG7</i>     | rs2606736   | 3    | 11.40              | HDL                 | 0.480  | 0.110           | 0.849  | 0.159    |                                                 |
| <i>RAF1</i>     | rs2290159   | 3    | 12.63              | TC                  | 0.976  | 0.136           | 0.761  | 0.905    |                                                 |
| <i>CMTM6</i>    | rs7640978   | 3    | 32.53              | LDL,TC              | 0.062  | 0.044           | 0.0052 | 0.457    |                                                 |
| <i>SETD2</i>    | rs2290547   | 3    | 47.06              | HDL                 | 0.0095 | 0.959           | 0.032  | 0.742    |                                                 |
| <i>RBM5</i>     | rs2013208   | 3    | 50.13              | HDL                 | 0.295  | 0.061           | 0.057  | 0.044    |                                                 |
| <i>STAB1</i>    | rs13326165  | 3    | 52.53              | HDL                 | 0.164  | 0.747           | 0.333  | 0.763    |                                                 |
| <i>PXK</i>      | rs13315871  | 3    | 58.38              | TC                  | 0.643  | 0.716           | 0.452  | 0.301    |                                                 |
| <i>GSK3B</i>    | rs6805251   | 3    | 119.56             | HDL                 | 0.043  | 0.180           | 0.0038 | 0.235    |                                                 |
| <i>ACAD11</i>   | rs17404153  | 3    | 132.16             | LDL,HDL             | 0.0012 | 0.974           | 0.0026 | 0.338    |                                                 |
| <i>MSL2L1</i>   | rs645040    | 3    | 135.93             | TG                  | 0.504  | 0.013           | 0.853  | 0.840    |                                                 |
| <i>LRPAP1</i>   | rs6831256   | 4    | 3.47               | TG,TC,LDL           | 0.045  | 0.012           | 0.512  | 0.738    |                                                 |
| <i>C4orf52</i>  | rs10019888  | 4    | 26.06              | HDL                 | 0.778  | 0.108           | 0.328  | 0.842    |                                                 |
| <i>KLHL8</i>    | rs442177    | 4    | 88.03              | TG                  | 0.714  | 0.014           | 0.328  | 0.940    | No results for this SNP or proxies              |
| <i>FAM13A</i>   | rs3822072   | 4    | 89.74              | HDL                 | 0.806  | 0.346           | 0.930  | 0.132    |                                                 |
| <i>ADH5</i>     | rs2602836   | 4    | 100.01             | HDL                 | 0.205  | 0.025           | 0.467  | 0.211    |                                                 |
| <i>SLC39A8</i>  | rs13107325  | 4    | 103.19             | HDL                 | 0.396  | 0.849           | 0.388  | -        |                                                 |
| <i>ARL15</i>    | rs6450176   | 5    | 53.30              | HDL                 | 0.888  | -               | 0.754  | 0.615    |                                                 |
| <i>MAP3K1</i>   | rs9686661   | 5    | 55.86              | TG                  | -      | -               | -      | -        |                                                 |
| <i>HMGCR</i>    | rs12916     | 5    | 74.66              | TC,LDL              | 0.671  | 0.059           | 0.215  | 0.117    |                                                 |
| <i>CSNK1G3</i>  | rs4530754   | 5    | 122.86             | LDL,TC              | 0.155  | 0.917           | 0.096  | 0.288    |                                                 |
| <i>TIMD4</i>    | rs6882076   | 5    | 156.39             | TC,TG,LDL           | 0.131  | 0.776           | 0.312  | 0.170    |                                                 |
| <i>MYLIP</i>    | rs3757354   | 6    | 16.13              | LDL,TC              | 0.175  | 0.060           | 0.415  | -        |                                                 |

## Loci reported to affect lipid phenotypes

## From GISC discovery meta-analysis

| Locus           | Marker name | Chr. | hg19 position (Mb) | Associated trait(s) | p(Fe)           | p(Tf)            | p(Sat)           | p(Ferri)        | Comments                           |
|-----------------|-------------|------|--------------------|---------------------|-----------------|------------------|------------------|-----------------|------------------------------------|
| <i>HFE</i>      | rs1800562   | 6    | 26.09              | LDL,TC              | <b>3.96E-77</b> | <b>1.26E-153</b> | <b>1.52E-178</b> | <b>1.43E-29</b> |                                    |
| <i>HLA</i>      | rs3177928   | 6    | 32.41              | TC,LDL              | 0.354           | 0.701            | 0.517            | 0.0041          |                                    |
| <i>C6orf106</i> | rs2814982   | 6    | 34.55              | TC                  | 0.238           | 0.900            | 0.172            | 0.607           |                                    |
| <i>KCNK17</i>   | rs2758886   | 6    | 39.25              | TC                  | 0.103           | 0.507            | 0.272            | 0.886           |                                    |
| <i>VEGFA</i>    | rs998584    | 6    | 43.76              | TG,HDL              | -               | -                | -                | -               | No results for this SNP or proxies |
| <i>FRK</i>      | rs9488822   | 6    | 116.31             | TC,LDL              | 0.888           | 0.044            | 0.422            | 0.167           |                                    |
| <i>RSPO3</i>    | rs1936800   | 6    | 127.44             | HDL,TG              | 0.232           | 0.329            | 0.140            | 0.043           |                                    |
| <i>HBS1L</i>    | rs9376090   | 6    | 135.41             | TC                  | <b>6.59E-06</b> | 0.0075           | <b>1.32E-06</b>  | 0.355           |                                    |
| <i>CITED2</i>   | rs605066    | 6    | 139.83             | HDL                 | 0.718           | 0.543            | 0.634            | 0.595           |                                    |
| <i>LPA</i>      | rs1564348   | 6    | 160.58             | LDL,TC              | 0.425           | 0.886            | 0.347            | 0.521           |                                    |
| <i>GPR146</i>   | rs1997243   | 7    | 1.08               | TC                  | 0.103           | 0.188            | 0.012            | 0.734           |                                    |
| <i>DAGLB</i>    | rs702485    | 7    | 6.45               | HDL                 | 0.827           | 0.907            | 0.941            | 0.283           |                                    |
| <i>SNX13</i>    | rs4142995   | 7    | 17.92              | HDL                 | 0.977           | 0.978            | 0.523            | 0.598           |                                    |
| <i>DNAH11</i>   | rs12670798  | 7    | 21.61              | TC,LDL              | 0.904           | 1.000            | 0.675            | 0.099           |                                    |
| <i>MIR148A</i>  | rs4722551   | 7    | 25.99              | LDL,TG,TC           | 0.898           | 0.0041           | 0.204            | 0.071           |                                    |
| <i>NPC1L1</i>   | rs2072183   | 7    | 44.58              | TC,LDL              | -               | -                | -                | -               | No results for this SNP or proxies |
| <i>IKZF1</i>    | rs4917014   | 7    | 50.31              | HDL                 | 0.203           | 0.178            | 0.145            | 0.273           |                                    |
| <i>TYW1B</i>    | rs13238203  | 7    | 72.13              | TG                  | 0.541           | 0.881            | 0.539            | 0.819           |                                    |
| <i>MLXIPL</i>   | rs17145738  | 7    | 72.98              | TG,HDL              | 0.260           | 0.077            | 0.096            | 0.666           |                                    |
| <i>MET</i>      | rs38855     | 7    | 116.36             | TG                  | 0.840           | 0.525            | 0.857            | 0.233           |                                    |
| <i>KLF14</i>    | rs4731702   | 7    | 130.43             | HDL                 | 0.656           | 0.504            | 0.880            | 0.948           |                                    |
| <i>TMEM176A</i> | rs17173637  | 7    | 150.53             | HDL                 | 0.013           | 0.514            | 0.055            | 0.491           |                                    |
| <i>PPP1R3B</i>  | rs9987289   | 8    | 9.18               | HDL,TC,LDL          | 0.566           | 0.0013           | 0.311            | -               |                                    |
| <i>PINX1</i>    | rs11776767  | 8    | 10.68              | TG                  | 0.503           | 0.253            | 0.688            | 0.244           |                                    |
| <i>NAT2</i>     | rs1495741   | 8    | 18.27              | TG,TC               | 0.468           | <b>1.57E-11</b>  | 0.0038           | 0.599           |                                    |
| <i>LPL</i>      | rs12678919  | 8    | 19.84              | TG,HDL              | 0.541           | 0.905            | 0.300            | 0.818           |                                    |
| <i>SOX17</i>    | rs10102164  | 8    | 55.42              | LDL,TC              | 0.036           | 0.852            | 0.107            | 0.651           |                                    |
| <i>CYP7A1</i>   | rs2081687   | 8    | 59.39              | TC,LDL              | 0.376           | 0.114            | 0.610            | 0.472           |                                    |
| <i>TRPS1</i>    | rs2293889   | 8    | 116.60             | HDL                 | 0.848           | 0.021            | 0.237            | 0.860           |                                    |
| <i>TRIB1</i>    | rs2954029   | 8    | 126.49             | TG,TC,LDL,HDL       | 0.842           | <b>1.12E-04</b>  | 0.143            | <b>4.03E-05</b> |                                    |

## Loci reported to affect lipid phenotypes

## From GISC discovery meta-analysis

| Locus               | Marker name | Chr. | hg19 position (Mb) | Associated trait(s) | p(Fe) | p(Tf)           | p(Sat) | p(Ferri)        | Comments                                       |
|---------------------|-------------|------|--------------------|---------------------|-------|-----------------|--------|-----------------|------------------------------------------------|
| <i>PLEC1</i>        | rs11136341  | 8    | 145.04             | LDL,TC              | 0.867 | 0.798           | 0.409  | 0.756           |                                                |
| <i>VLDLR</i>        | rs3780181   | 9    | 2.64               | TC,LDL              | 0.843 | 0.917           | 0.723  | 0.777           |                                                |
| <i>TTC39B</i>       | rs581080    | 9    | 15.31              | HDL,TC              | 0.054 | 0.832           | 0.161  | 0.365           |                                                |
| <i>ABCA1</i>        | rs1883025   | 9    | 107.66             | HDL,TC              | 0.989 | 0.495           | 0.812  | 0.264           |                                                |
| <i>ABO</i>          | rs9411489   | 9    | 136.16             | LDL,TC              | 0.358 | 0.188           | 0.110  | <b>2.54E-07</b> | Using rs651007 as proxy, R <sup>2</sup> =1.000 |
| <i>AKR1C4</i>       | rs1832007   | 10   | 5.25               | TG                  | 0.023 | 0.093           | 0.229  | 0.758           |                                                |
| <i>VIM-CUBN</i>     | rs10904908  | 10   | 17.26              | TC                  | -     | -               | 0.093  | -               |                                                |
| <i>MARCH8-ALOX5</i> | rs970548    | 10   | 46.01              | HDL,TC              | 0.848 | 0.060           | 0.412  | 0.427           |                                                |
| <i>JMJD1C</i>       | rs10761731  | 10   | 65.03              | TG                  | 0.030 | 0.592           | 0.116  | 0.731           |                                                |
| <i>CYP26A1</i>      | rs2068888   | 10   | 94.84              | TG                  | 0.133 | 0.049           | 0.005  | 0.495           |                                                |
| <i>GPAM</i>         | rs2255141   | 10   | 113.93             | TC,LDL              | 0.390 | 0.852           | 0.404  | 0.373           |                                                |
| <i>AMPD3</i>        | rs2923084   | 11   | 10.39              | HDL                 | 0.306 | 0.159           | 0.123  | 0.579           |                                                |
| <i>SPTY2D1</i>      | rs10128711  | 11   | 18.63              | TC                  | 0.680 | 0.882           | 0.759  | 0.237           |                                                |
| <i>LRP4</i>         | rs3136441   | 11   | 46.74              | HDL                 | 0.116 | 0.678           | 0.062  | 0.711           |                                                |
| <i>OR4C46</i>       | rs11246602  | 11   | 51.51              | HDL                 | 0.984 | 0.566           | 0.704  | 0.251           |                                                |
| <i>FADS1-2-3</i>    | rs174546    | 11   | 61.57              | TG,LDL,TC,HDL       | 0.901 | <b>7.43E-10</b> | 0.023  | 0.051           |                                                |
| <i>KAT5</i>         | rs12801636  | 11   | 65.39              | HDL                 | 0.088 | 0.304           | 0.043  | 0.495           |                                                |
| <i>MOGAT2-DGAT2</i> | rs499974    | 11   | 75.46              | HDL                 | 0.807 | 0.669           | 0.884  | 0.333           |                                                |
| <i>APOA1</i>        | rs964184    | 11   | 116.65             | TG,TC,HDL,LDL       | 0.706 | 0.246           | 0.583  | 0.956           |                                                |
| <i>PHLDB1</i>       | rs11603023  | 11   | 118.49             | TC                  | 0.182 | 0.027           | 0.876  | 0.691           |                                                |
| <i>UBASH3B</i>      | rs7941030   | 11   | 122.52             | TC,HDL              | 0.844 | 0.0056          | 0.470  | 0.363           |                                                |
| <i>ST3GAL4</i>      | rs11220462  | 11   | 126.24             | LDL,TC              | 0.354 | 0.161           | 0.683  | 0.021           |                                                |
| <i>PHC1-A2ML1</i>   | rs4883201   | 12   | 9.08               | TC                  | 0.591 | 0.049           | 0.411  | 0.811           |                                                |
| <i>PDE3A</i>        | rs7134375   | 12   | 20.47              | HDL                 | 0.165 | 0.521           | 0.265  | 0.400           |                                                |
| <i>LRP1</i>         | rs11613352  | 12   | 57.79              | TG,HDL              | 0.512 | 0.239           | 0.262  | <b>1.44E-04</b> |                                                |
| <i>MVK</i>          | rs7134594   | 12   | 110.00             | HDL                 | 0.023 | 0.149           | 0.019  | 0.655           |                                                |
| <i>BRAP</i>         | rs11065987  | 12   | 112.07             | TC,LDL              | 0.390 | 0.0052          | 0.043  | 0.185           |                                                |
| <i>HNF1A</i>        | rs1169288   | 12   | 121.42             | TC,LDL              | 0.326 | 0.488           | 0.627  | 0.043           |                                                |
| <i>SBNO1</i>        | rs4759375   | 12   | 123.80             | HDL                 | 0.593 | 0.630           | 0.596  | 0.327           |                                                |
| <i>ZNF664</i>       | rs4765127   | 12   | 124.46             | HDL,TG              | 0.182 | 0.223           | 0.208  | 0.130           |                                                |

## Loci reported to affect lipid phenotypes

## From GISC discovery meta-analysis

| Locus              | Marker name | Chr. | hg19 position (Mb) | Associated trait(s) | p(Fe) | p(Tf)    | p(Sat) | p(Ferri)        | Comments                                        |
|--------------------|-------------|------|--------------------|---------------------|-------|----------|--------|-----------------|-------------------------------------------------|
| <i>SCARB1</i>      | rs838880    | 12   | 125.26             | HDL                 | 0.158 | 0.948    | 0.286  | 0.886           |                                                 |
| <i>BRCA2</i>       | rs4942486   | 13   | 32.95              | LDL                 | 0.197 | 0.296    | 0.062  | 0.703           |                                                 |
| <i>NYNRIN</i>      | rs8017377   | 14   | 24.88              | LDL                 | 0.636 | 0.703    | 0.890  | 0.051           |                                                 |
| <i>ZBTB42-AKT1</i> | rs4983559   | 14   | 105.28             | HDL                 | 0.335 | 0.641    | 0.428  | 0.042           |                                                 |
| <i>CAPN3</i>       | rs2412710   | 15   | 42.68              | TG                  | -     | -        | -      | -               | No results for this SNP or proxies              |
| <i>FRMD5</i>       | rs2929282   | 15   | 44.25              | TG                  | 0.640 | 0.190    | 0.140  | 0.406           |                                                 |
| <i>LIPC</i>        | rs1532085   | 15   | 58.68              | HDL,TC,TG           | 0.292 | 0.348    | 0.557  | 0.834           |                                                 |
| <i>LACTB</i>       | rs2652834   | 15   | 63.40              | HDL                 | 0.905 | 0.796    | 0.992  | 0.122           |                                                 |
| <i>PDXDC1</i>      | rs3198697   | 16   | 15.13              | TG                  | 0.555 | 0.182    | 0.443  | 0.283           |                                                 |
| <i>CTF1</i>        | rs11649653  | 16   | 30.92              | TG                  | 0.222 | 0.832    | 0.339  | 0.838           |                                                 |
| <i>FTO</i>         | rs1121980   | 16   | 53.81              | HDL,TG              | 0.700 | 0.166    | 0.457  | 0.710           |                                                 |
| <i>CETP</i>        | rs3764261   | 16   | 56.99              | HDL,LDL,TC,TG       | 0.838 | 0.432    | 0.875  | 0.633           |                                                 |
| <i>LCAT</i>        | rs16942887  | 16   | 67.93              | HDL                 | 0.081 | 0.628    | 0.285  | 0.904           |                                                 |
| <i>HPR</i>         | rs2000999   | 16   | 72.11              | TC,LDL              | 0.189 | 0.011    | 0.958  | 0.025           |                                                 |
| <i>CMIP</i>        | rs2925979   | 16   | 81.53              | HDL                 | 0.844 | 0.510    | 0.572  | 0.118           |                                                 |
| <i>DLG4</i>        | rs314253    | 17   | 7.09               | TC,LDL              | 0.055 | 0.154    | 0.021  | 0.828           |                                                 |
| <i>STARD3</i>      | rs11869286  | 17   | 37.81              | HDL                 | 0.029 | 0.068    | 0.210  | 0.866           |                                                 |
| <i>MPP3</i>        | rs8077889   | 17   | 41.88              | TG                  | 0.600 | 0.624    | 0.319  | 0.379           |                                                 |
| <i>OSBPL7</i>      | rs7206971   | 17   | 45.43              | LDL,TC              | 0.240 | 0.059    | 0.712  | 0.362           |                                                 |
| <i>APOH-PRXCA</i>  | rs1801689   | 17   | 64.21              | LDL                 | -     | -        | -      | -               | No results for this SNP or proxies              |
| <i>ABCA8</i>       | rs4148008   | 17   | 66.88              | HDL                 | 0.853 | 0.527    | 0.458  | 0.550           | Using rs4148005 as proxy, R <sup>2</sup> =1.000 |
| <i>PGS1</i>        | rs4129767   | 17   | 76.40              | HDL                 | 0.466 | 0.033    | 0.078  | <b>3.21E-04</b> |                                                 |
| <i>LIPG</i>        | rs7241918   | 18   | 47.16              | HDL,TC              | 0.694 | 0.025    | 0.734  | 0.083           |                                                 |
| <i>MC4R</i>        | rs12967135  | 18   | 57.85              | HDL                 | 0.218 | 0.0075   | 0.012  | 0.148           |                                                 |
| <i>INSR</i>        | rs7248104   | 19   | 7.22               | TG                  | 0.249 | 9.56E-04 | 0.019  | 0.070           |                                                 |
| <i>ANGPTL4</i>     | rs7255436   | 19   | 8.43               | HDL                 | 0.771 | 0.022    | 0.896  | 0.029           |                                                 |
| <i>LDLR</i>        | rs6511720   | 19   | 11.20              | LDL,TC              | 0.961 | 0.391    | 0.743  | 0.718           |                                                 |
| <i>ANGPTL8</i>     | rs737337    | 19   | 11.35              | HDL                 | 0.233 | 0.282    | 0.792  | 0.800           |                                                 |
| <i>CILP2</i>       | rs10401969  | 19   | 19.41              | TC,TG,LDL           | 0.281 | 0.023    | 0.047  | 0.331           |                                                 |
| <i>PEPD</i>        | rs731839    | 19   | 33.90              | TG,HDL              | 0.842 | 0.398    | 0.890  | 0.252           |                                                 |

## Loci reported to affect lipid phenotypes

## From GISC discovery meta-analysis

| Locus           | Marker name | Chr. | hg19 position (Mb) | Associated trait(s) | p(Fe) | p(Tf)           | p(Sat) | p(Ferri) | Comments                           |
|-----------------|-------------|------|--------------------|---------------------|-------|-----------------|--------|----------|------------------------------------|
| <i>APOE</i>     | rs4420638   | 19   | 45.42              | LDL,TC,HDL          | -     | -               | -      | -        | No results for this SNP or proxies |
| <i>FLJ36070</i> | rs492602    | 19   | 49.21              | TC                  | 0.098 | 0.833           | 0.114  | 0.155    |                                    |
| <i>HAS1</i>     | rs17695224  | 19   | 52.32              | HDL                 | 0.295 | 0.535           | 0.029  | 0.083    |                                    |
| <i>LILRA3</i>   | rs386000    | 19   | 54.79              | HDL                 | 0.035 | 0.490           | 0.027  | 0.395    |                                    |
| <i>SPTLC3</i>   | rs364585    | 20   | 12.96              | LDL                 | 0.500 | 0.362           | 0.349  | -        |                                    |
| <i>SNX5</i>     | rs2328223   | 20   | 17.85              | LDL                 | 0.383 | <b>6.30E-05</b> | 0.649  | 0.444    |                                    |
| <i>ERGIC3</i>   | rs2277862   | 20   | 34.15              | TC                  | 0.199 | 0.150           | 0.459  | 0.557    |                                    |
| <i>MAFB</i>     | rs2902940   | 20   | 39.09              | TC,LDL              | 0.617 | 0.460           | 0.472  | 0.193    | No results for this SNP or proxies |
| <i>TOP1</i>     | rs6029526   | 20   | 39.67              | LDL,TC              | 0.813 | 0.064           | 0.188  | 0.871    |                                    |
| <i>HNF4A</i>    | rs1800961   | 20   | 43.04              | HDL,TC              | -     | -               | -      | -        |                                    |
| <i>PLTP</i>     | rs6065906   | 20   | 44.55              | HDL,TG              | 0.697 | 0.549           | 0.822  | 0.262    |                                    |
| <i>UBE2L3</i>   | rs181362    | 22   | 21.93              | HDL                 | 0.020 | 0.269           | 0.027  | 0.380    |                                    |
| <i>MTMR3</i>    | rs5763662   | 22   | 30.38              | LDL                 | -     | 0.327           | -      | -        |                                    |
| <i>TOM1</i>     | rs138777    | 22   | 35.71              | TC                  | 0.602 | 0.842           | 0.646  | 0.431    |                                    |
| <i>PLA2G6</i>   | rs5756931   | 22   | 38.55              | TG                  | 0.962 | 0.442           | 0.914  | 0.289    |                                    |
| <i>PPARA</i>    | rs4253772   | 22   | 46.63              | TC,LDL              | 0.412 | 0.101           | 0.820  | 0.726    |                                    |

**Supplementary Table 9.** SNP associations in *HFE* YY subjects only. Statistical tests were performed and results for the QIMR and HEIRS data were meta-analysed as described in the paper.

| Iron      |     |             |                |    |    |       | HEIRS  |       |        | QIMR adults |       |       | Combined |       |         |
|-----------|-----|-------------|----------------|----|----|-------|--------|-------|--------|-------------|-------|-------|----------|-------|---------|
| SNP       | CHR | BP (B37)    | Nearest gene   | A1 | A2 | Freq1 | Effect | SE    | P      | Effect      | SE    | P     | Effect   | SE    | P       |
| rs744653  | 2   | 190,378,750 | <i>SLC40A1</i> | T  | C  | 0.854 | 0.060  | 0.059 | 0.312  | -0.106      | 0.119 | 0.372 | 0.027    | 0.053 | 0.614   |
| rs8177240 | 3   | 133,477,701 | <i>TF</i>      | T  | G  | 0.669 | -0.115 | 0.059 | 0.053  | -0.009      | 0.120 | 0.940 | -0.094   | 0.053 | 0.077   |
| rs9990333 | 3   | 195,827,205 | <i>TFRC</i>    | T  | C  | 0.460 | 0.117  | 0.062 | 0.057  | -0.046      | 0.120 | 0.703 | 0.083    | 0.055 | 0.129   |
| rs7385804 | 7   | 100,235,970 | <i>TFR2</i>    | A  | C  | 0.621 | 0.182  | 0.059 | 0.0020 | 0.161       | 0.119 | 0.174 | 0.178    | 0.053 | 0.00076 |
| rs4921915 | 8   | 18,272,466  | <i>NAT2</i>    | A  | G  | 0.782 | -0.075 | 0.059 | 0.209  | -0.177      | 0.118 | 0.135 | -0.095   | 0.053 | 0.073   |
| rs651007  | 9   | 136,153,875 | <i>ABO</i>     | T  | C  | 0.202 | 0.020  | 0.060 | 0.735  | 0.019       | 0.121 | 0.877 | 0.020    | 0.054 | 0.710   |
| rs6486121 | 11  | 13,355,770  | <i>ARNTL</i>   | T  | C  | 0.631 | -0.037 | 0.059 | 0.534  | -0.136      | 0.119 | 0.256 | -0.057   | 0.053 | 0.288   |
| rs174577  | 11  | 61,604,814  | <i>FADS2</i>   | A  | C  | 0.330 | -0.074 | 0.060 | 0.219  | 0.116       | 0.119 | 0.330 | -0.035   | 0.054 | 0.509   |
| rs411988  | 17  | 56,709,034  | <i>TEX14</i>   | A  | G  | 0.564 | 0.101  | 0.060 | 0.091  | 0.104       | 0.120 | 0.387 | 0.102    | 0.054 | 0.058   |
| rs855791  | 22  | 37,462,936  | <i>TMPRSS6</i> | A  | G  | 0.446 | -0.022 | 0.060 | 0.720  | -0.304      | 0.115 | 0.008 | -0.083   | 0.053 | 0.121   |

  

| Transferrin |     |             |                |    |    |       | HEIRS  |       |          | QIMR adults |       |        | Combined |       |          |
|-------------|-----|-------------|----------------|----|----|-------|--------|-------|----------|-------------|-------|--------|----------|-------|----------|
| SNP         | CHR | BP (B37)    | Nearest gene   | A1 | A2 | Freq1 | Effect | SE    | P        | Effect      | SE    | P      | Effect   | SE    | P        |
| rs744653    | 2   | 190,378,750 | <i>SLC40A1</i> | T  | C  | 0.854 | 0.042  | 0.060 | 0.485    | 0.136       | 0.117 | 0.245  | 0.061    | 0.053 | 0.249    |
| rs8177240   | 3   | 133,477,701 | <i>TF</i>      | T  | G  | 0.669 | -0.298 | 0.058 | 2.16E-07 | -0.338      | 0.111 | 0.0023 | -0.306   | 0.051 | 1.93E-09 |
| rs9990333   | 3   | 195,827,205 | <i>TFRC</i>    | T  | C  | 0.460 | 0.018  | 0.063 | 0.777    | 0.134       | 0.117 | 0.253  | 0.044    | 0.055 | 0.430    |
| rs7385804   | 7   | 100,235,970 | <i>TFR2</i>    | A  | C  | 0.621 | 0.007  | 0.061 | 0.909    | 0.150       | 0.116 | 0.196  | 0.038    | 0.054 | 0.485    |
| rs4921915   | 8   | 18,272,466  | <i>NAT2</i>    | A  | G  | 0.782 | 0.007  | 0.060 | 0.906    | -0.106      | 0.116 | 0.360  | -0.017   | 0.053 | 0.751    |
| rs651007    | 9   | 136,153,875 | <i>ABO</i>     | T  | C  | 0.202 | -0.012 | 0.060 | 0.093    | -0.043      | 0.118 | 0.719  | -0.089   | 0.054 | 0.097    |
| rs6486121   | 11  | 13,355,770  | <i>ARNTL</i>   | T  | C  | 0.631 | 0.003  | 0.060 | 0.958    | 0.123       | 0.115 | 0.285  | 0.029    | 0.053 | 0.588    |
| rs174577    | 11  | 61,604,814  | <i>FADS2</i>   | A  | C  | 0.330 | -0.059 | 0.061 | 0.332    | 0.264       | 0.113 | 0.020  | 0.013    | 0.053 | 0.806    |
| rs411988    | 17  | 56,709,034  | <i>TEX14</i>   | A  | G  | 0.564 | 0.023  | 0.061 | 0.702    | 0.009       | 0.118 | 0.942  | 0.020    | 0.054 | 0.709    |
| rs855791    | 22  | 37,462,936  | <i>TMPRSS6</i> | A  | G  | 0.446 | 0.036  | 0.061 | 0.554    | 0.303       | 0.112 | 0.007  | 0.096    | 0.053 | 0.072    |

  

| Transferrin Saturation |     |          |              |    |    |       | HEIRS  |    |   | QIMR adults |    |   | Combined |    |   |
|------------------------|-----|----------|--------------|----|----|-------|--------|----|---|-------------|----|---|----------|----|---|
| SNP                    | CHR | BP (B37) | Nearest gene | A1 | A2 | Freq1 | Effect | SE | P | Effect      | SE | P | Effect   | SE | P |

|           |    |             |         |   |   |       |        |       |       |        |       |       |        |       |       |
|-----------|----|-------------|---------|---|---|-------|--------|-------|-------|--------|-------|-------|--------|-------|-------|
| rs744653  | 2  | 190,378,750 | SLC40A1 | T | C | 0.854 | 0.041  | 0.059 | 0.488 | -0.042 | 0.130 | 0.746 | 0.027  | 0.054 | 0.619 |
| rs8177240 | 3  | 133,477,701 | TF      | T | G | 0.669 | 0.033  | 0.059 | 0.581 | -0.057 | 0.129 | 0.658 | 0.017  | 0.054 | 0.752 |
| rs9990333 | 3  | 195,827,205 | TFRC    | T | C | 0.460 | 0.111  | 0.061 | 0.070 | -0.106 | 0.129 | 0.413 | 0.071  | 0.055 | 0.198 |
| rs7385804 | 7  | 100,235,970 | TFR2    | A | C | 0.621 | 0.165  | 0.059 | 0.005 | -0.100 | 0.128 | 0.435 | 0.119  | 0.054 | 0.026 |
| rs4921915 | 8  | 18,272,466  | NAT2    | A | G | 0.782 | -0.073 | 0.059 | 0.217 | 0.008  | 0.130 | 0.954 | -0.059 | 0.054 | 0.272 |
| rs651007  | 9  | 136,153,875 | ABO     | T | C | 0.202 | 0.073  | 0.060 | 0.220 | -0.036 | 0.131 | 0.784 | 0.054  | 0.054 | 0.317 |
| rs6486121 | 11 | 13,355,770  | ARNTL   | T | C | 0.631 | -0.046 | 0.059 | 0.437 | -0.116 | 0.129 | 0.368 | -0.058 | 0.054 | 0.280 |
| rs174577  | 11 | 61,604,814  | FADS2   | A | C | 0.330 | -0.048 | 0.060 | 0.421 | 0.035  | 0.130 | 0.787 | -0.034 | 0.054 | 0.536 |
| rs411988  | 17 | 56,709,034  | TEX14   | A | G | 0.564 | 0.089  | 0.060 | 0.137 | -0.004 | 0.129 | 0.977 | 0.073  | 0.054 | 0.181 |
| rs855791  | 22 | 37,462,936  | TMPRSS6 | A | G | 0.446 | -0.040 | 0.060 | 0.505 | -0.278 | 0.125 | 0.026 | -0.084 | 0.054 | 0.119 |

| Ferritin  |     |             |              |    |    |       | HEIRS  |       |       | QIMR adults |       |          | Combined |       |        |
|-----------|-----|-------------|--------------|----|----|-------|--------|-------|-------|-------------|-------|----------|----------|-------|--------|
| SNP       | CHR | BP (B37)    | Nearest gene | A1 | A2 | Freq1 | Effect | SE    | P     | Effect      | SE    | P        | Effect   | SE    | P      |
| rs744653  | 2   | 190,378,750 | SLC40A1      | T  | C  | 0.854 | 0.031  | 0.057 | 0.583 | -0.086      | 0.117 | 0.464    | 0.009    | 0.051 | 0.861  |
| rs8177240 | 3   | 133,477,701 | TF           | T  | G  | 0.669 | 0.010  | 0.057 | 0.864 | 0.073       | 0.117 | 0.534    | 0.022    | 0.051 | 0.670  |
| rs9990333 | 3   | 195,827,205 | TFRC         | T  | C  | 0.460 | 0.101  | 0.059 | 0.085 | -0.145      | 0.116 | 0.213    | 0.051    | 0.052 | 0.327  |
| rs7385804 | 7   | 100,235,970 | TFR2         | A  | C  | 0.621 | -0.030 | 0.057 | 0.602 | -0.067      | 0.117 | 0.566    | -0.037   | 0.052 | 0.471  |
| rs4921915 | 8   | 18,272,466  | NAT2         | A  | G  | 0.782 | -0.053 | 0.057 | 0.356 | 0.004       | 0.118 | 0.970    | -0.042   | 0.051 | 0.415  |
| rs651007  | 9   | 136,153,875 | ABO          | T  | C  | 0.202 | 0.035  | 0.057 | 0.544 | 0.140       | 0.118 | 0.233    | 0.055    | 0.052 | 0.285  |
| rs6486121 | 11  | 13,355,770  | ARNTL        | T  | C  | 0.631 | -0.089 | 0.057 | 0.116 | -0.386      | 0.108 | 3.36E-04 | -0.153   | 0.050 | 0.0022 |
| rs174577  | 11  | 61,604,814  | FADS2        | A  | C  | 0.330 | -0.023 | 0.057 | 0.690 | -0.077      | 0.117 | 0.512    | -0.033   | 0.052 | 0.518  |
| rs411988  | 17  | 56,709,034  | TEX14        | A  | G  | 0.564 | -0.006 | 0.058 | 0.912 | 0.030       | 0.118 | 0.799    | 0.001    | 0.052 | 0.990  |
| rs855791  | 22  | 37,462,936  | TMPRSS6      | A  | G  | 0.446 | 0.096  | 0.057 | 0.092 | -0.411      | 0.107 | 0.000    | -0.016   | 0.051 | 0.755  |

**Supplementary Table 10.** Associations between genetic prediction scores (from lead SNPs at significant or suggestive loci) from the population-based Discovery + Replication datasets, and the observed phenotypes in the *HFE* C282Y homozygotes from the HEIRS Study. Sex stratified regression analysis, adjusted for age, phlebotomy status and blood donation history. Note that the near-significant correlation for ferritin in men is in the opposite direction to that expected.

| Trait:                     | Sex    | N   | Beta $\pm$ SE    | R <sup>2</sup> ( percent of variance) | P-value |
|----------------------------|--------|-----|------------------|---------------------------------------|---------|
| Iron                       | Male   | 119 | 0.02 $\pm$ 0.09  | 0%                                    | 0.83    |
|                            | Female | 158 | 0.13 $\pm$ 0.08  | 1.5%                                  | 0.12    |
| Transferrin                | Male   | 119 | 0.35 $\pm$ 0.09  | 12%                                   | 0.0001  |
|                            | Female | 158 | 0.21 $\pm$ 0.08  | 4.5%                                  | 0.007   |
| Saturation                 | Male   | 119 | -0.03 $\pm$ 0.09 | 0%                                    | 0.74    |
|                            | Female | 158 | 0.09 $\pm$ 0.08  | 0.8%                                  | 0.27    |
| Log <sub>10</sub> Ferritin | Male   | 119 | -0.17 $\pm$ 0.09 | 3%                                    | 0.06    |
|                            | Female | 158 | -0.01 $\pm$ 0.08 | 0%                                    | 0.94    |
